# Supplementary material
Source: ML conference proceedings conference paper supplement (https://openreview.net/forum?id=LSrpJkynU2)

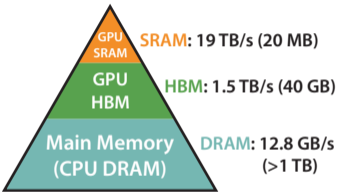

Memory Hierarchy with Bandwidth & Memory Size

SRAM: 19 TB/s (20 MB)

HBM: 1.5 TB/s (40 GB)

DRAM: 12.8 GB/s (>1 TB)

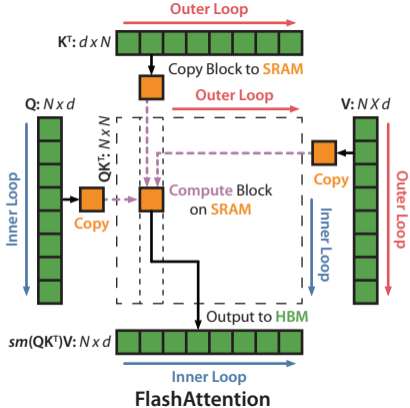

FlashAttention

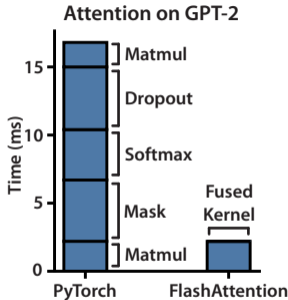

Supplement: supplementary_material [file flashattn_banner.pdf › scorpio/.deps/vllm-flash-attn-src/assets/flashattn_banner.pdf]

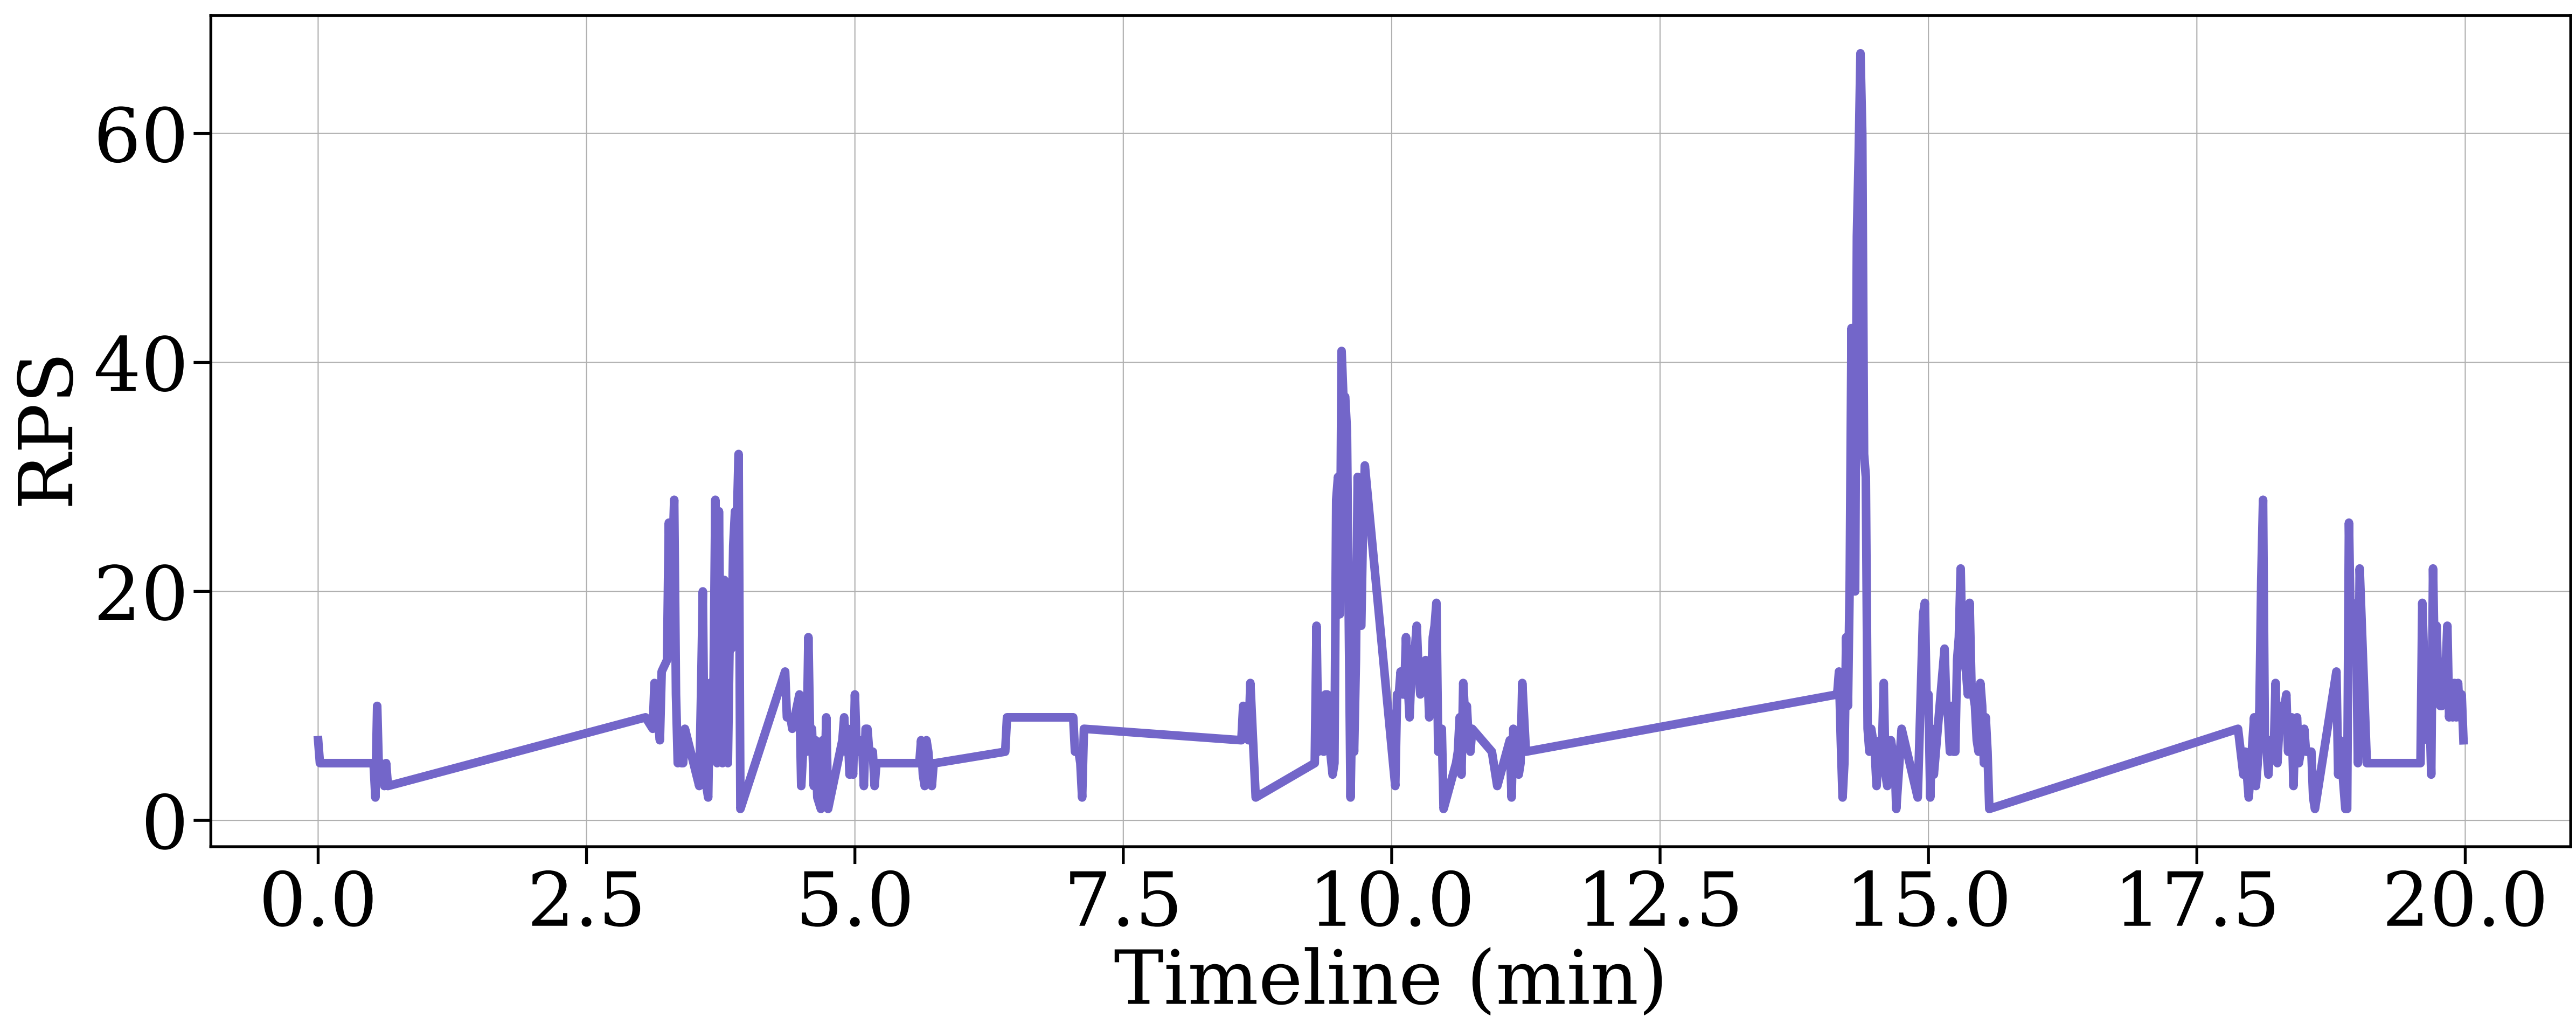

Supplement: supplementary_material [file trace.pdf › scorpio/datasets/trace.pdf]

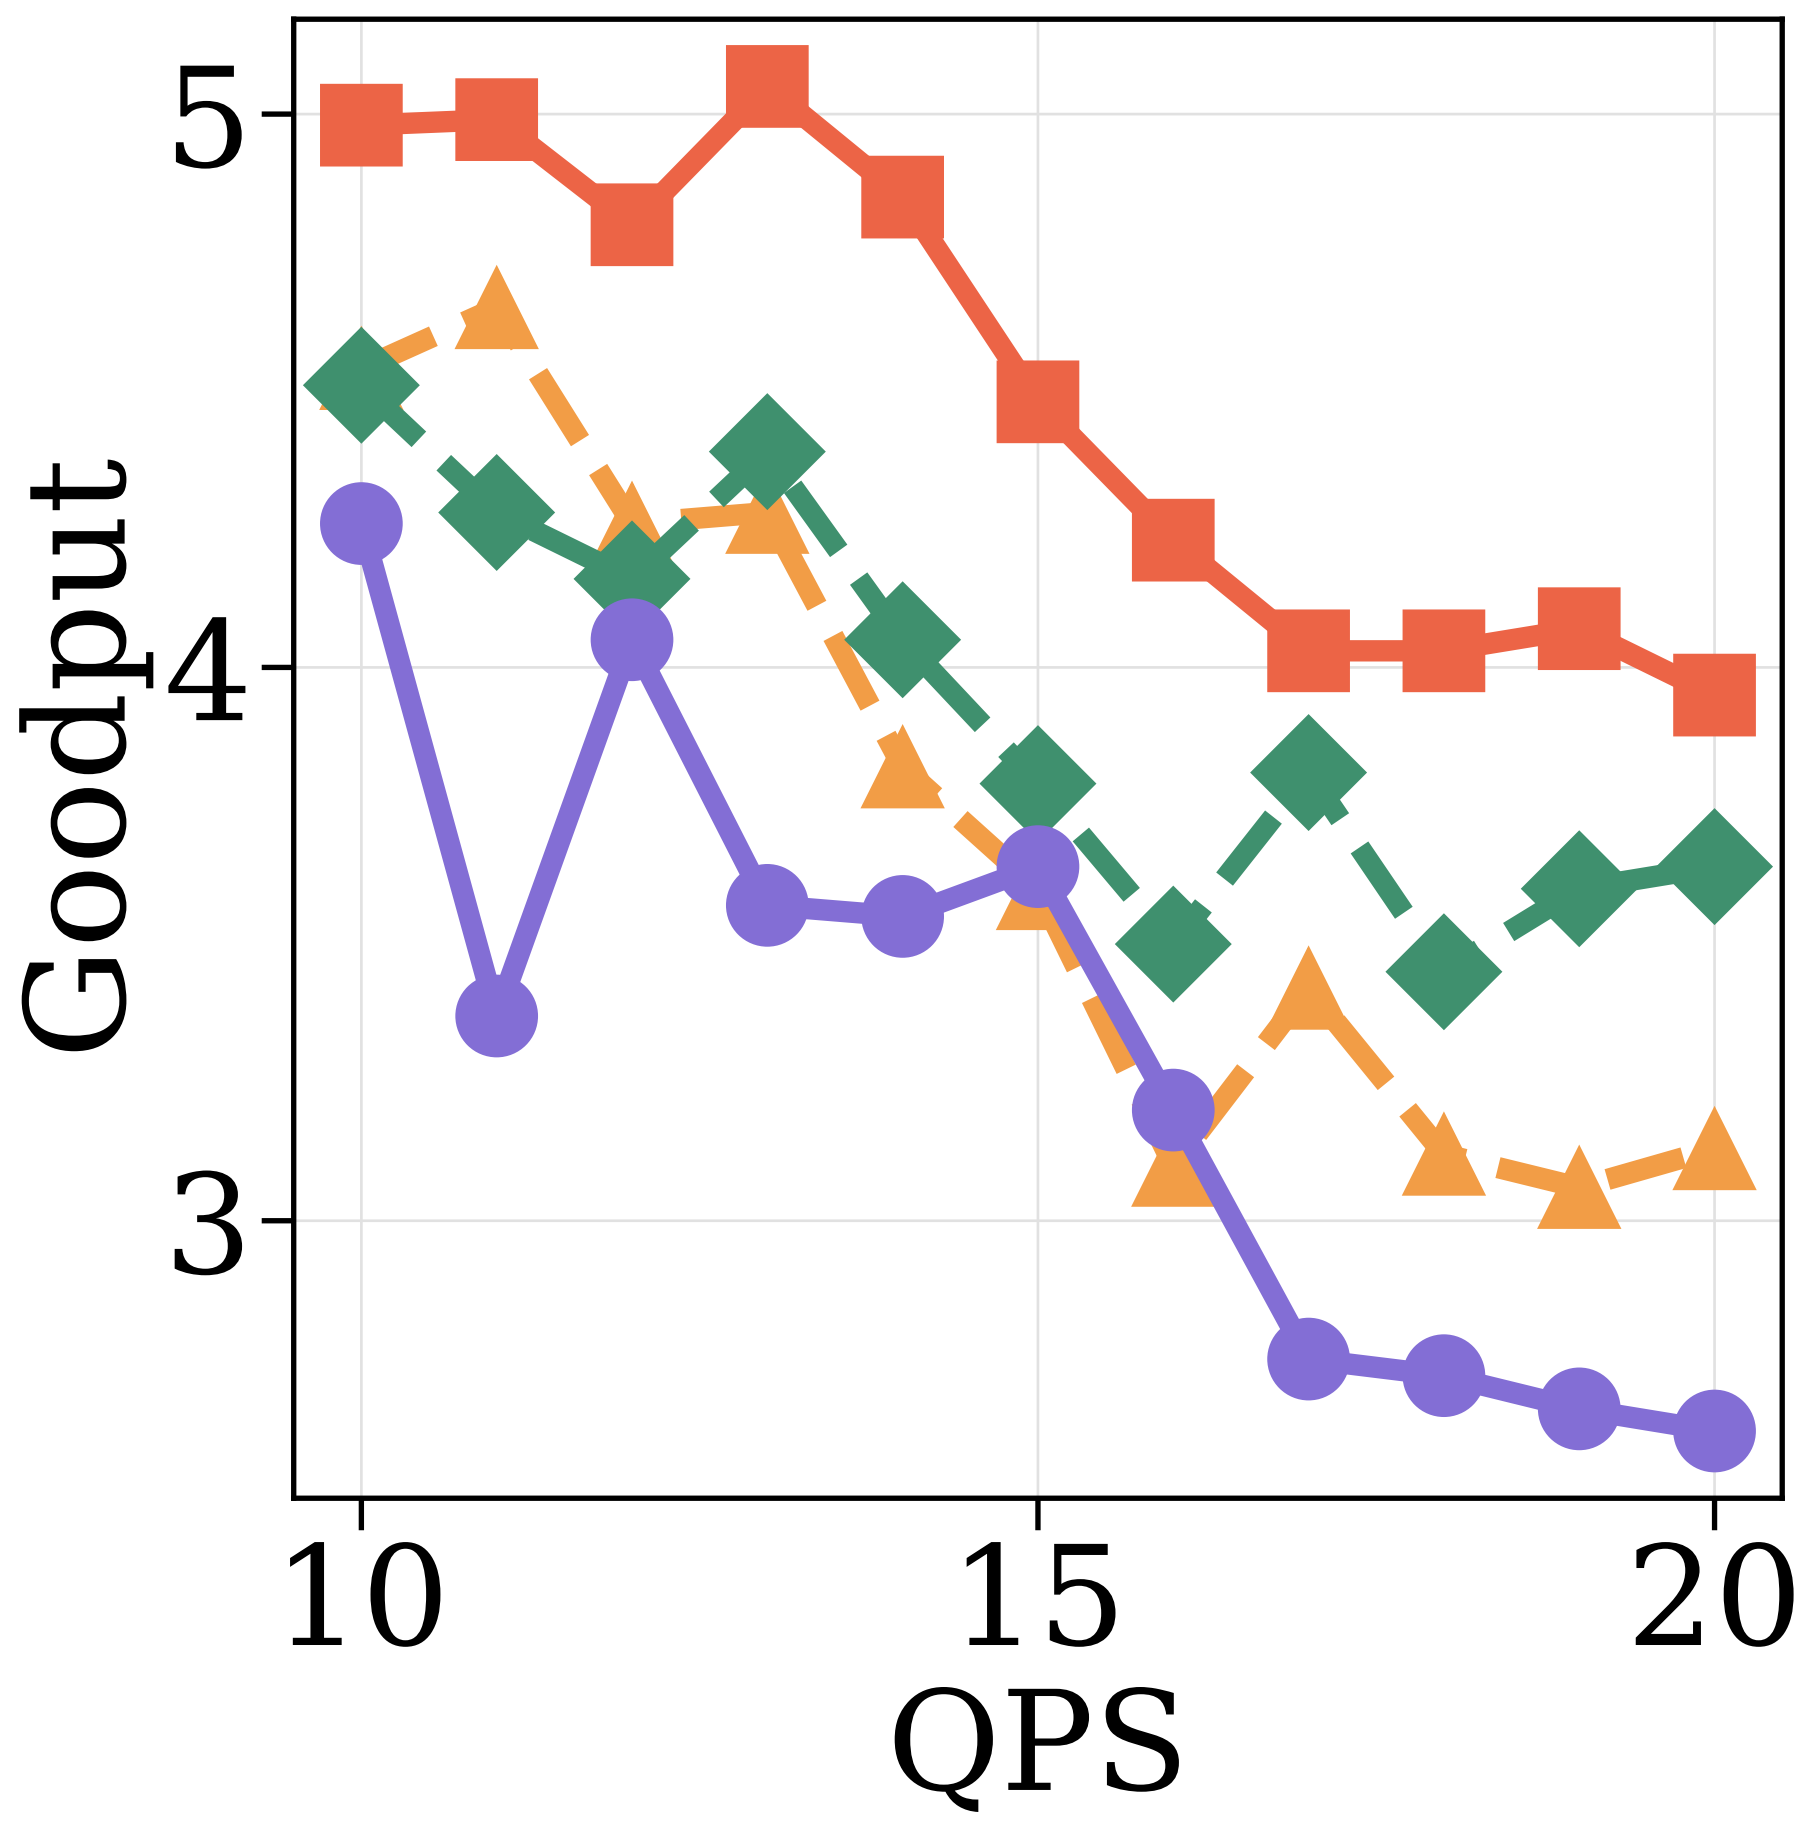

Supplement: supplementary_material [file goodput_vs_qps.pdf › scorpio/draw/gemma27b-lmsys/exp1_qps_scaling/goodput_vs_qps.pdf]

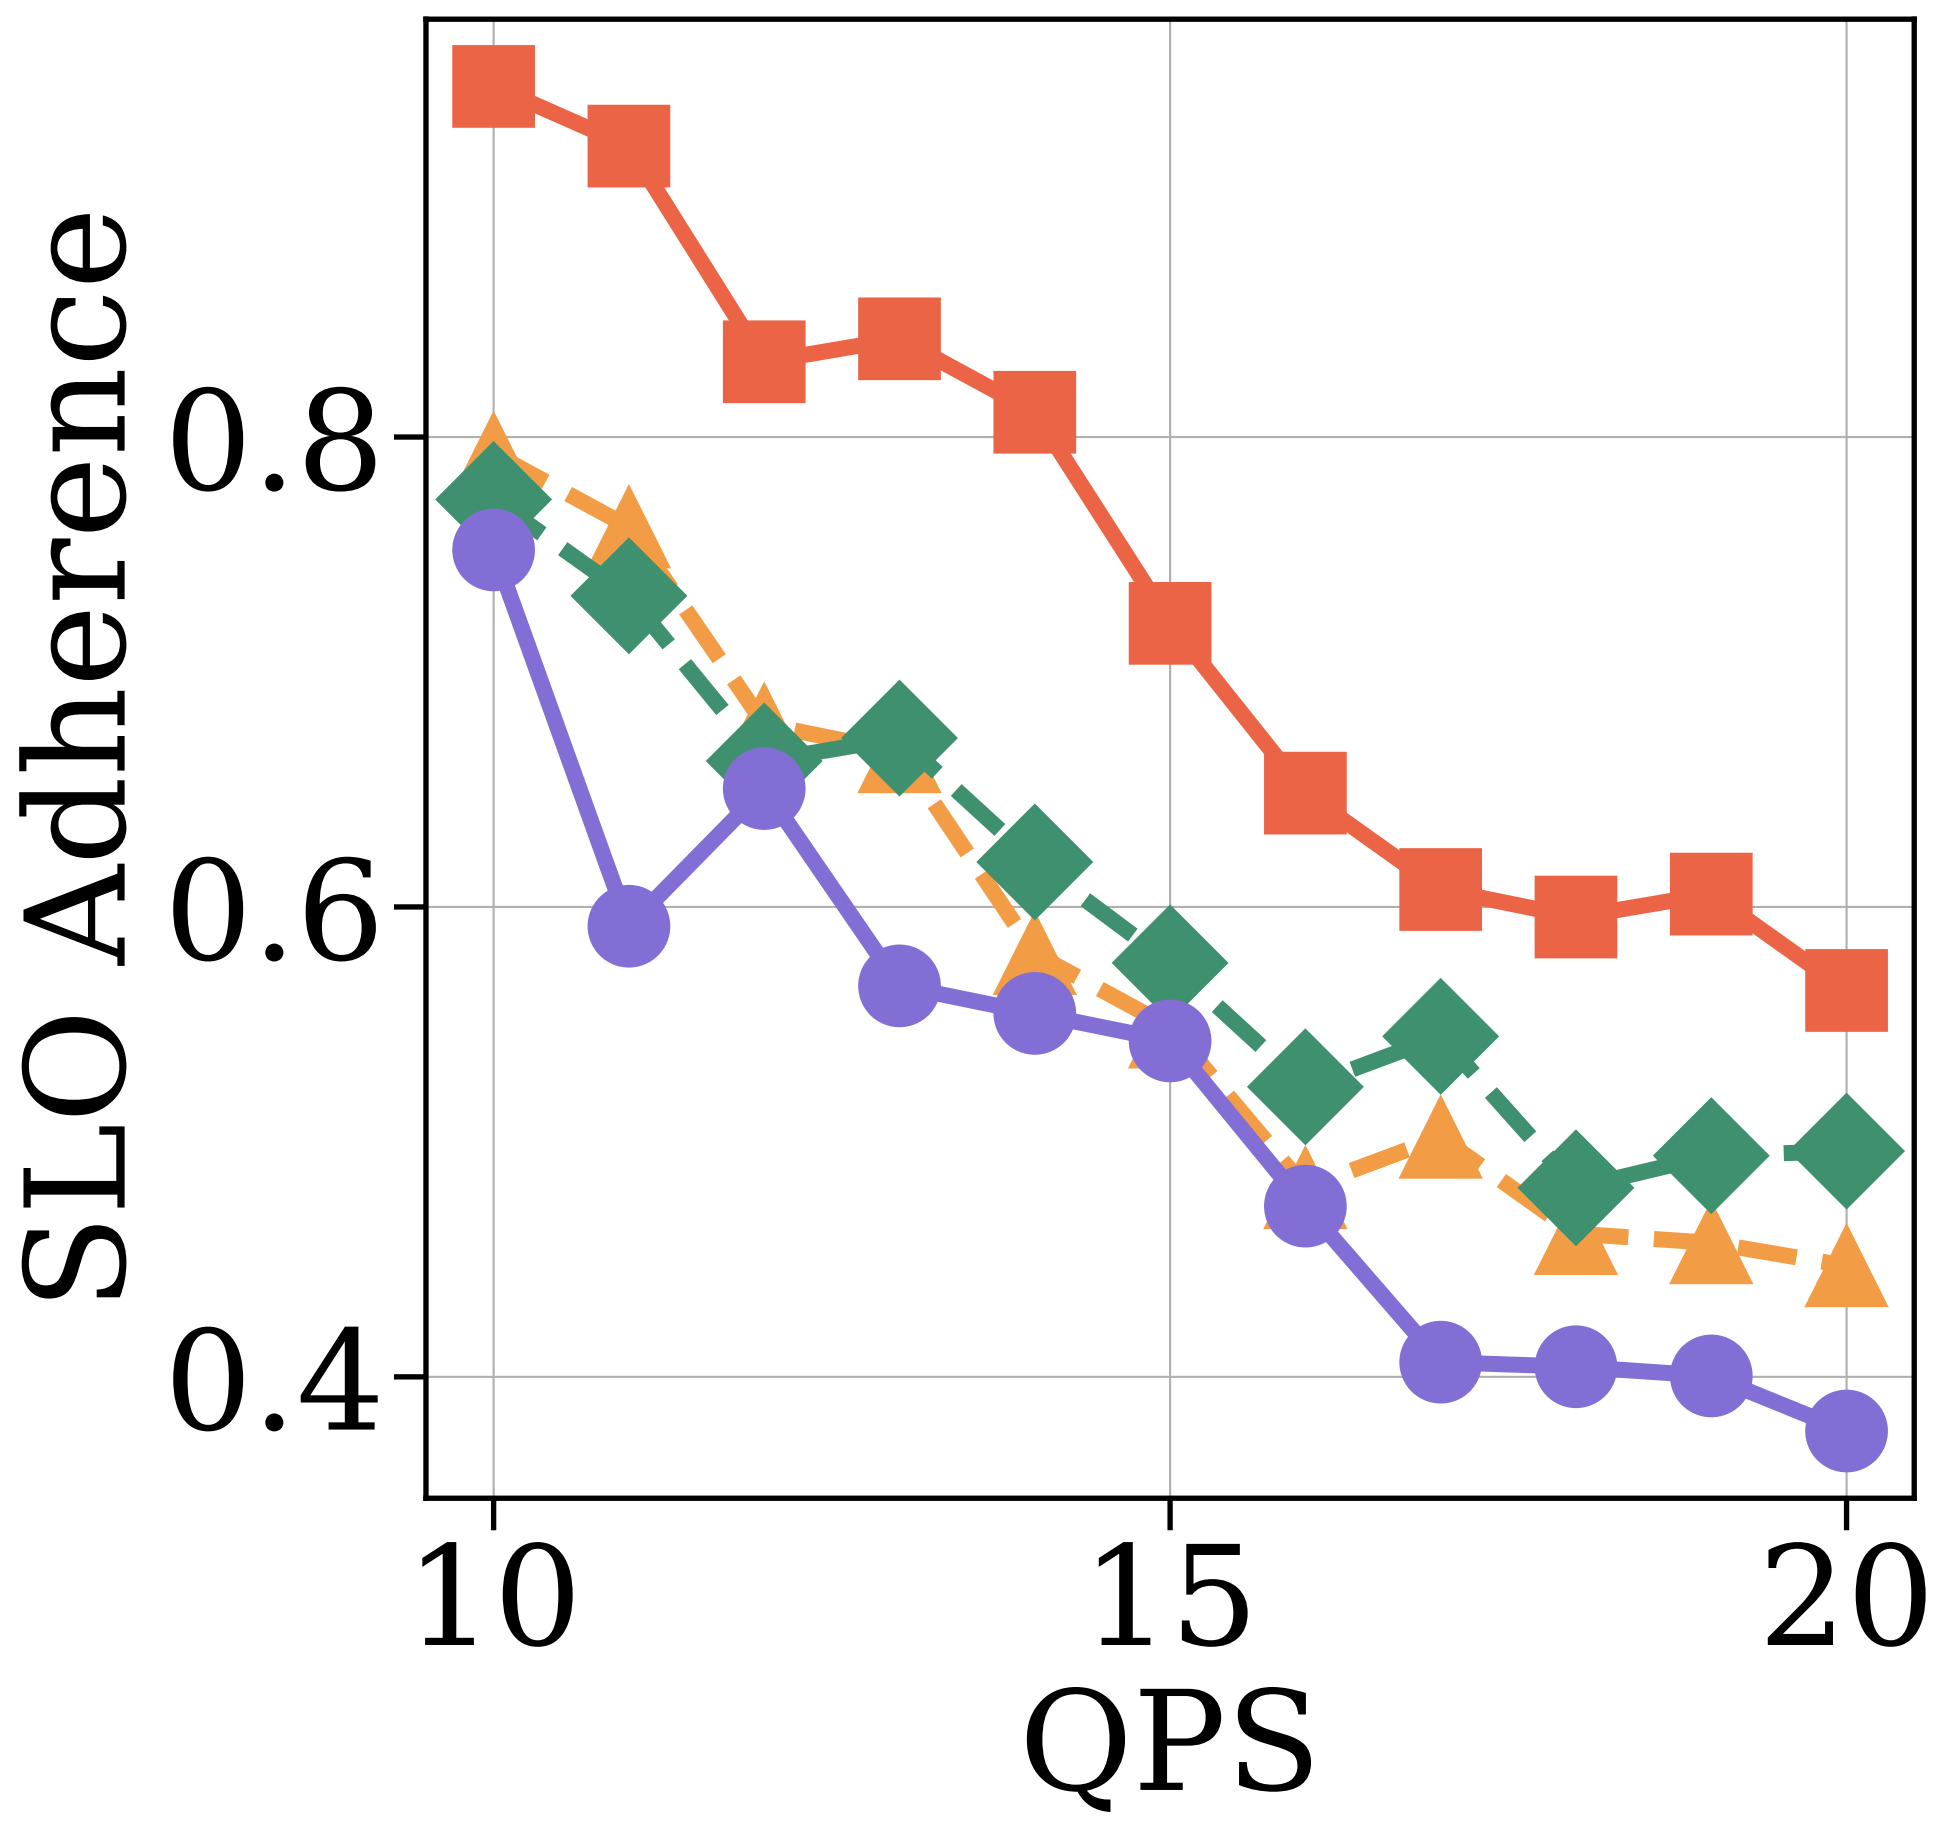

Supplement: supplementary_material [file slo_adherence_vs_qps.pdf › scorpio/draw/gemma27b-lmsys/exp1_qps_scaling/slo_adherence_vs_qps.pdf]

 Scorpio(Ours)     vLLM     Mooncake     S3

Supplement: supplementary_material [file slo_goodput_legend.pdf › scorpio/draw/gemma27b-lmsys/exp2_trace/slo_goodput_legend.pdf]

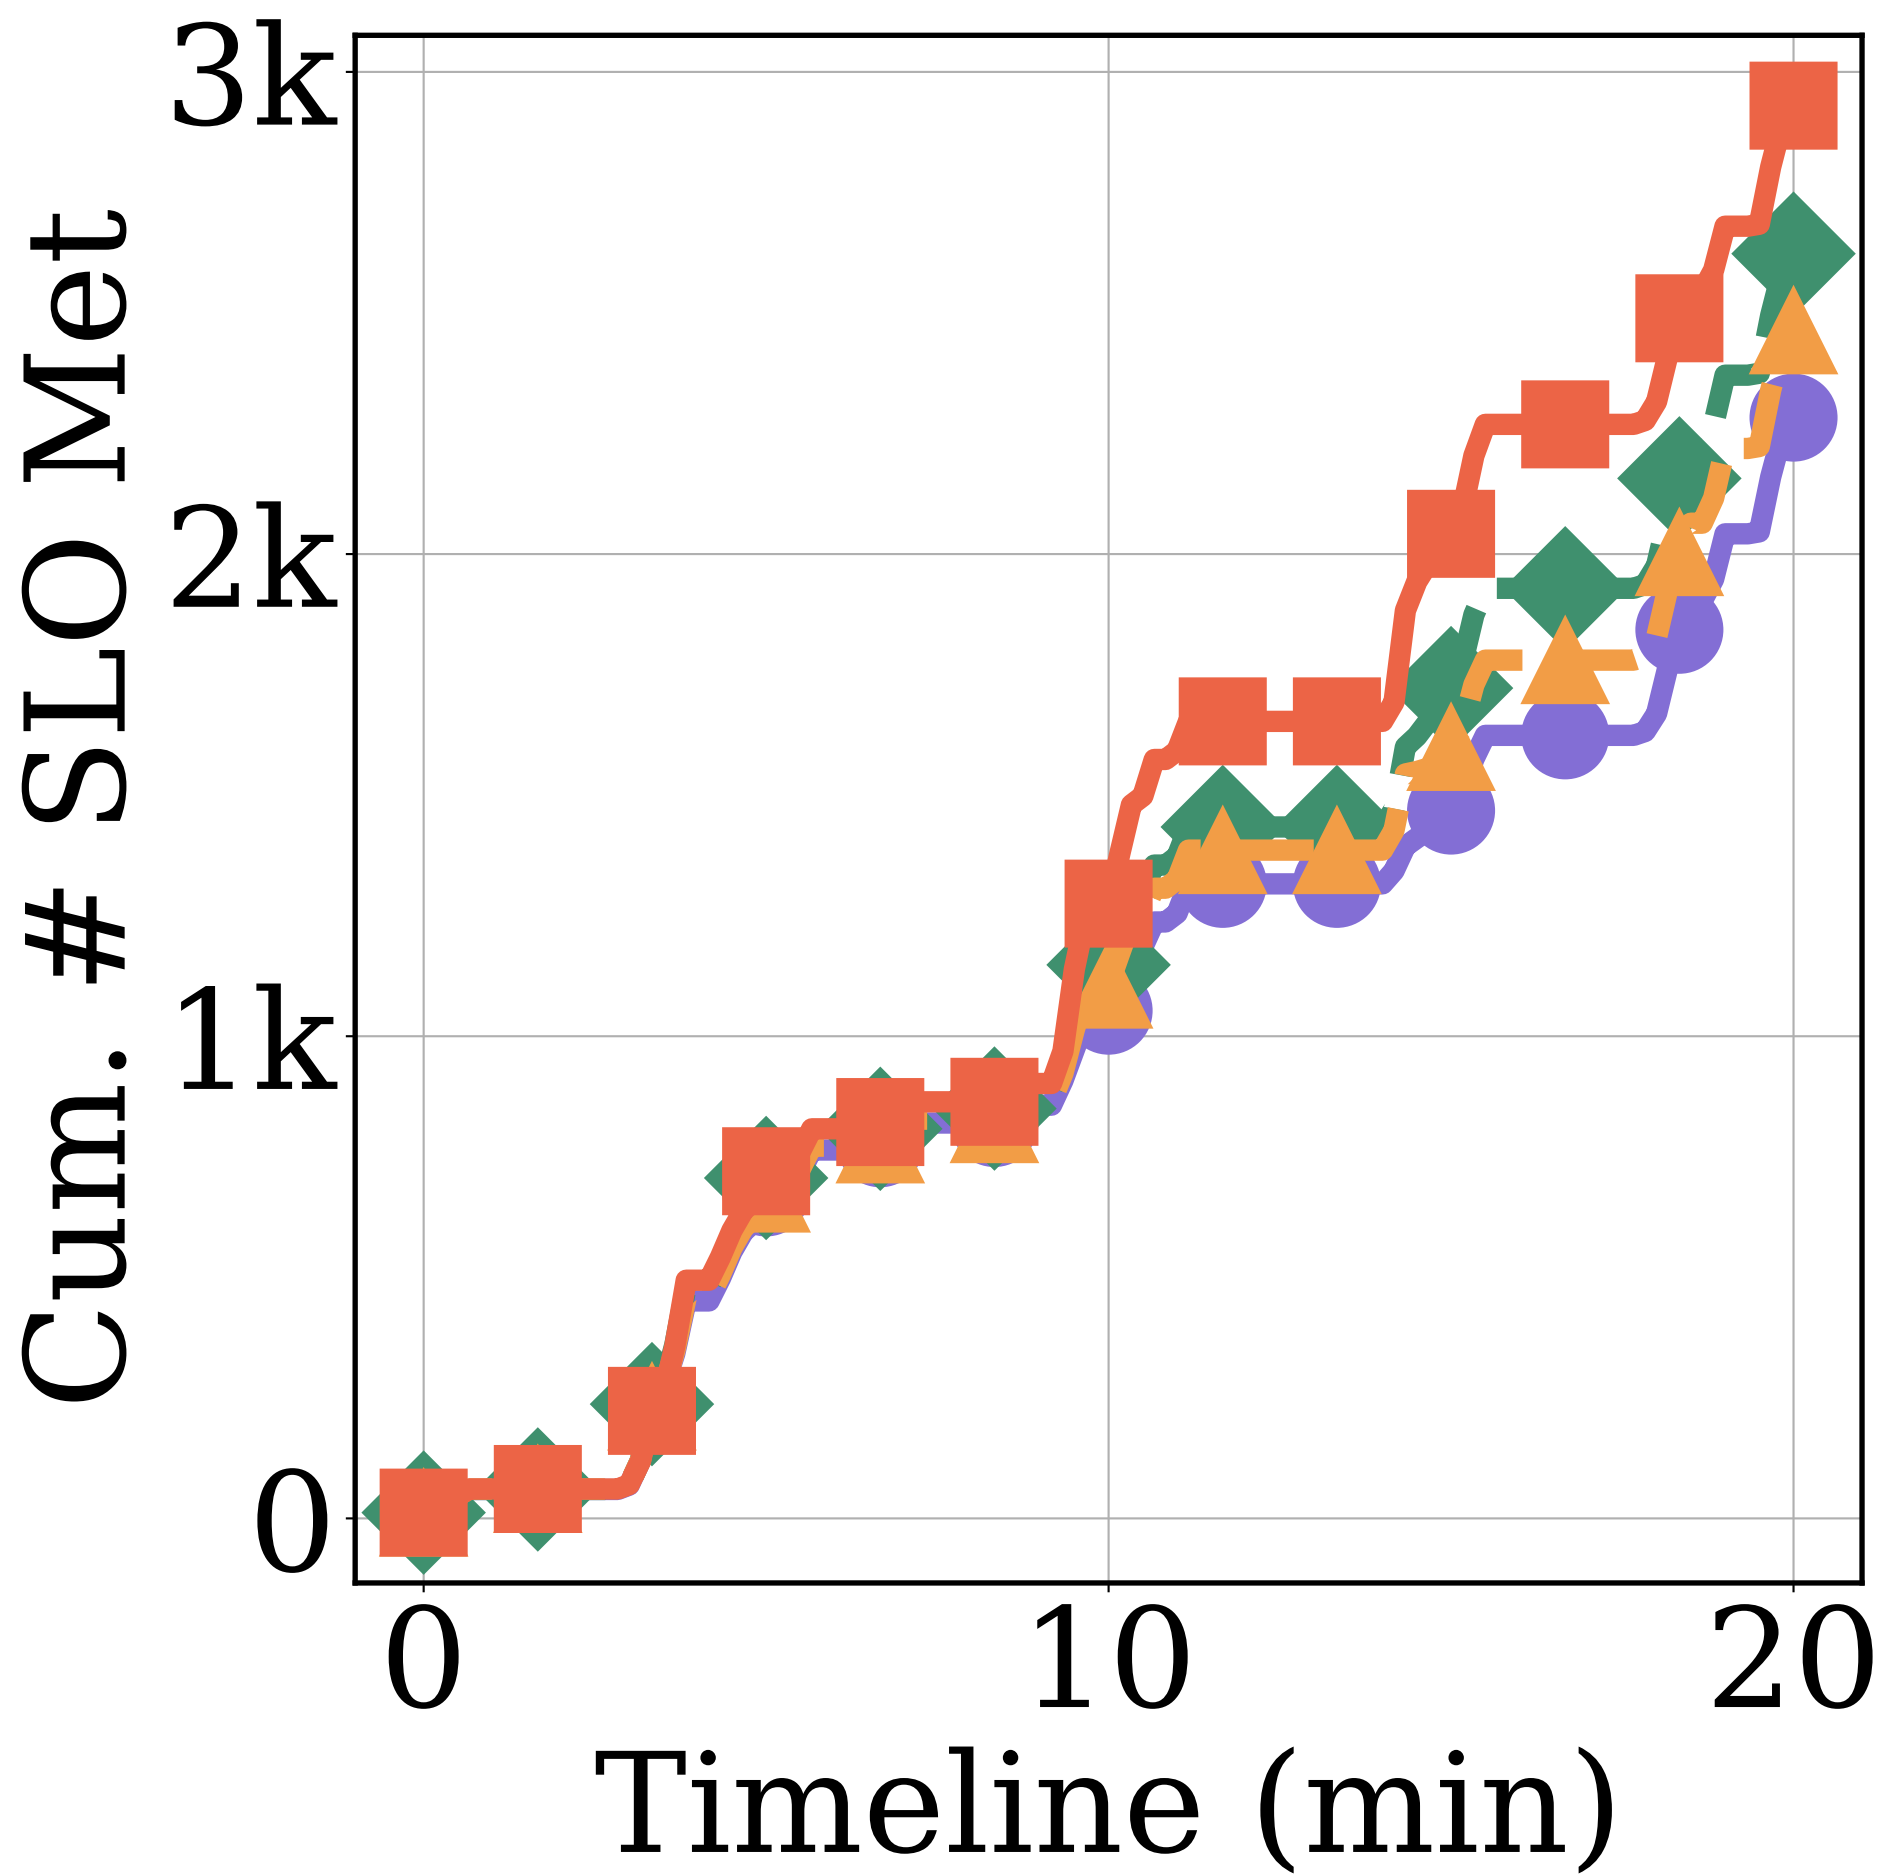

Supplement: supplementary_material [file slo_met_over_time_cdf.pdf › scorpio/draw/gemma27b-lmsys/exp2_trace/slo_met_over_time_cdf.pdf]

# of Violation

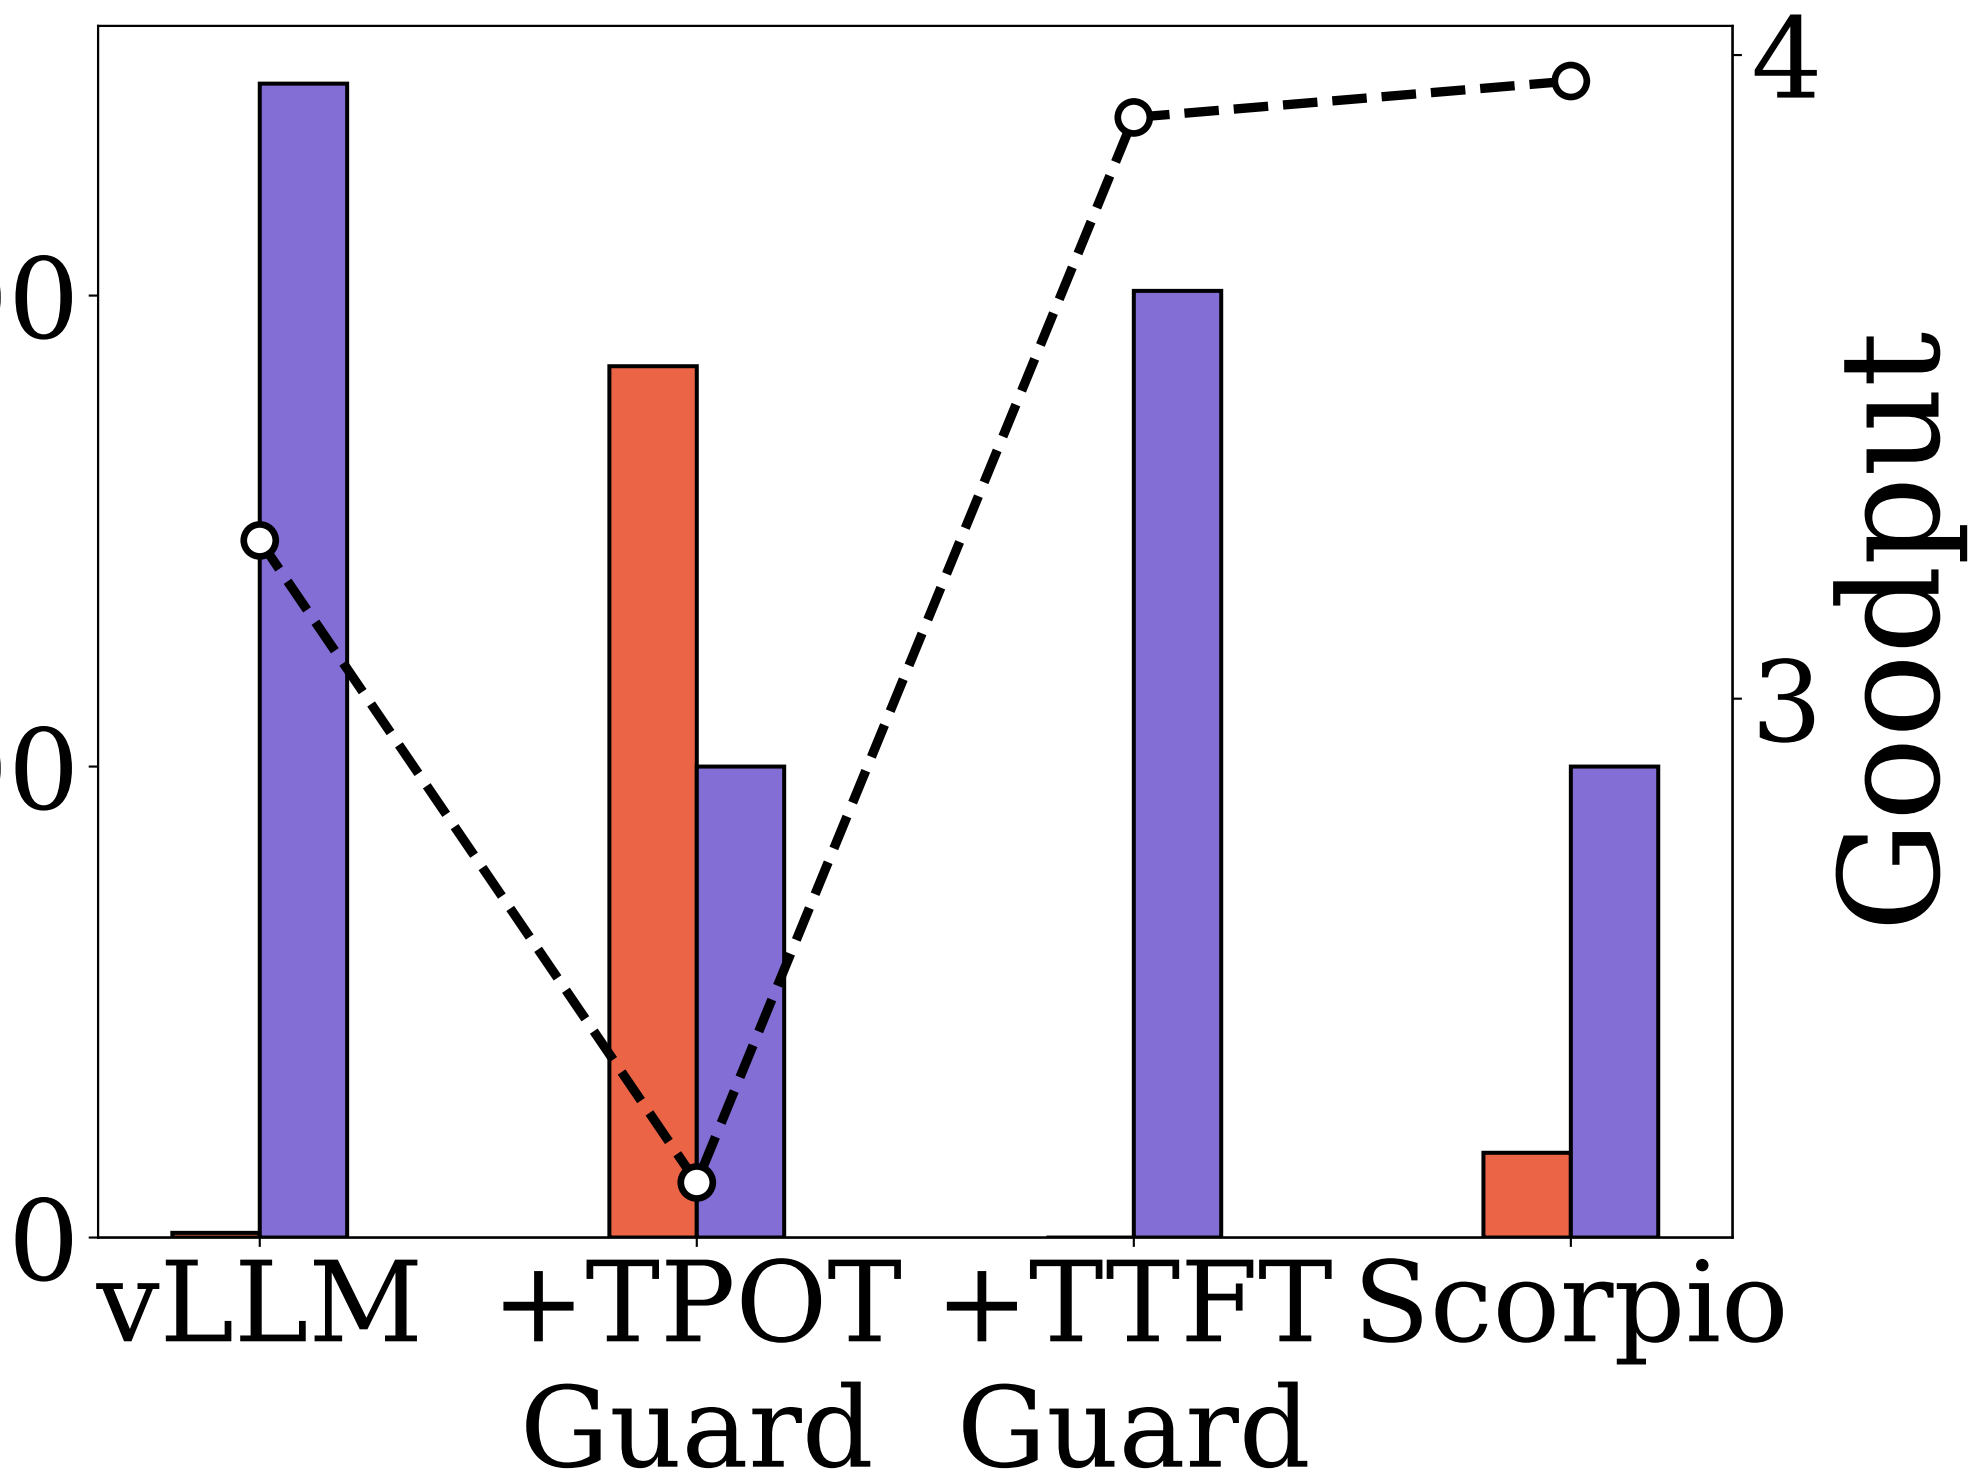

Supplement: supplementary_material [file ablation.pdf › scorpio/draw/gemma27b-lmsys/exp3_ablation/ablation.pdf]

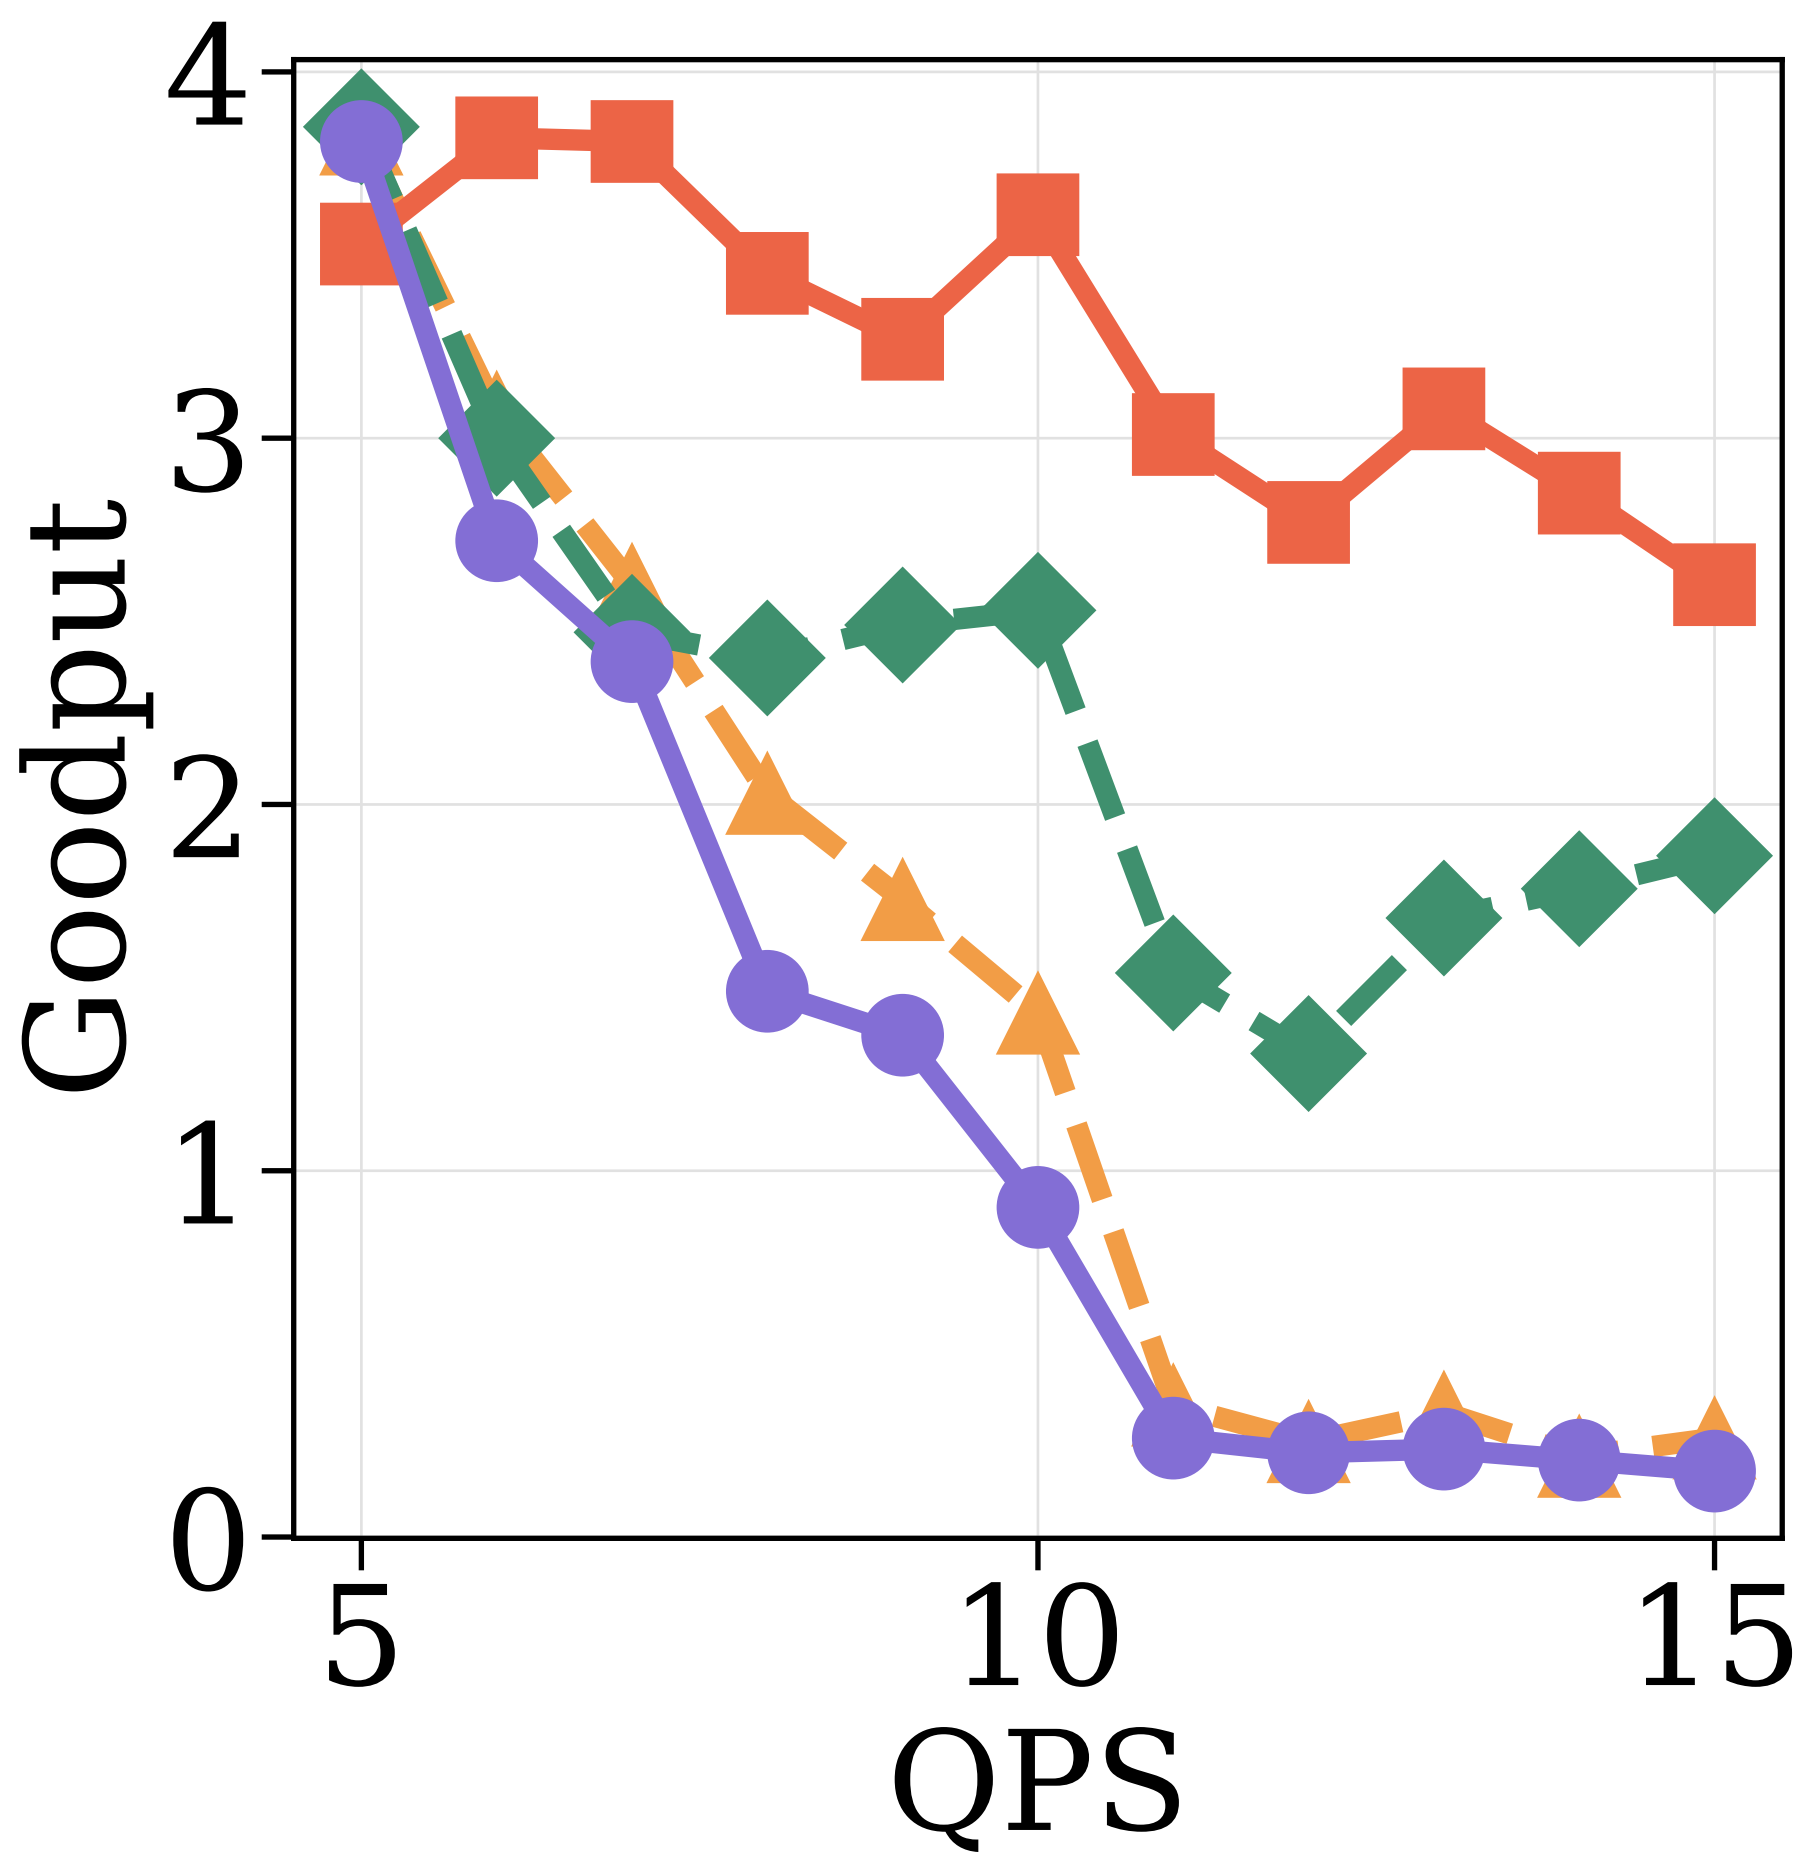

Supplement: supplementary_material [file goodput_vs_qps.pdf › scorpio/draw/gemma27b-sharegpt/exp1_qps_scaling/goodput_vs_qps.pdf]

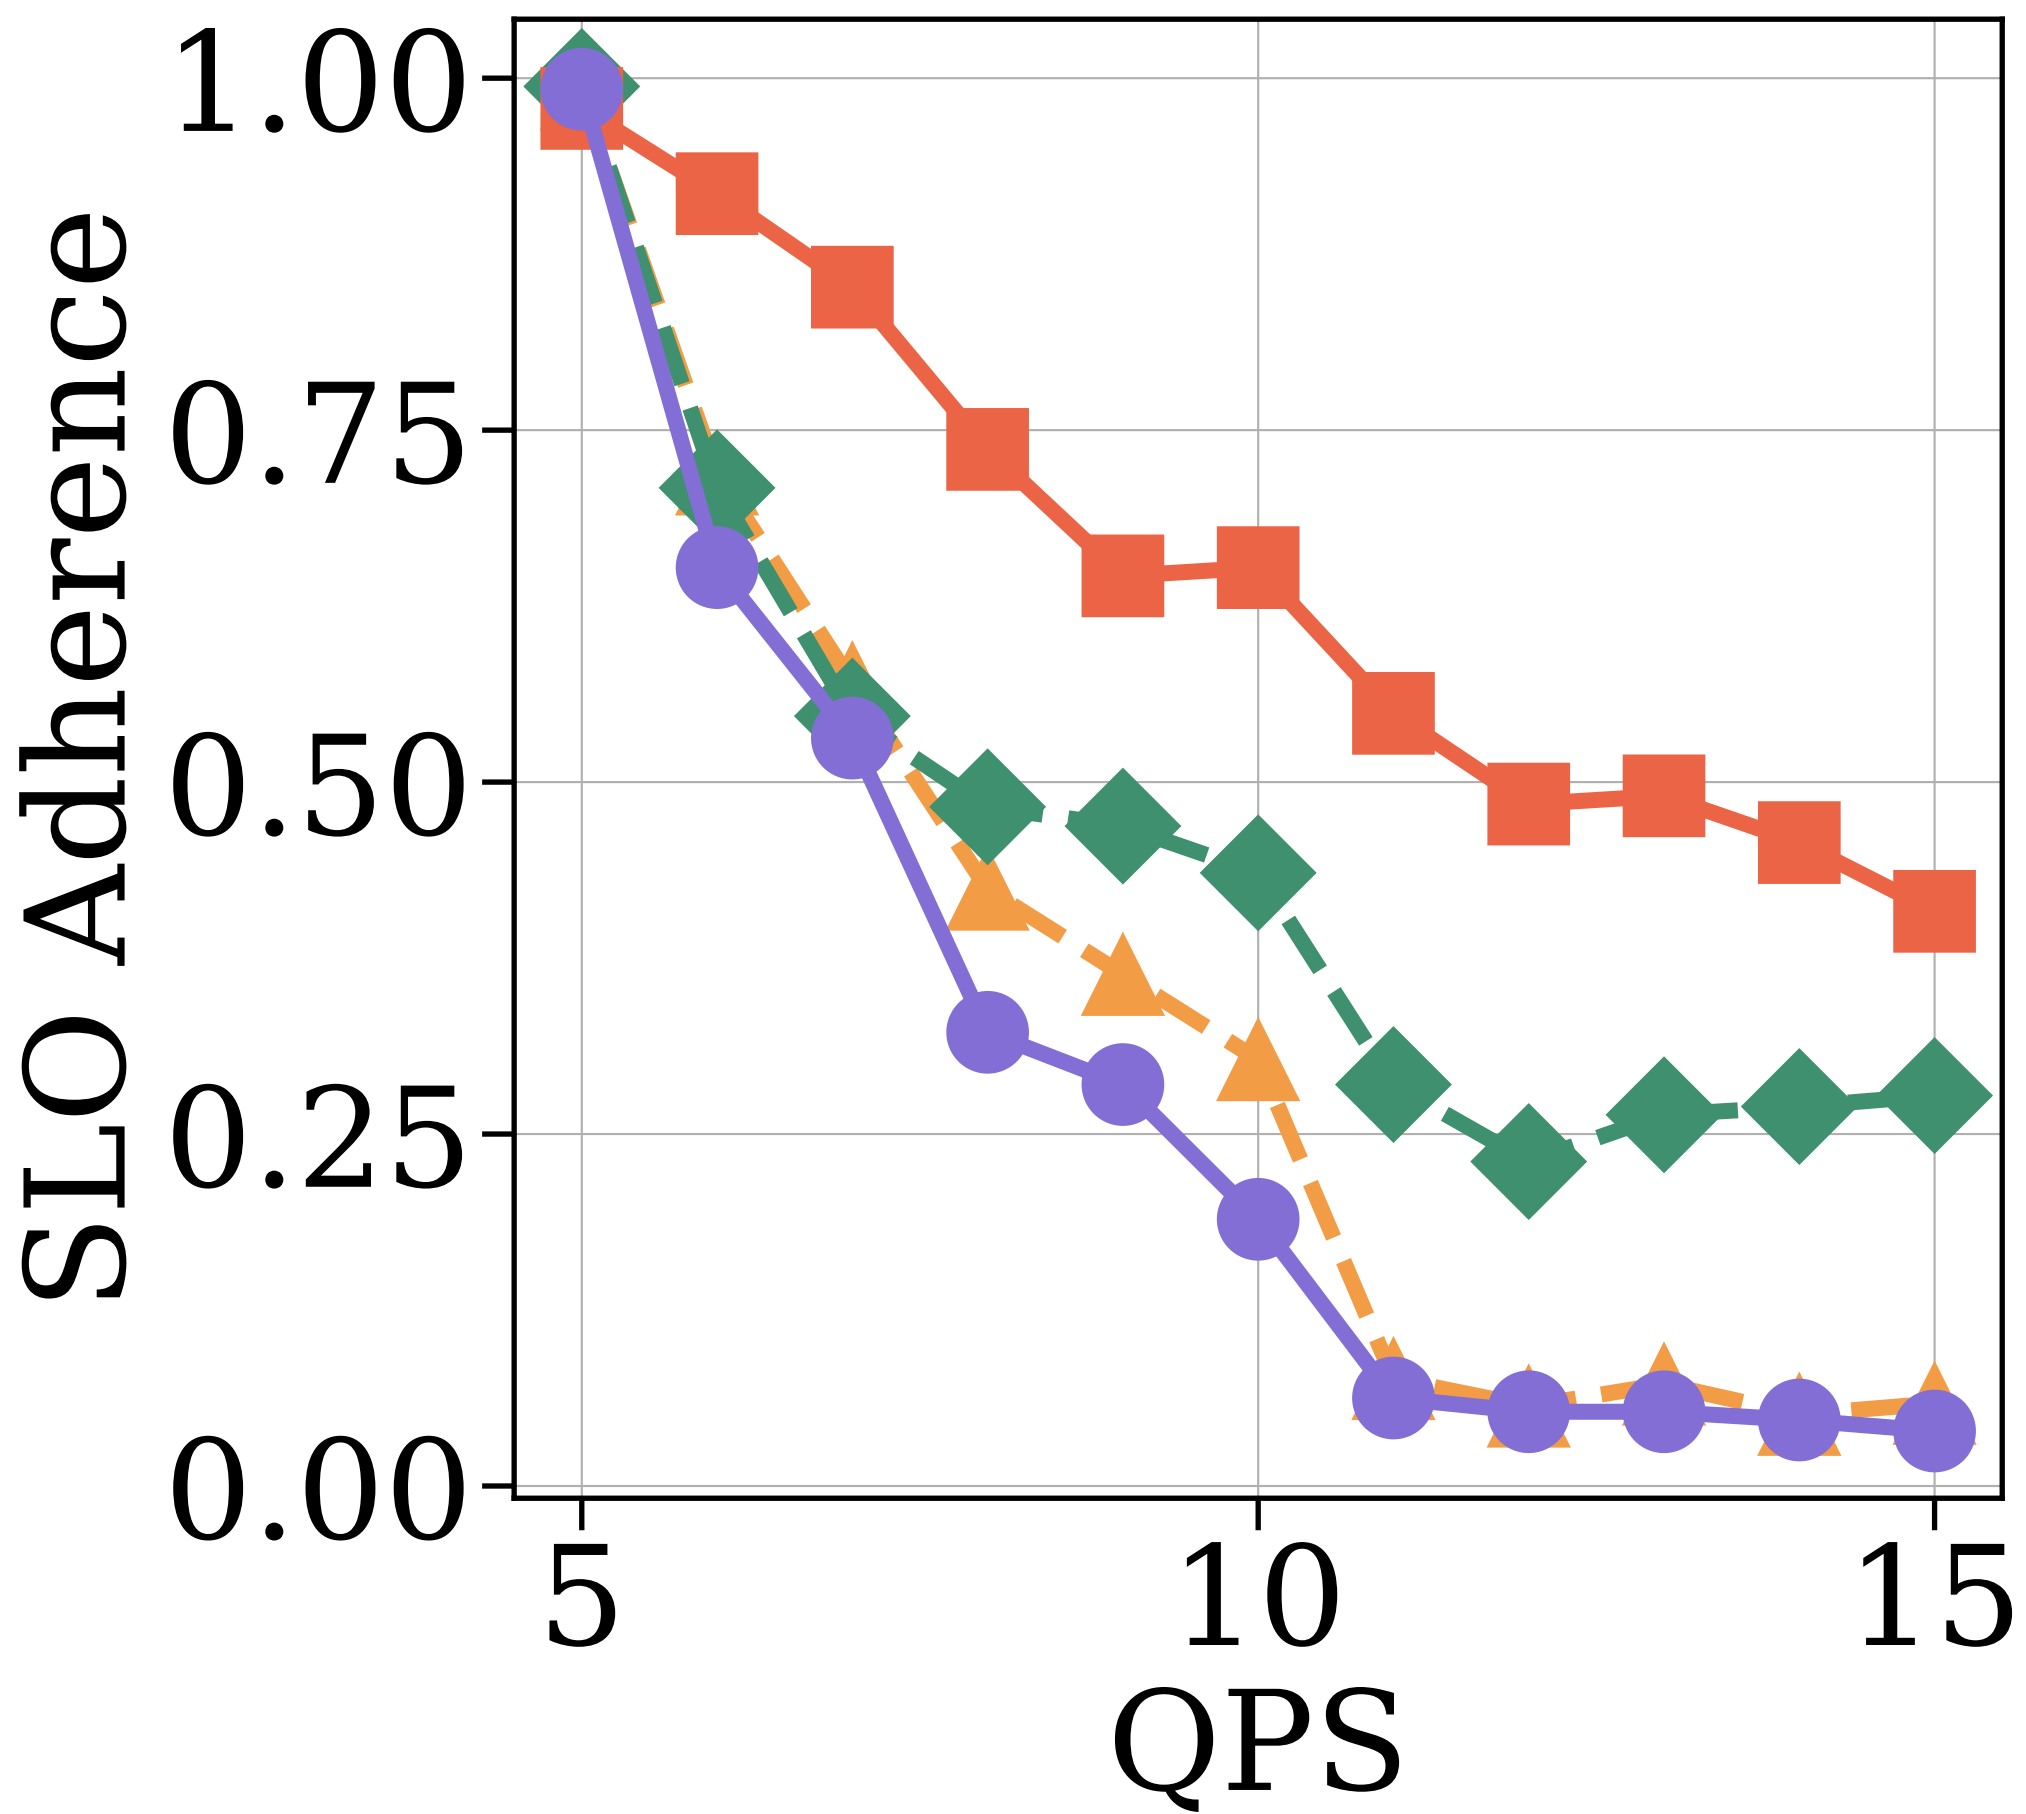

Supplement: supplementary_material [file slo_adherence_vs_qps.pdf › scorpio/draw/gemma27b-sharegpt/exp1_qps_scaling/slo_adherence_vs_qps.pdf]

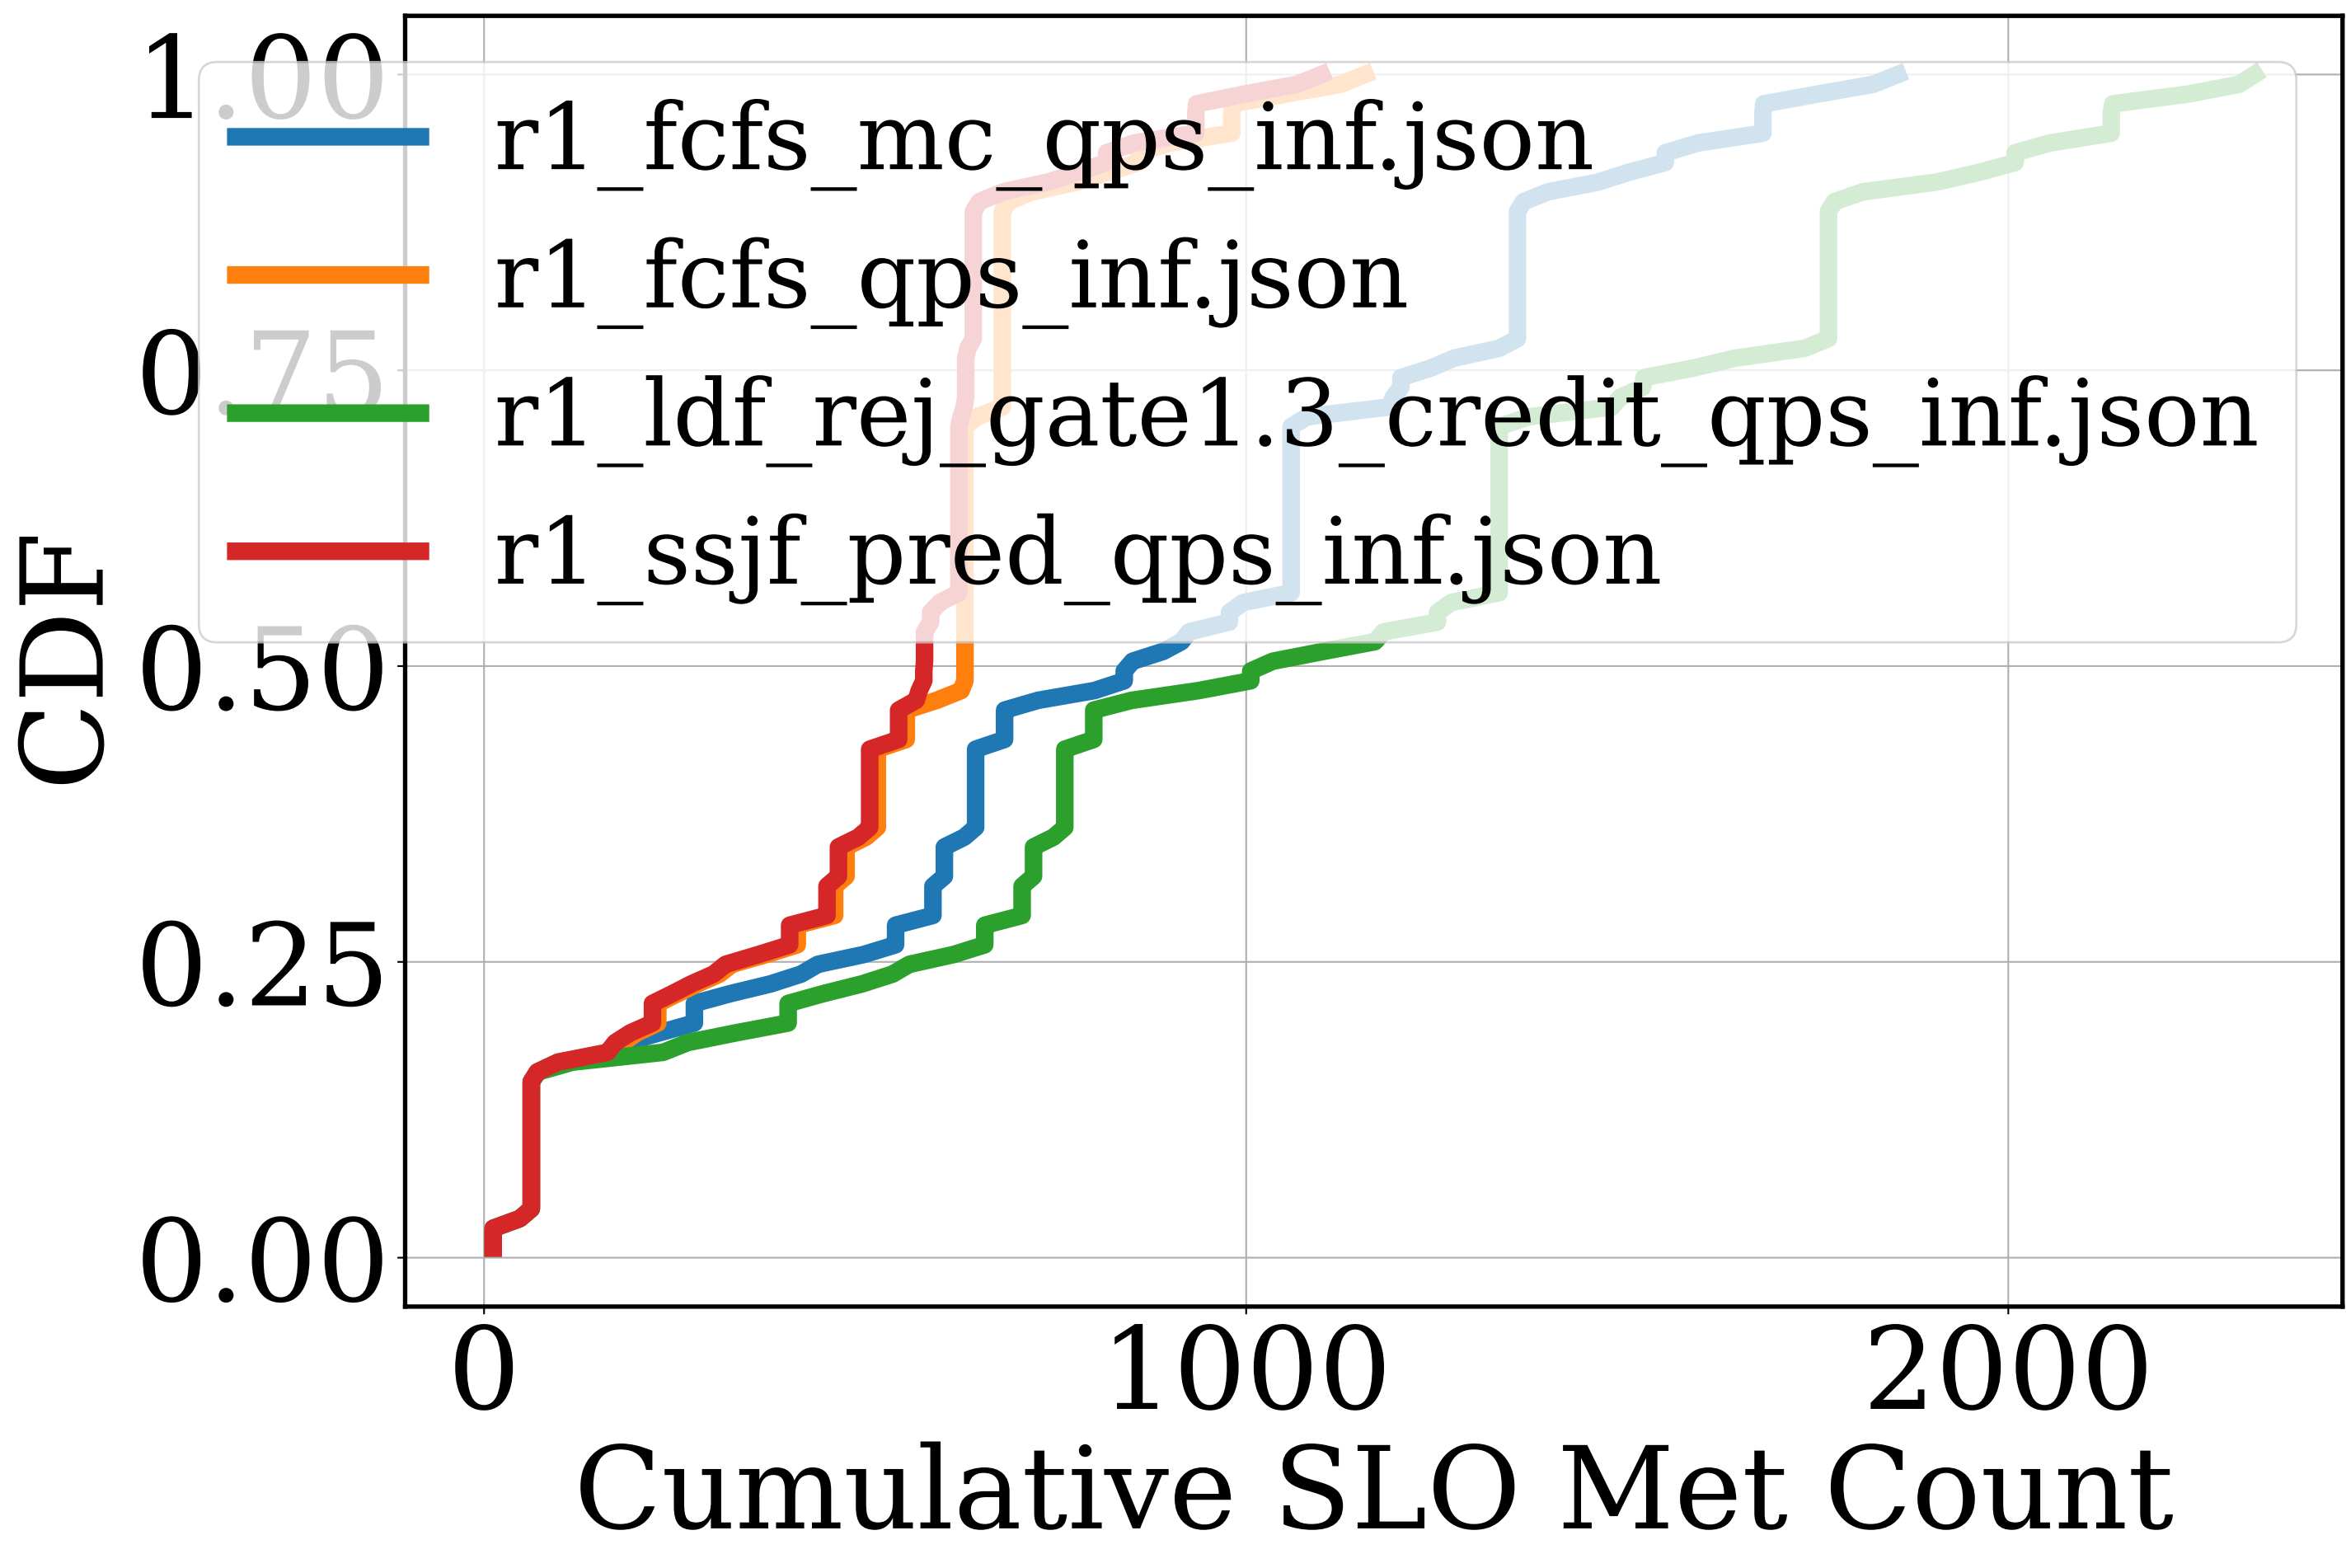

Supplement: supplementary_material [file cumulative_slo_met_cdf.pdf › scorpio/draw/gemma27b-sharegpt/exp2_trace/cumulative_slo_met_cdf.pdf]

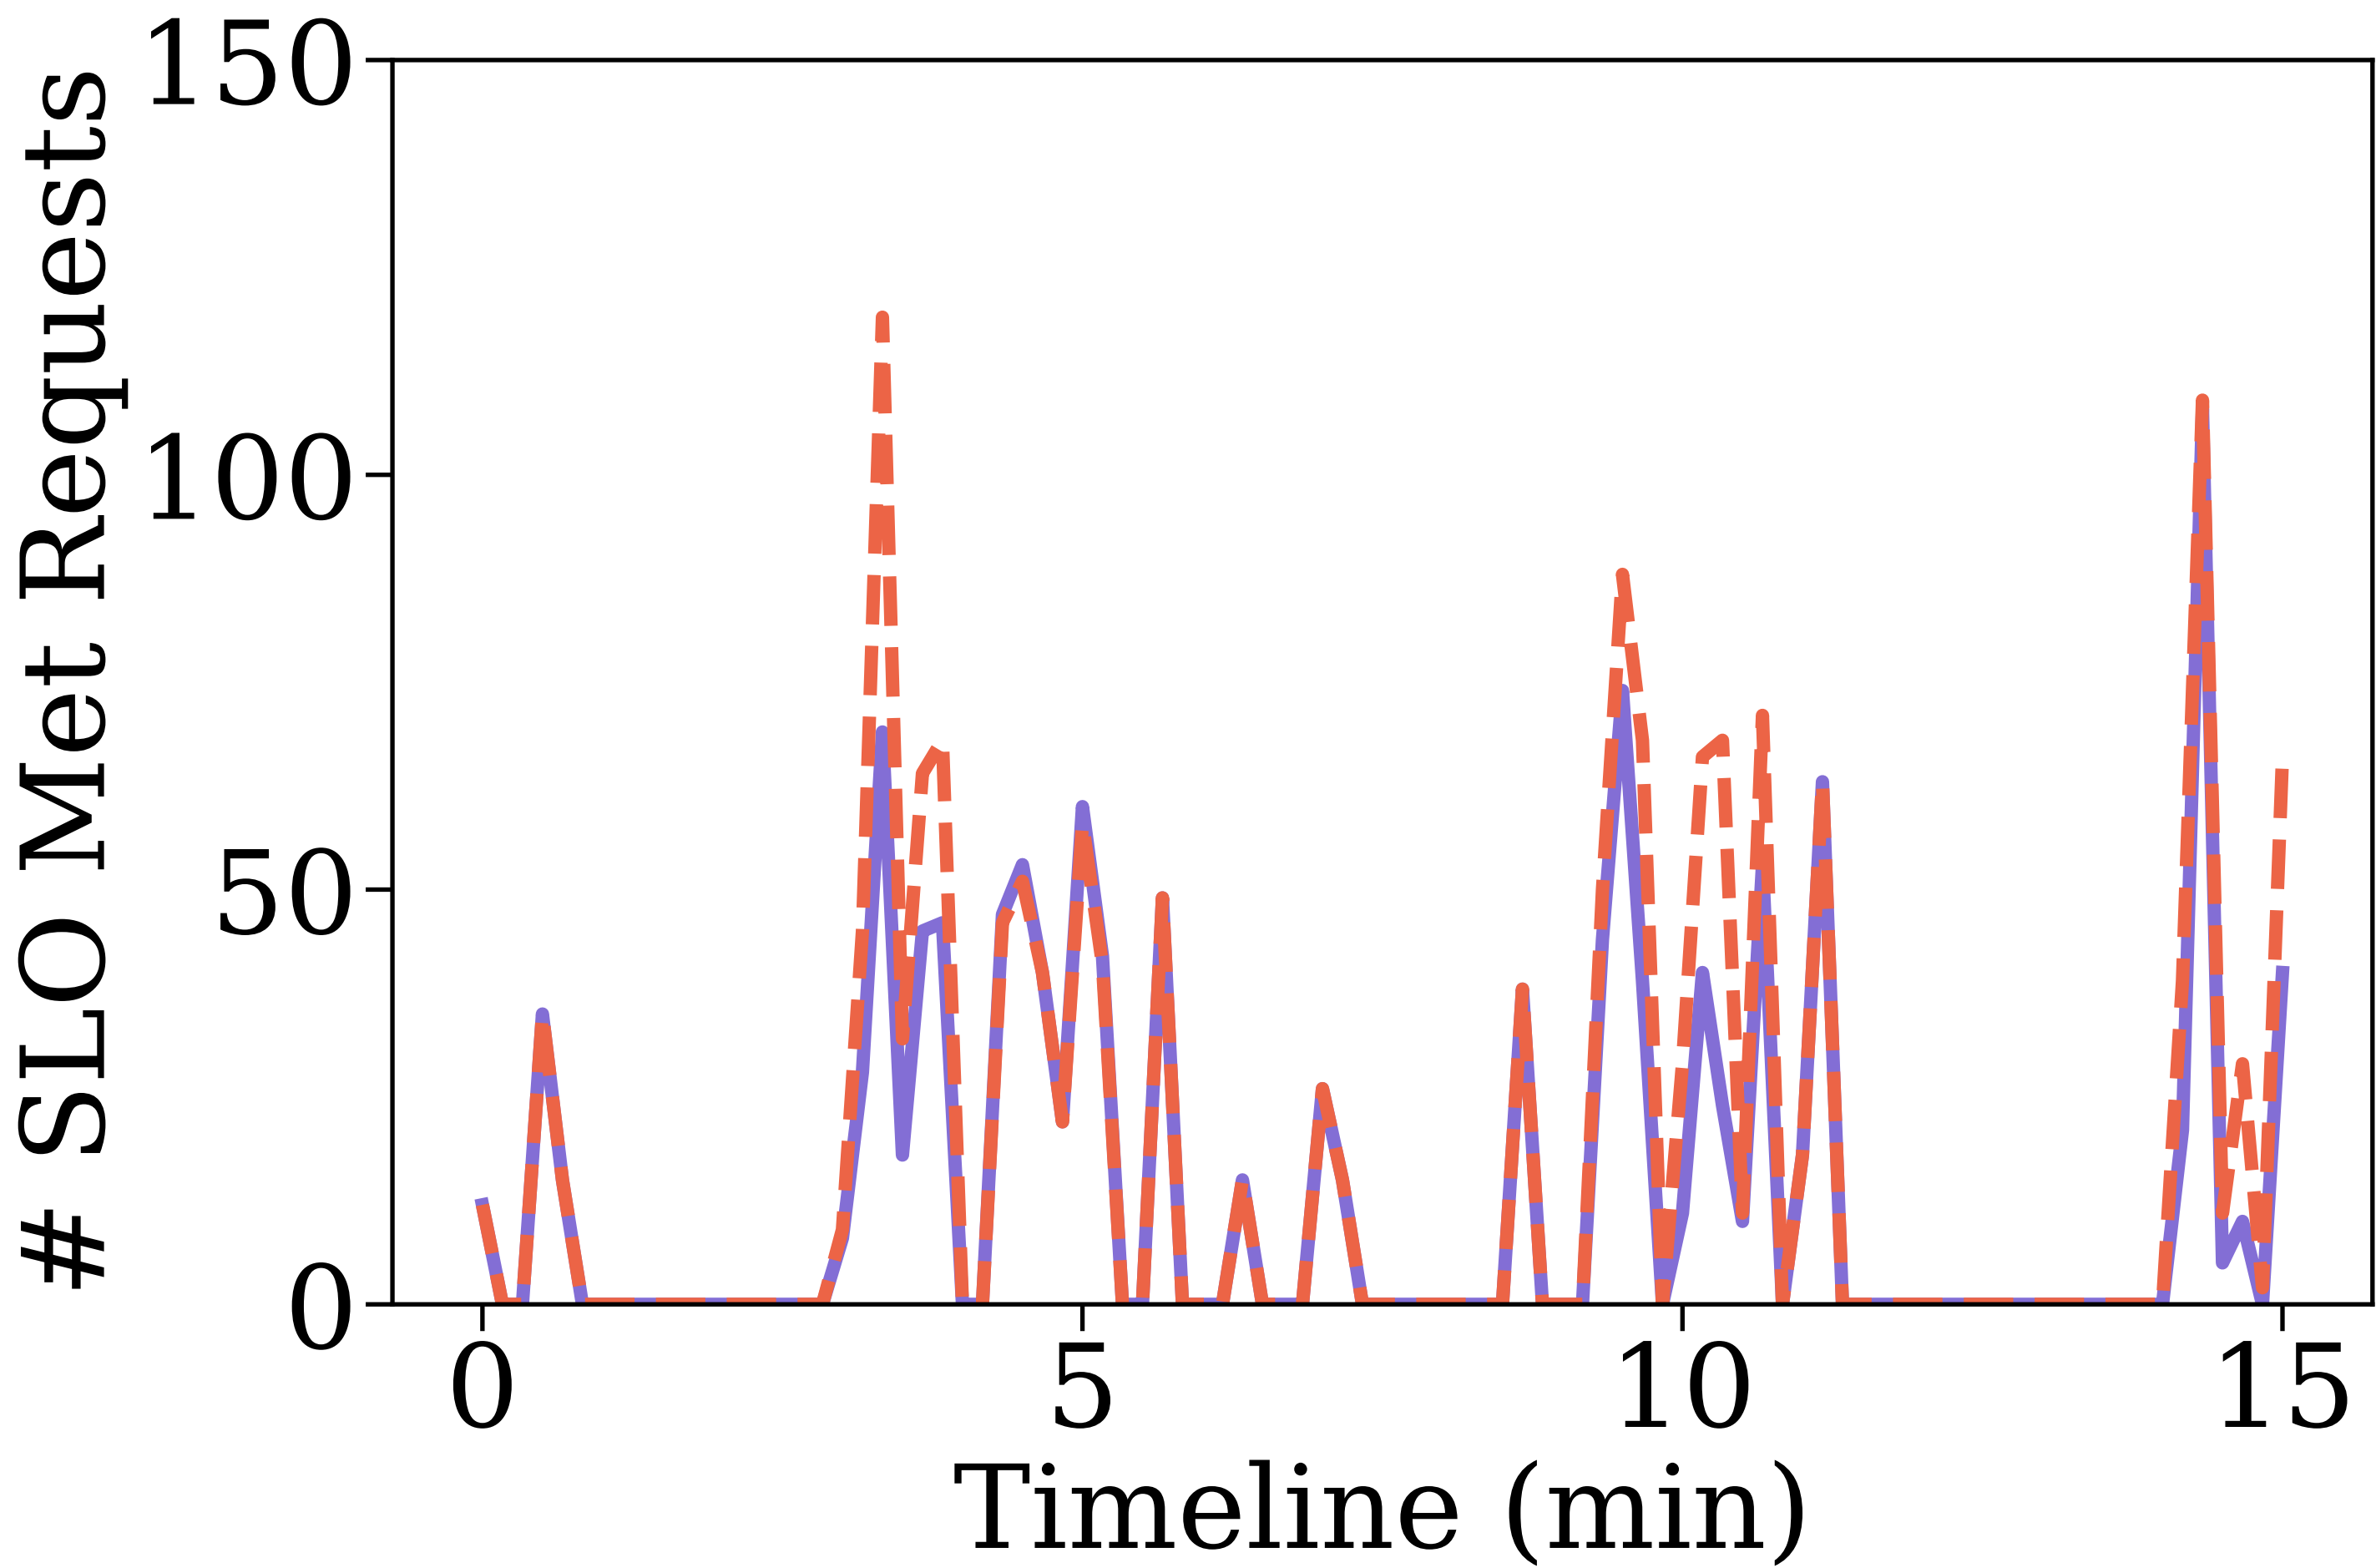

Supplement: supplementary_material [file r1_fcfs_mc_qps_inf.json_slo_met.pdf › scorpio/draw/gemma27b-sharegpt/exp2_trace/r1_fcfs_mc_qps_inf.json_slo_met.pdf]

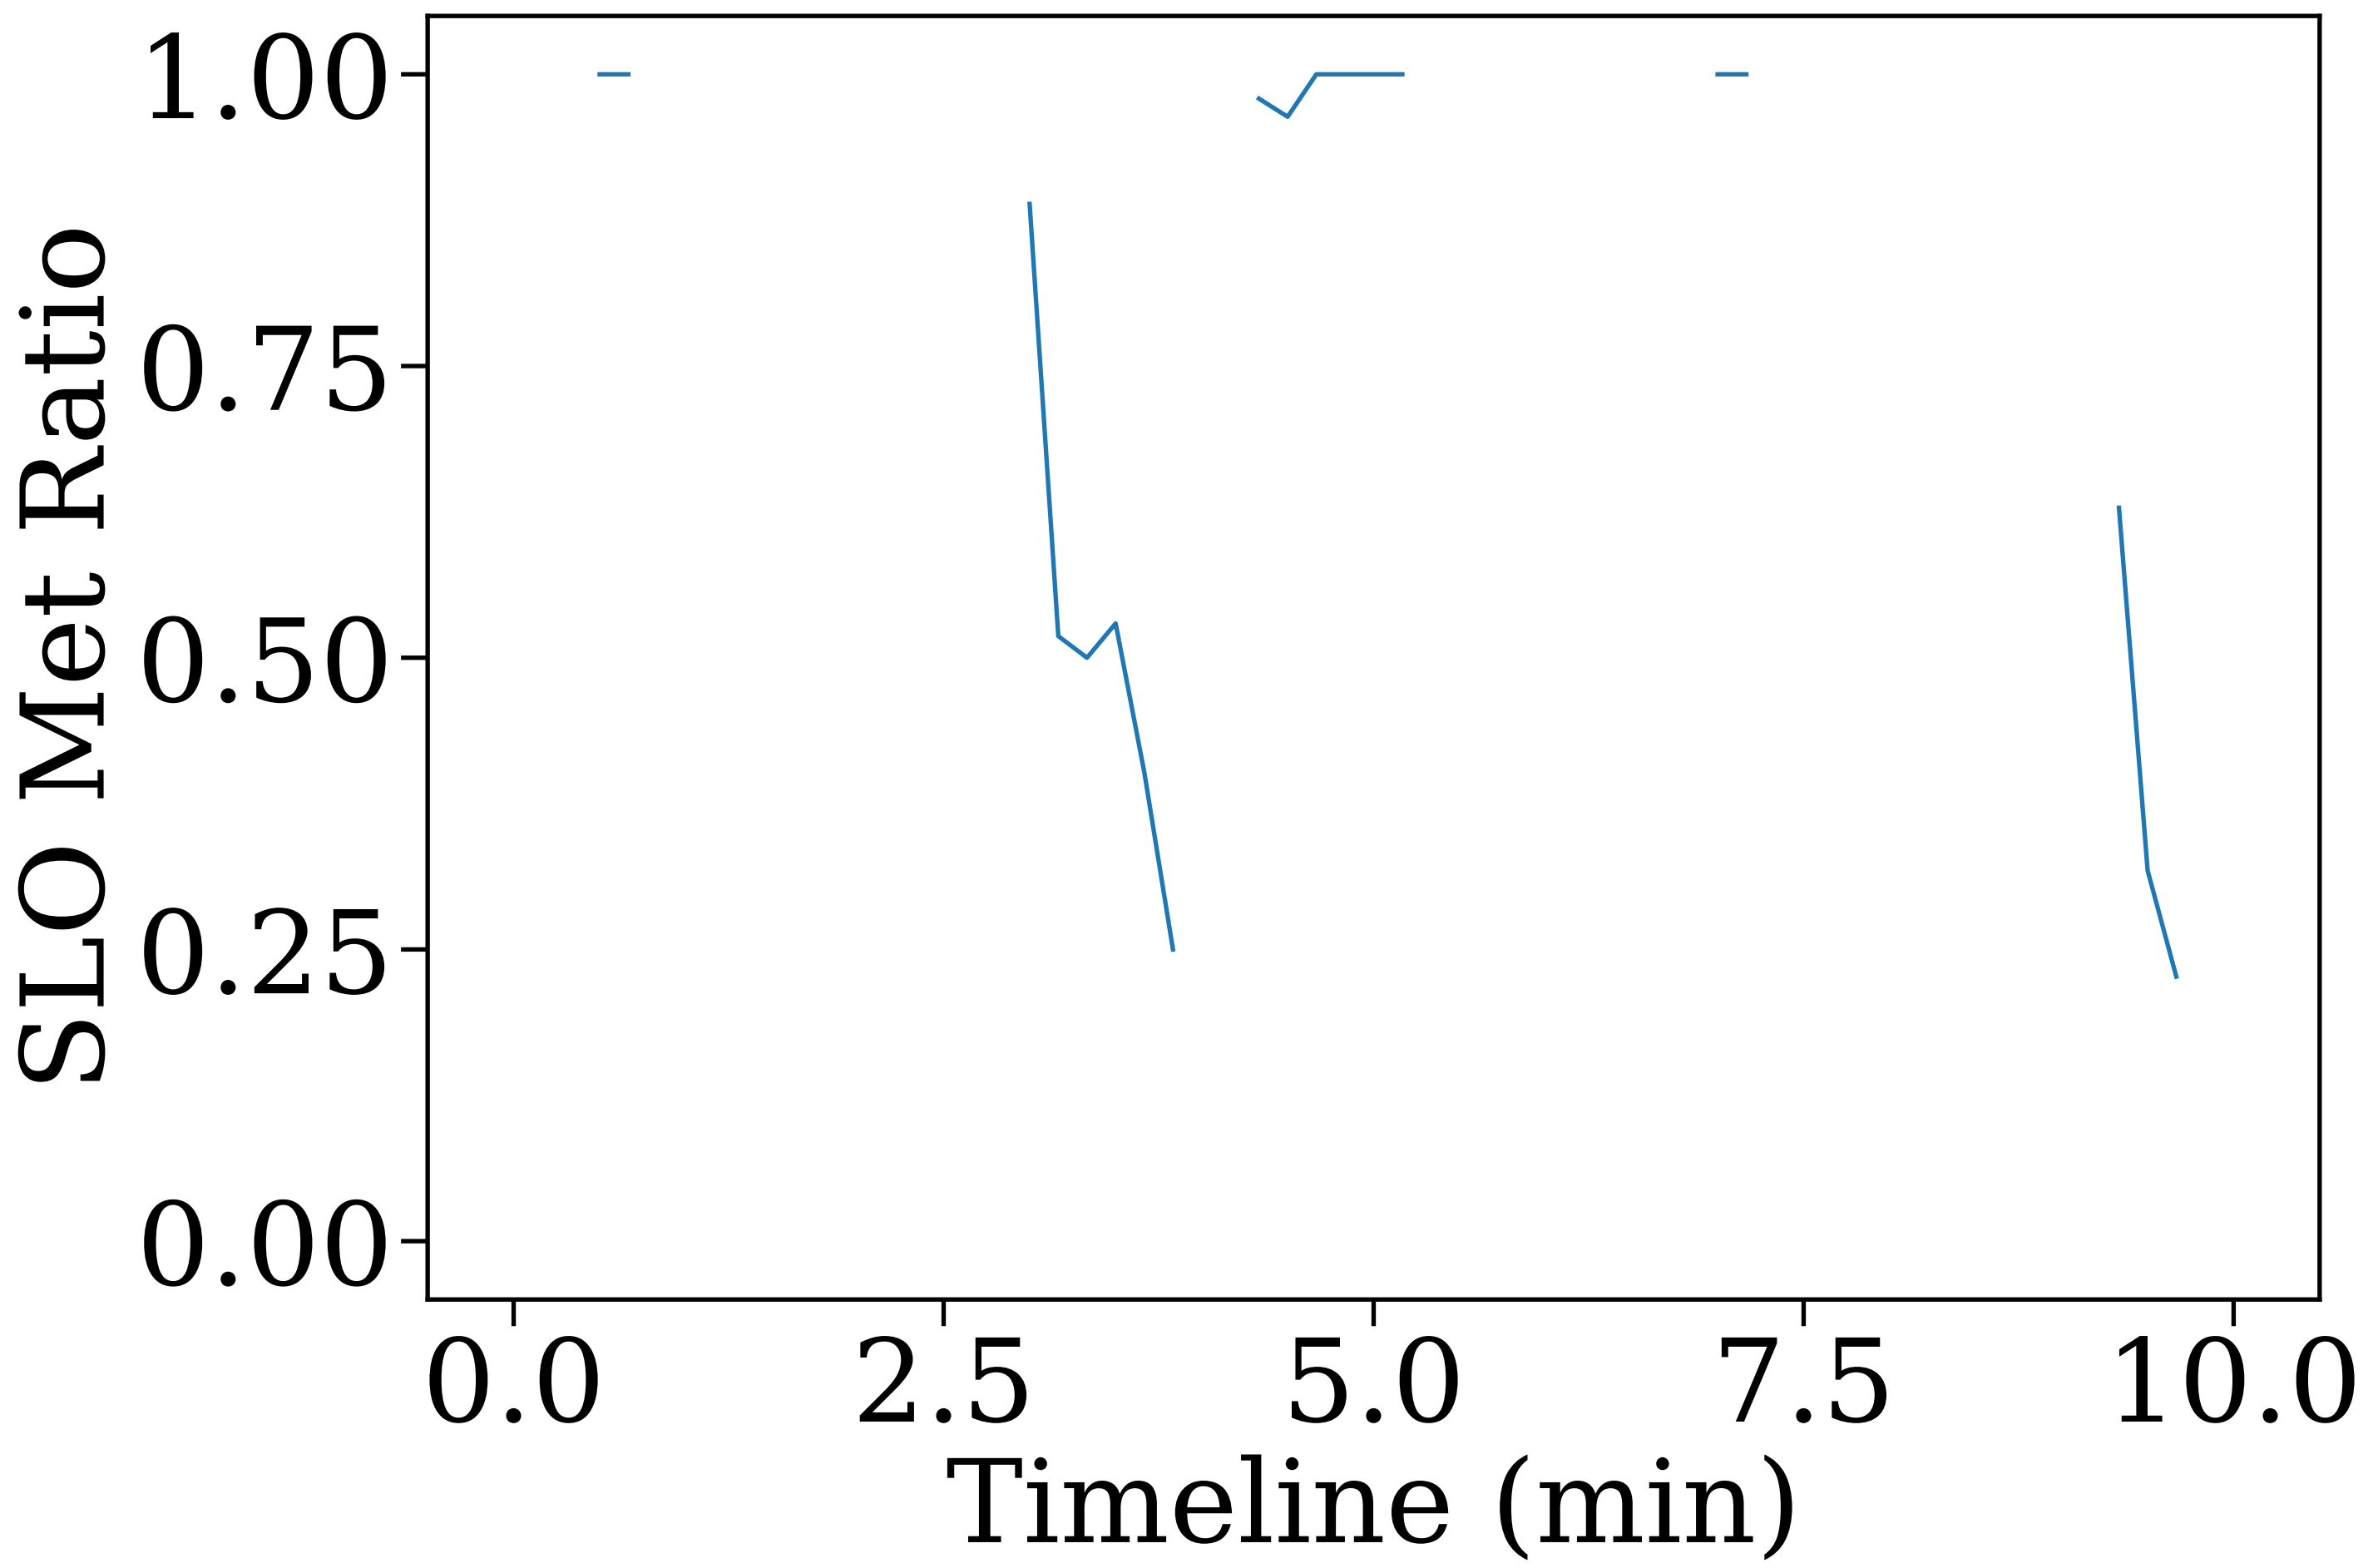

Supplement: supplementary_material [file r1_fcfs_mc_qps_inf.json_slo_met_ratio.pdf › scorpio/draw/gemma27b-sharegpt/exp2_trace/r1_fcfs_mc_qps_inf.json_slo_met_ratio.pdf]

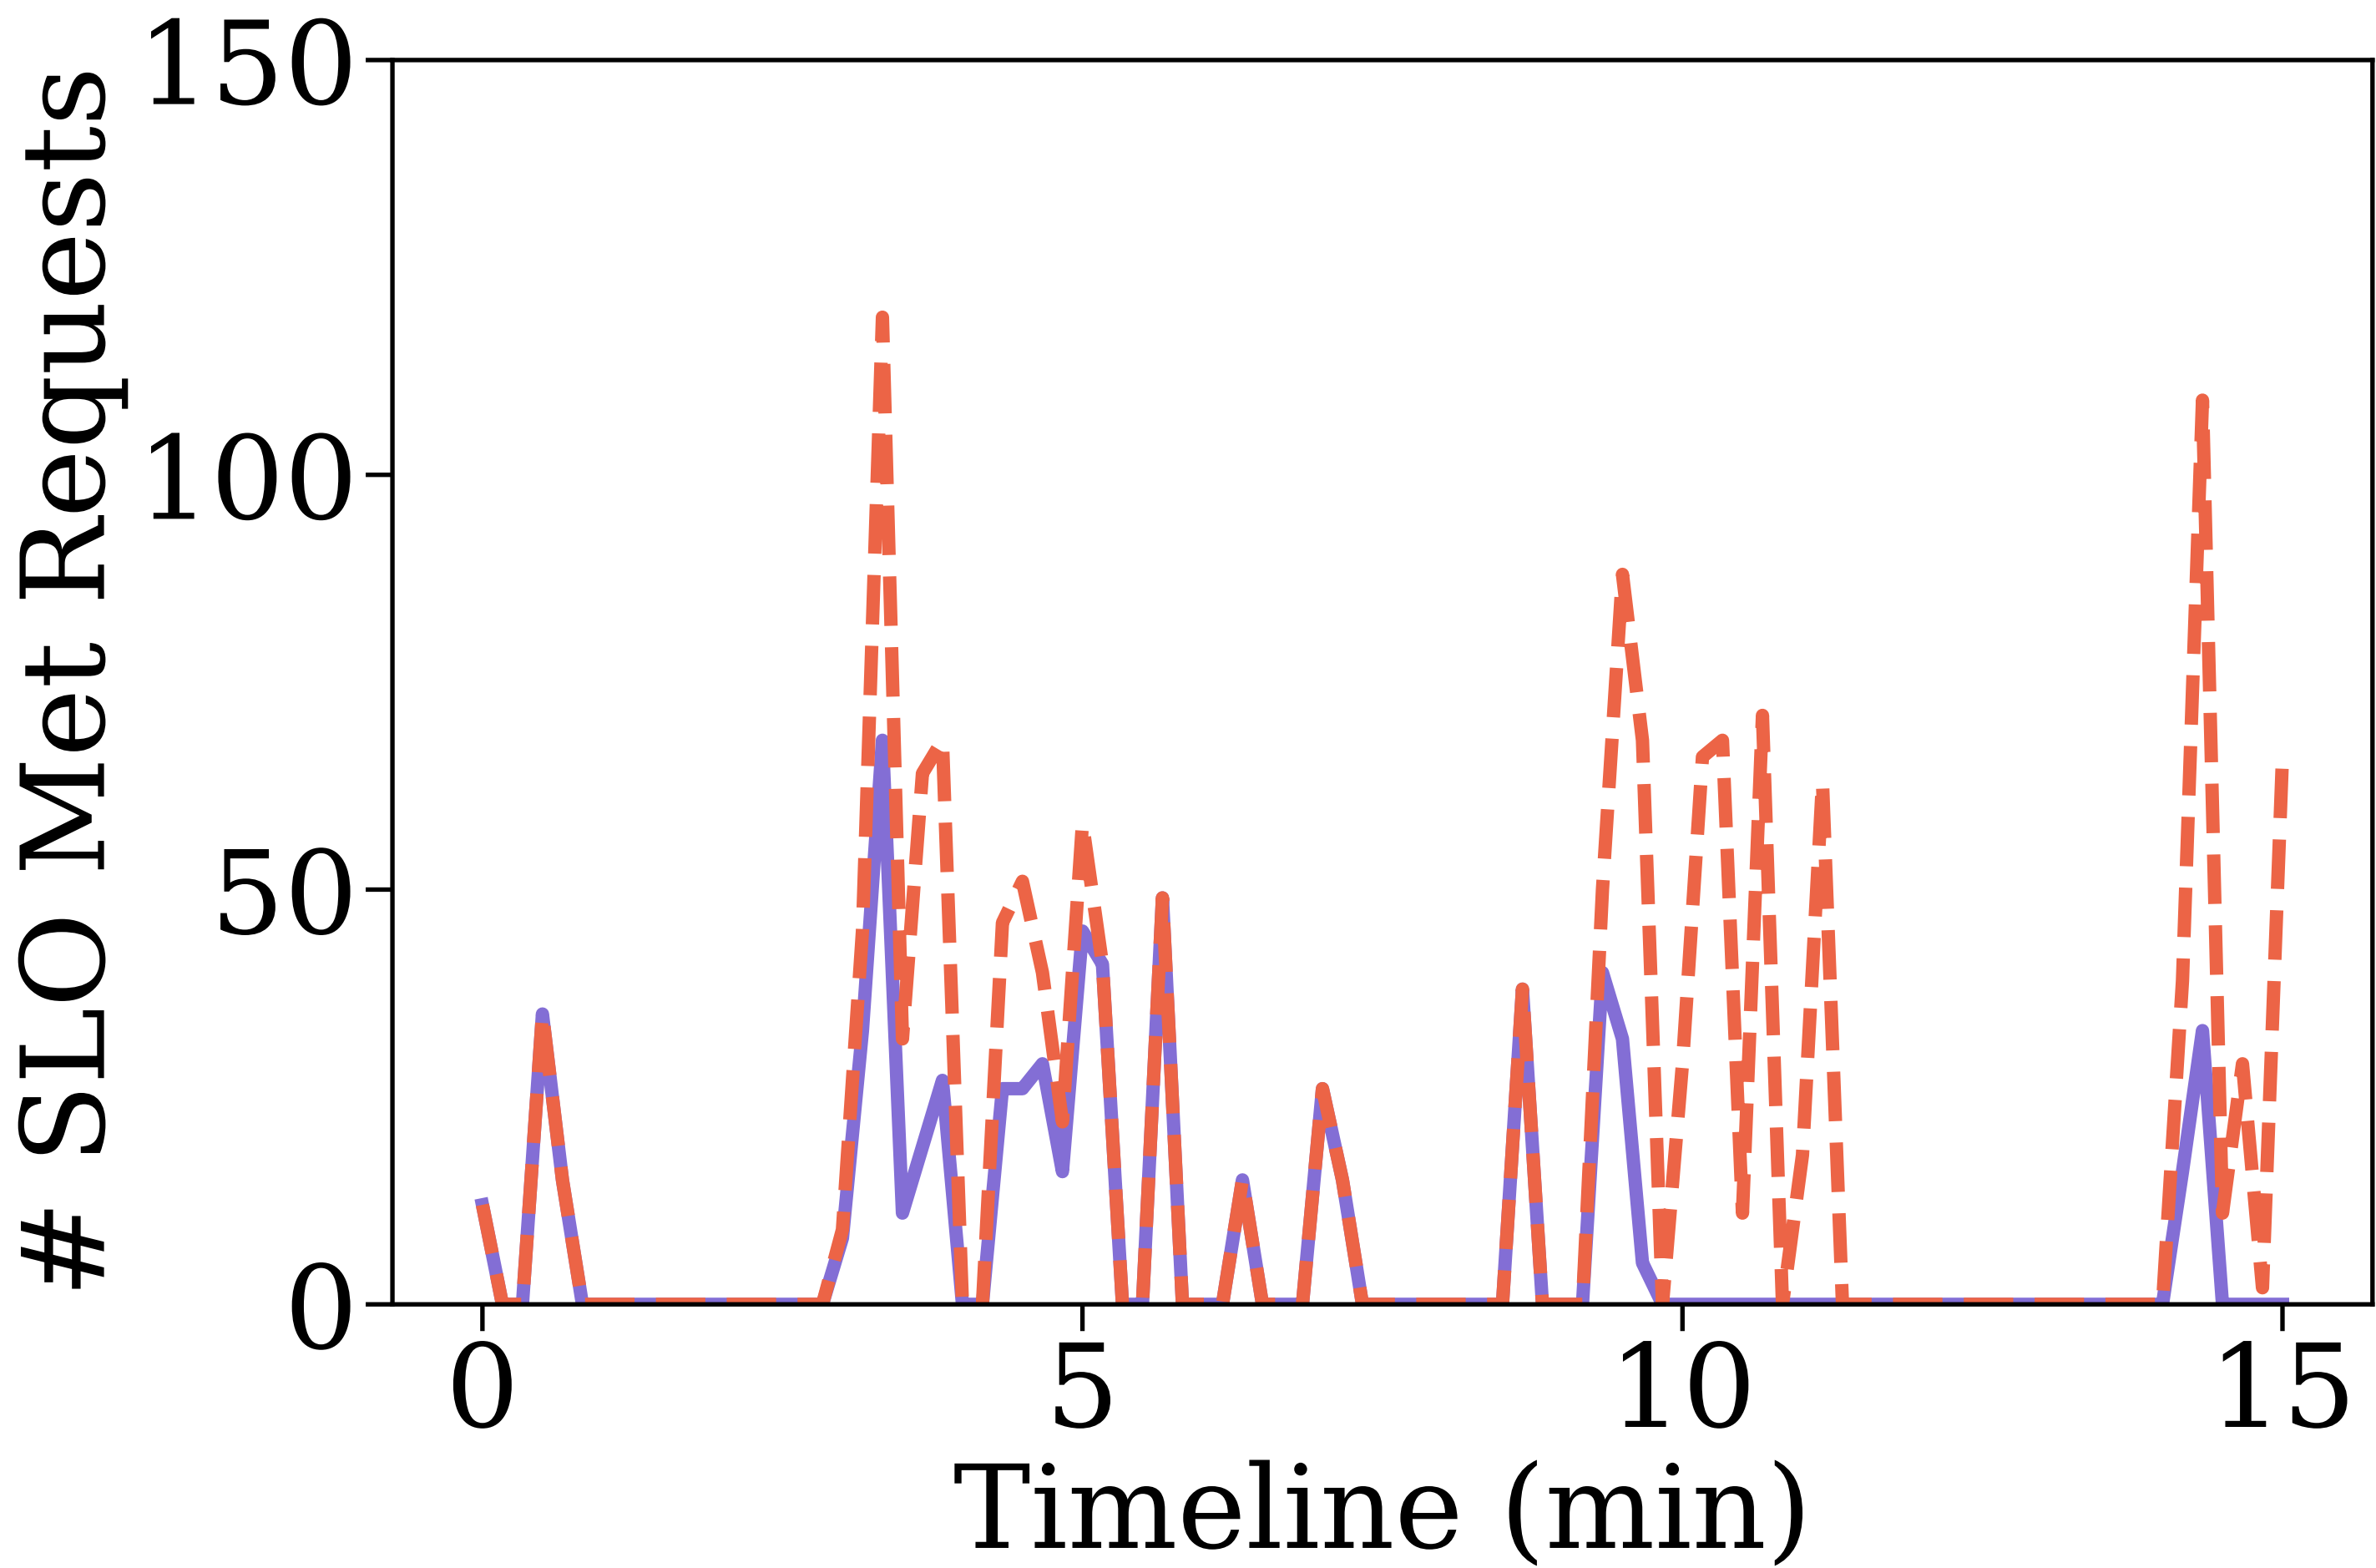

Supplement: supplementary_material [file r1_fcfs_qps_inf.json_slo_met.pdf › scorpio/draw/gemma27b-sharegpt/exp2_trace/r1_fcfs_qps_inf.json_slo_met.pdf]

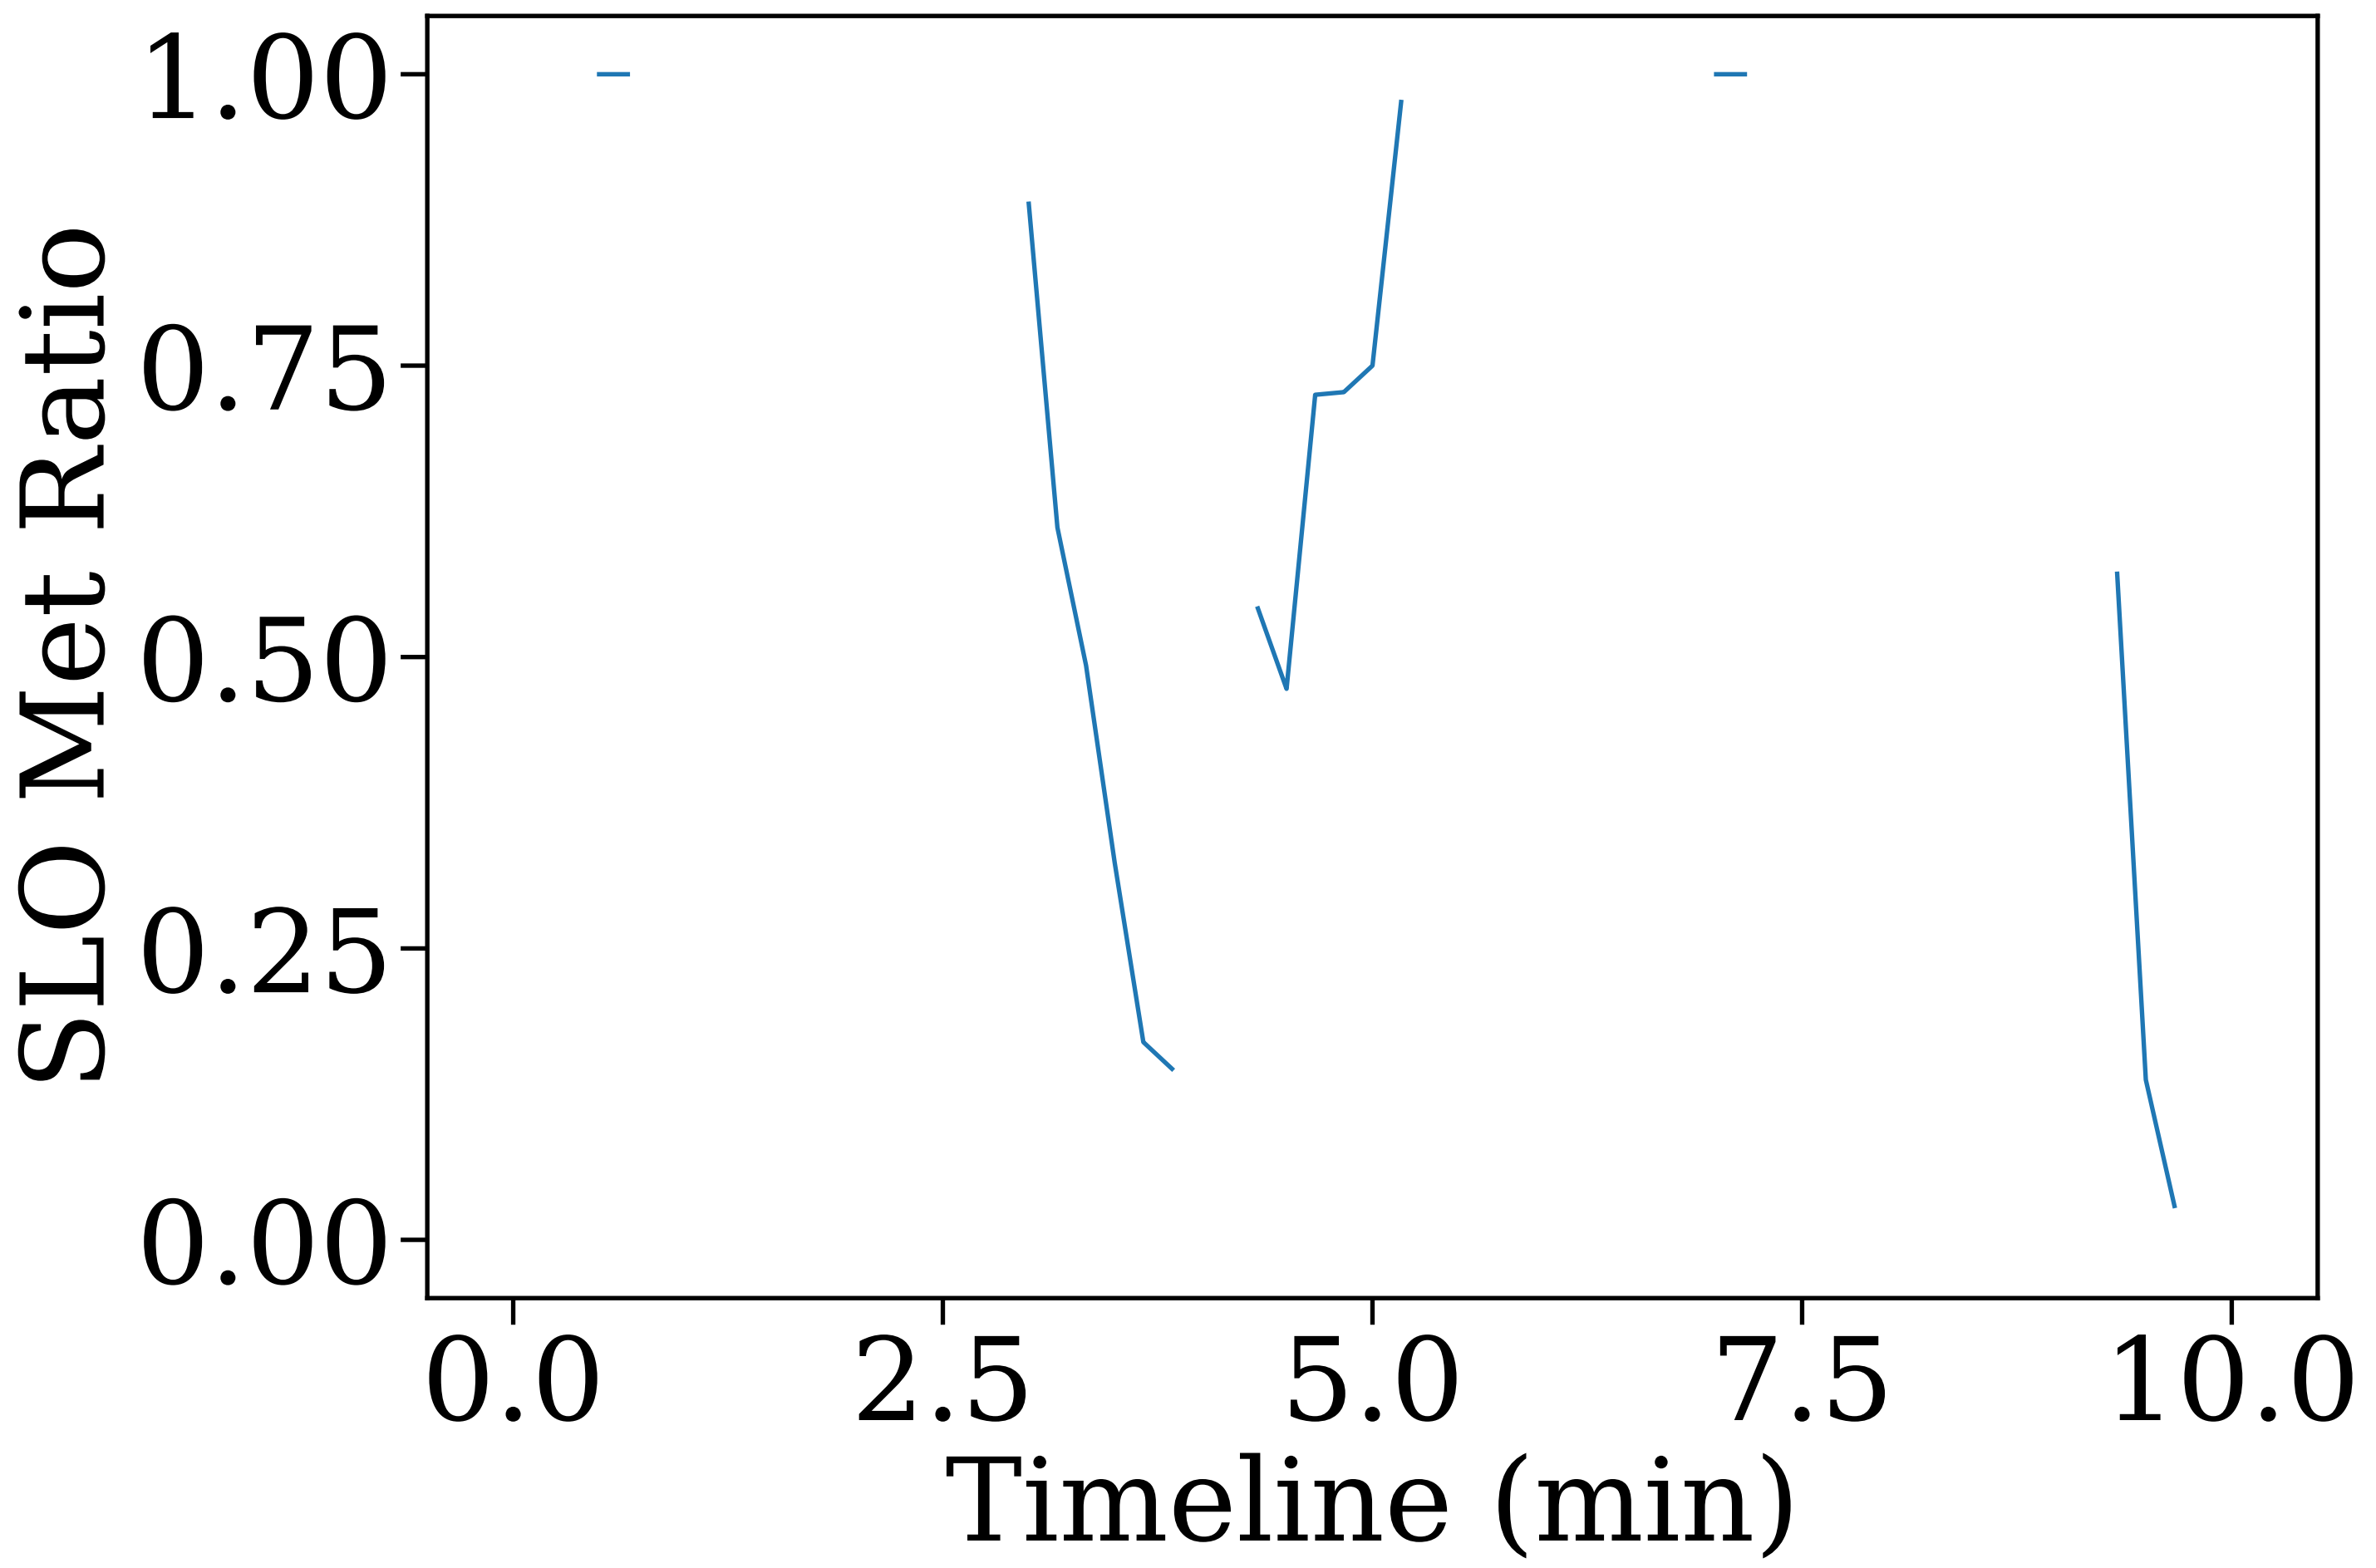

Supplement: supplementary_material [file r1_fcfs_qps_inf.json_slo_met_ratio.pdf › scorpio/draw/gemma27b-sharegpt/exp2_trace/r1_fcfs_qps_inf.json_slo_met_ratio.pdf]

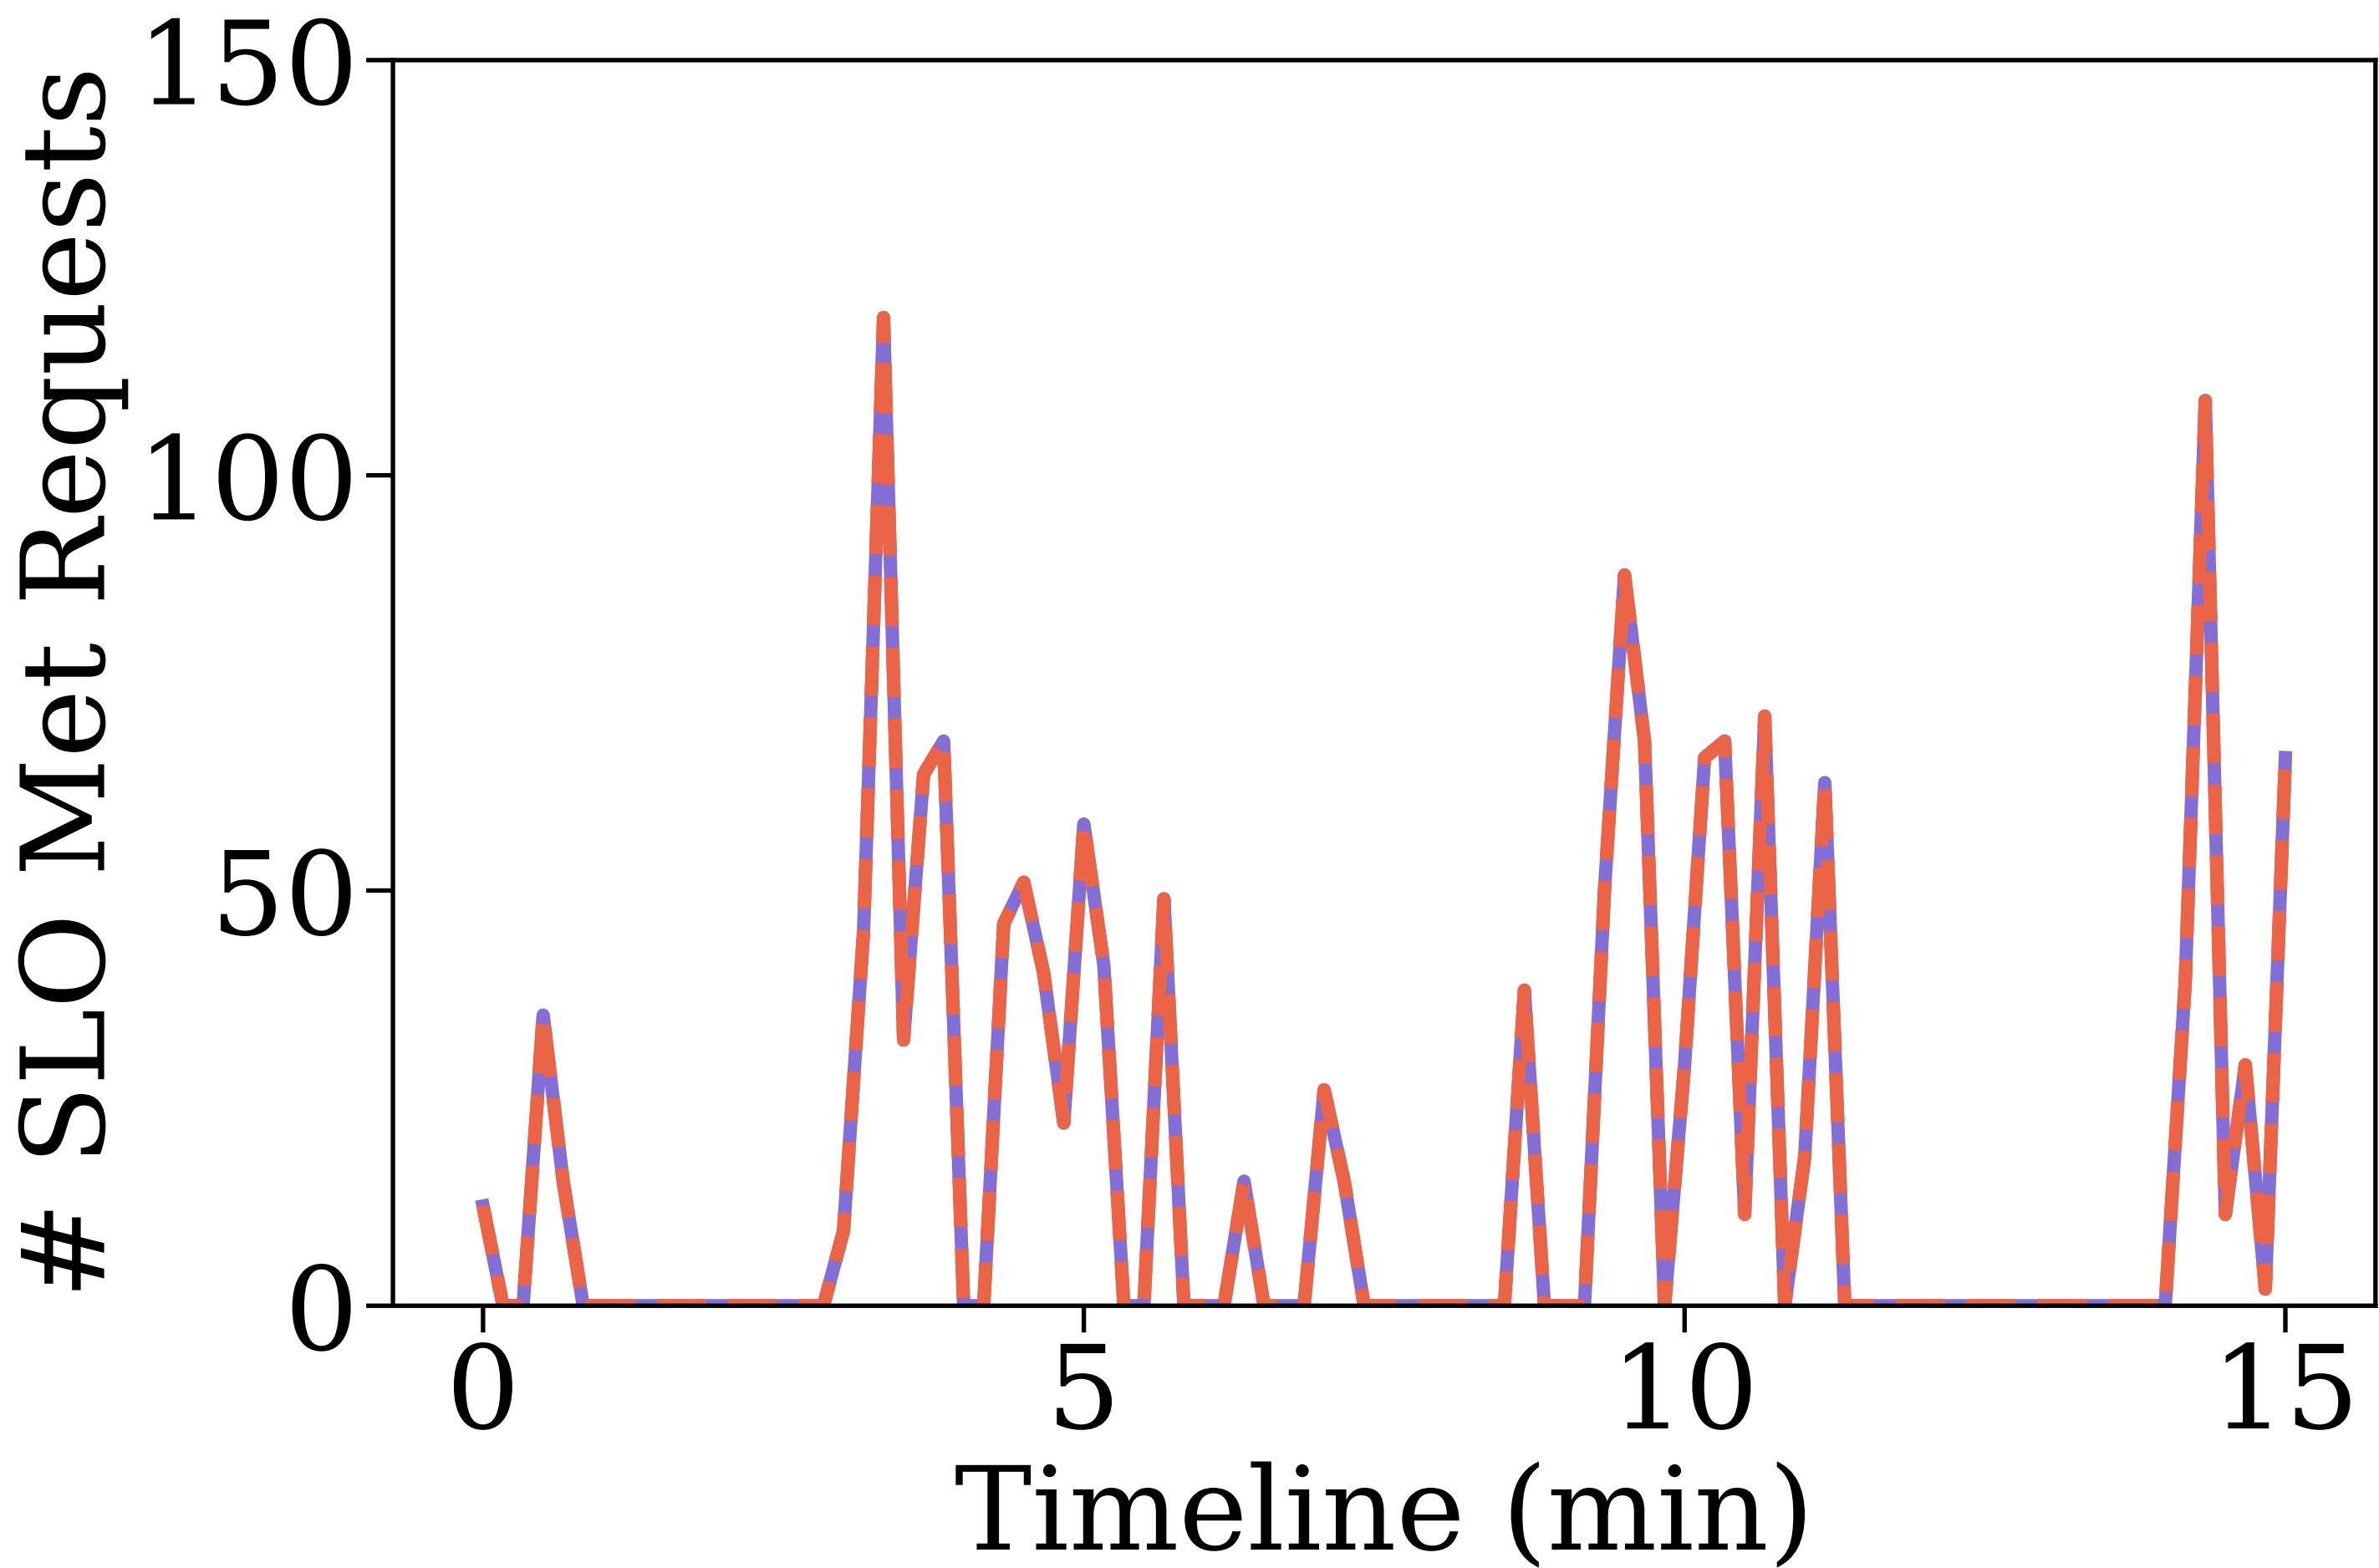

Supplement: supplementary_material [file r1_ldf_rej_gate1.3_credit_qps_inf.json_slo_met.pdf › scorpio/draw/gemma27b-sharegpt/exp2_trace/r1_ldf_rej_gate1.3_credit_qps_inf.json_slo_met.pdf]

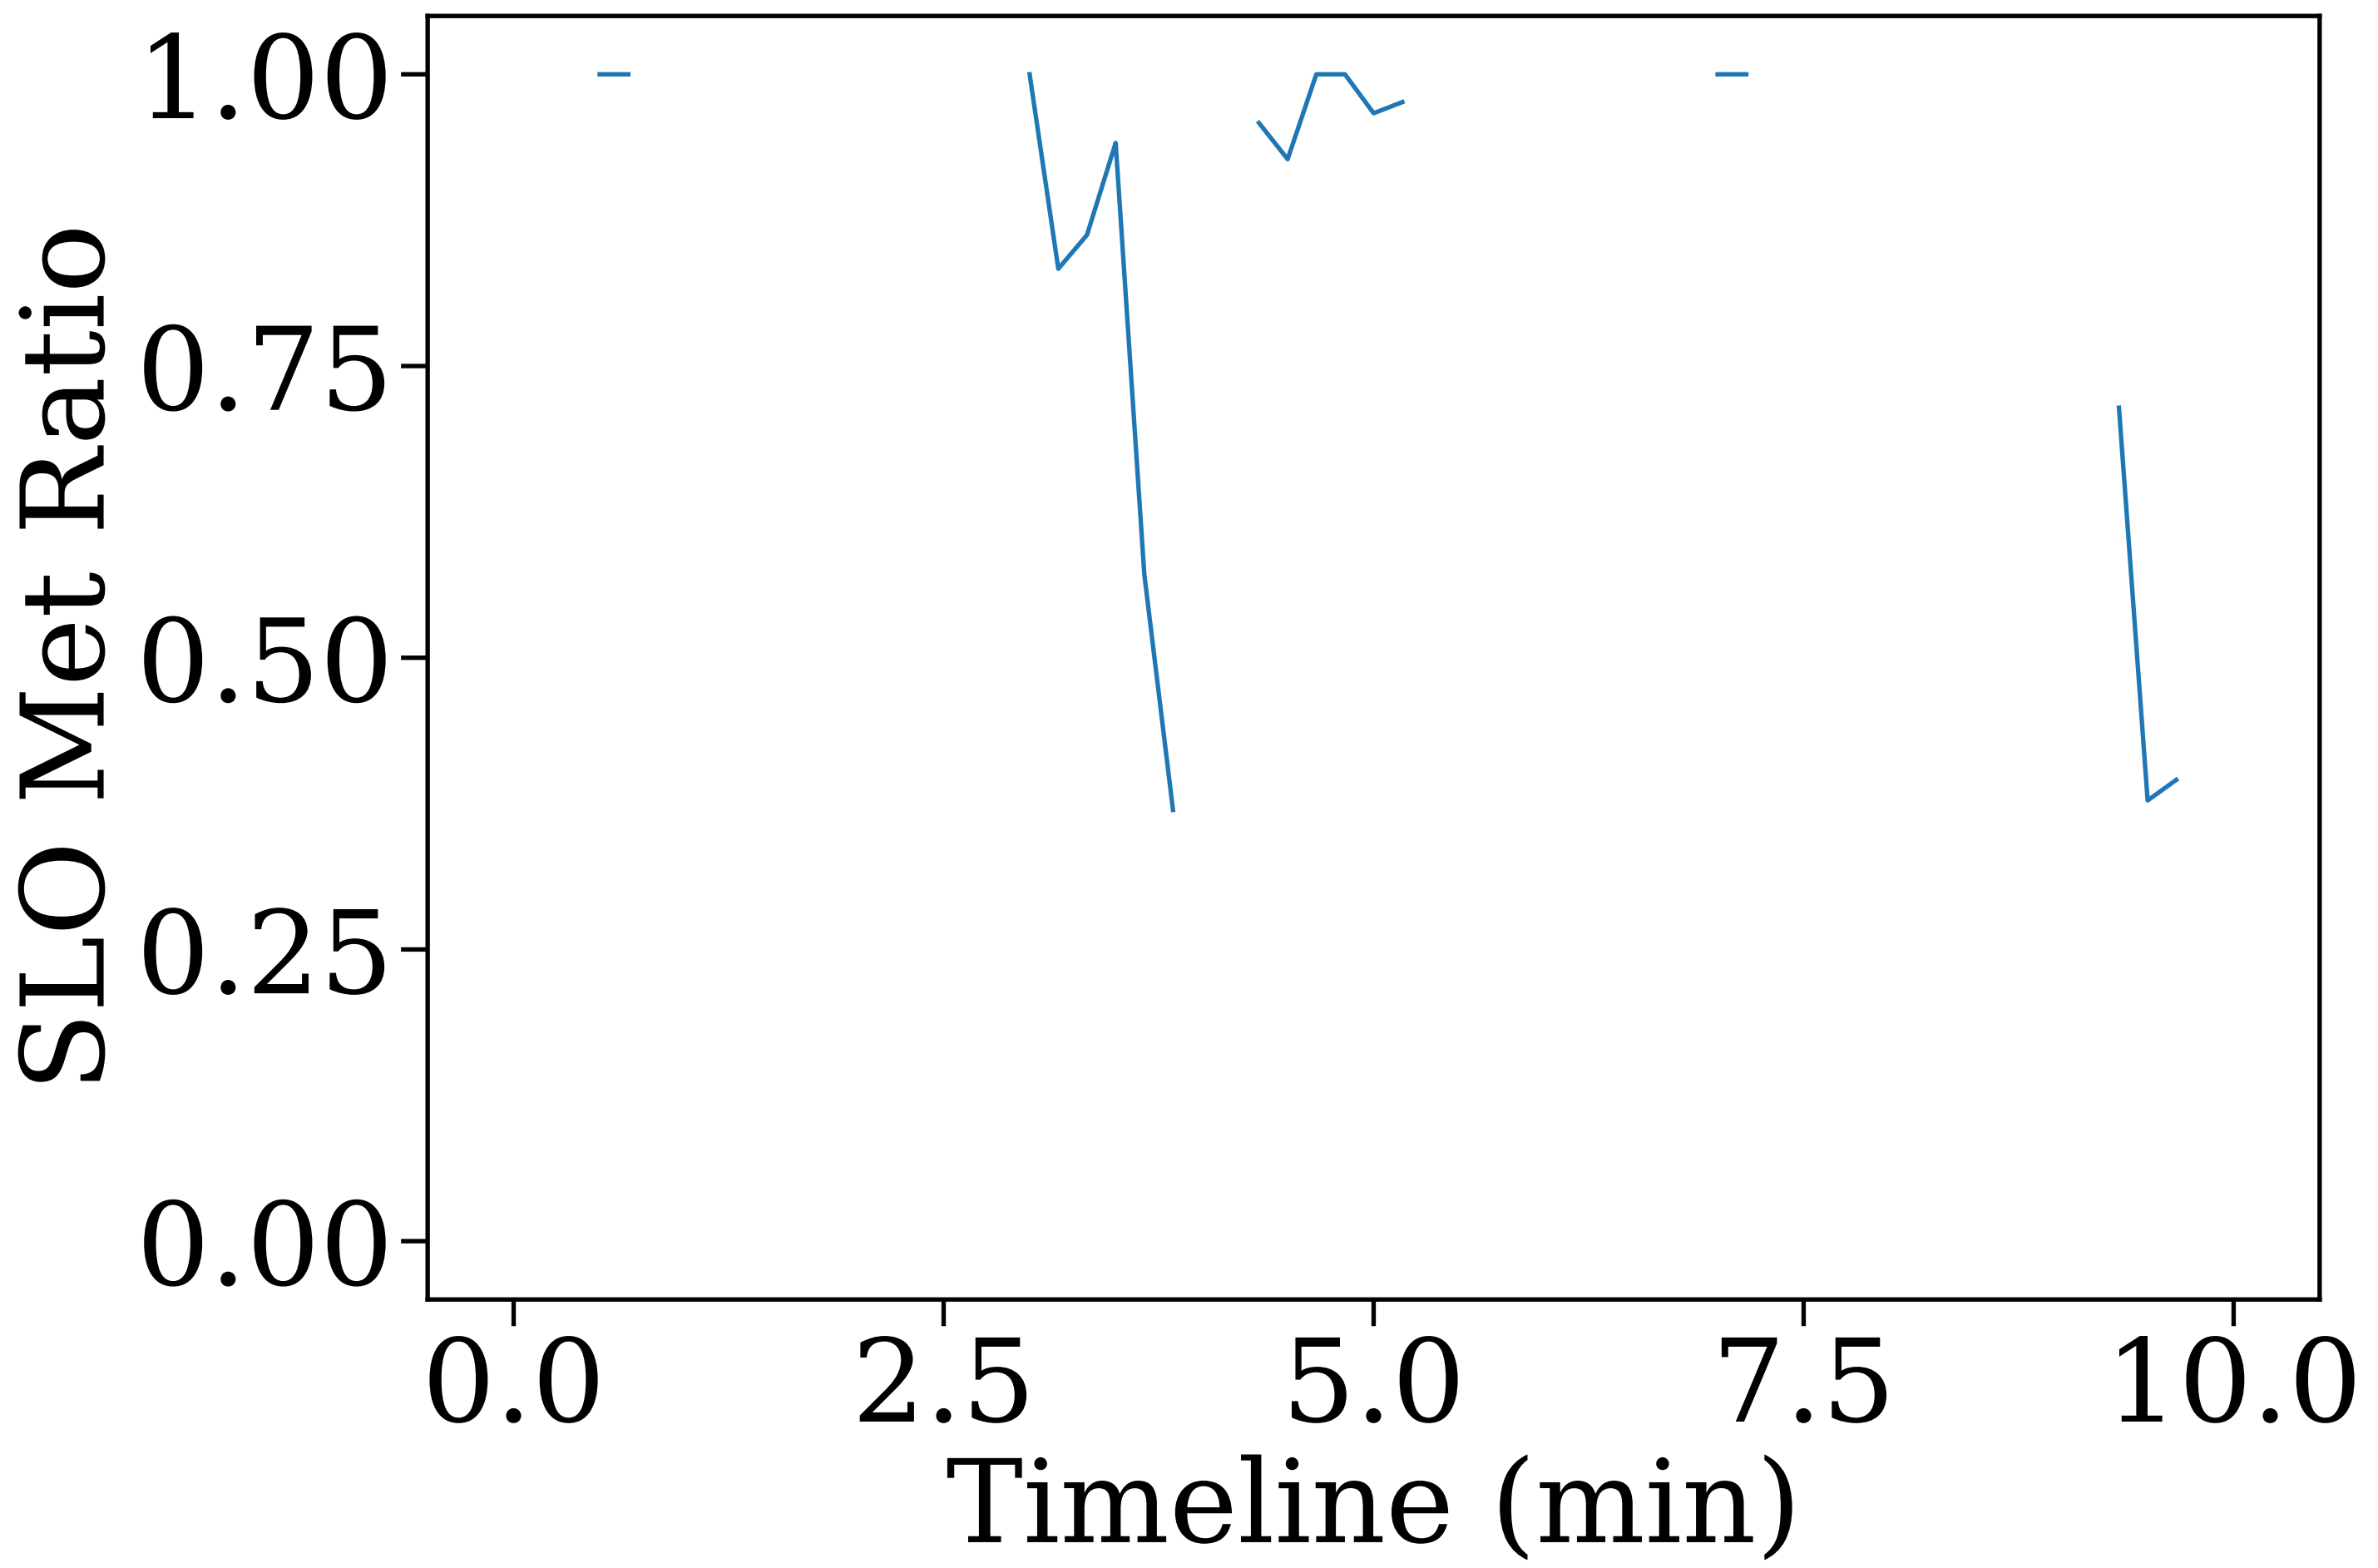

Supplement: supplementary_material [file r1_ldf_rej_gate1.3_credit_qps_inf.json_slo_met_ratio.pdf › scorpio/draw/gemma27b-sharegpt/exp2_trace/r1_ldf_rej_gate1.3_credit_qps_inf.json_slo_met_ratio.pdf]

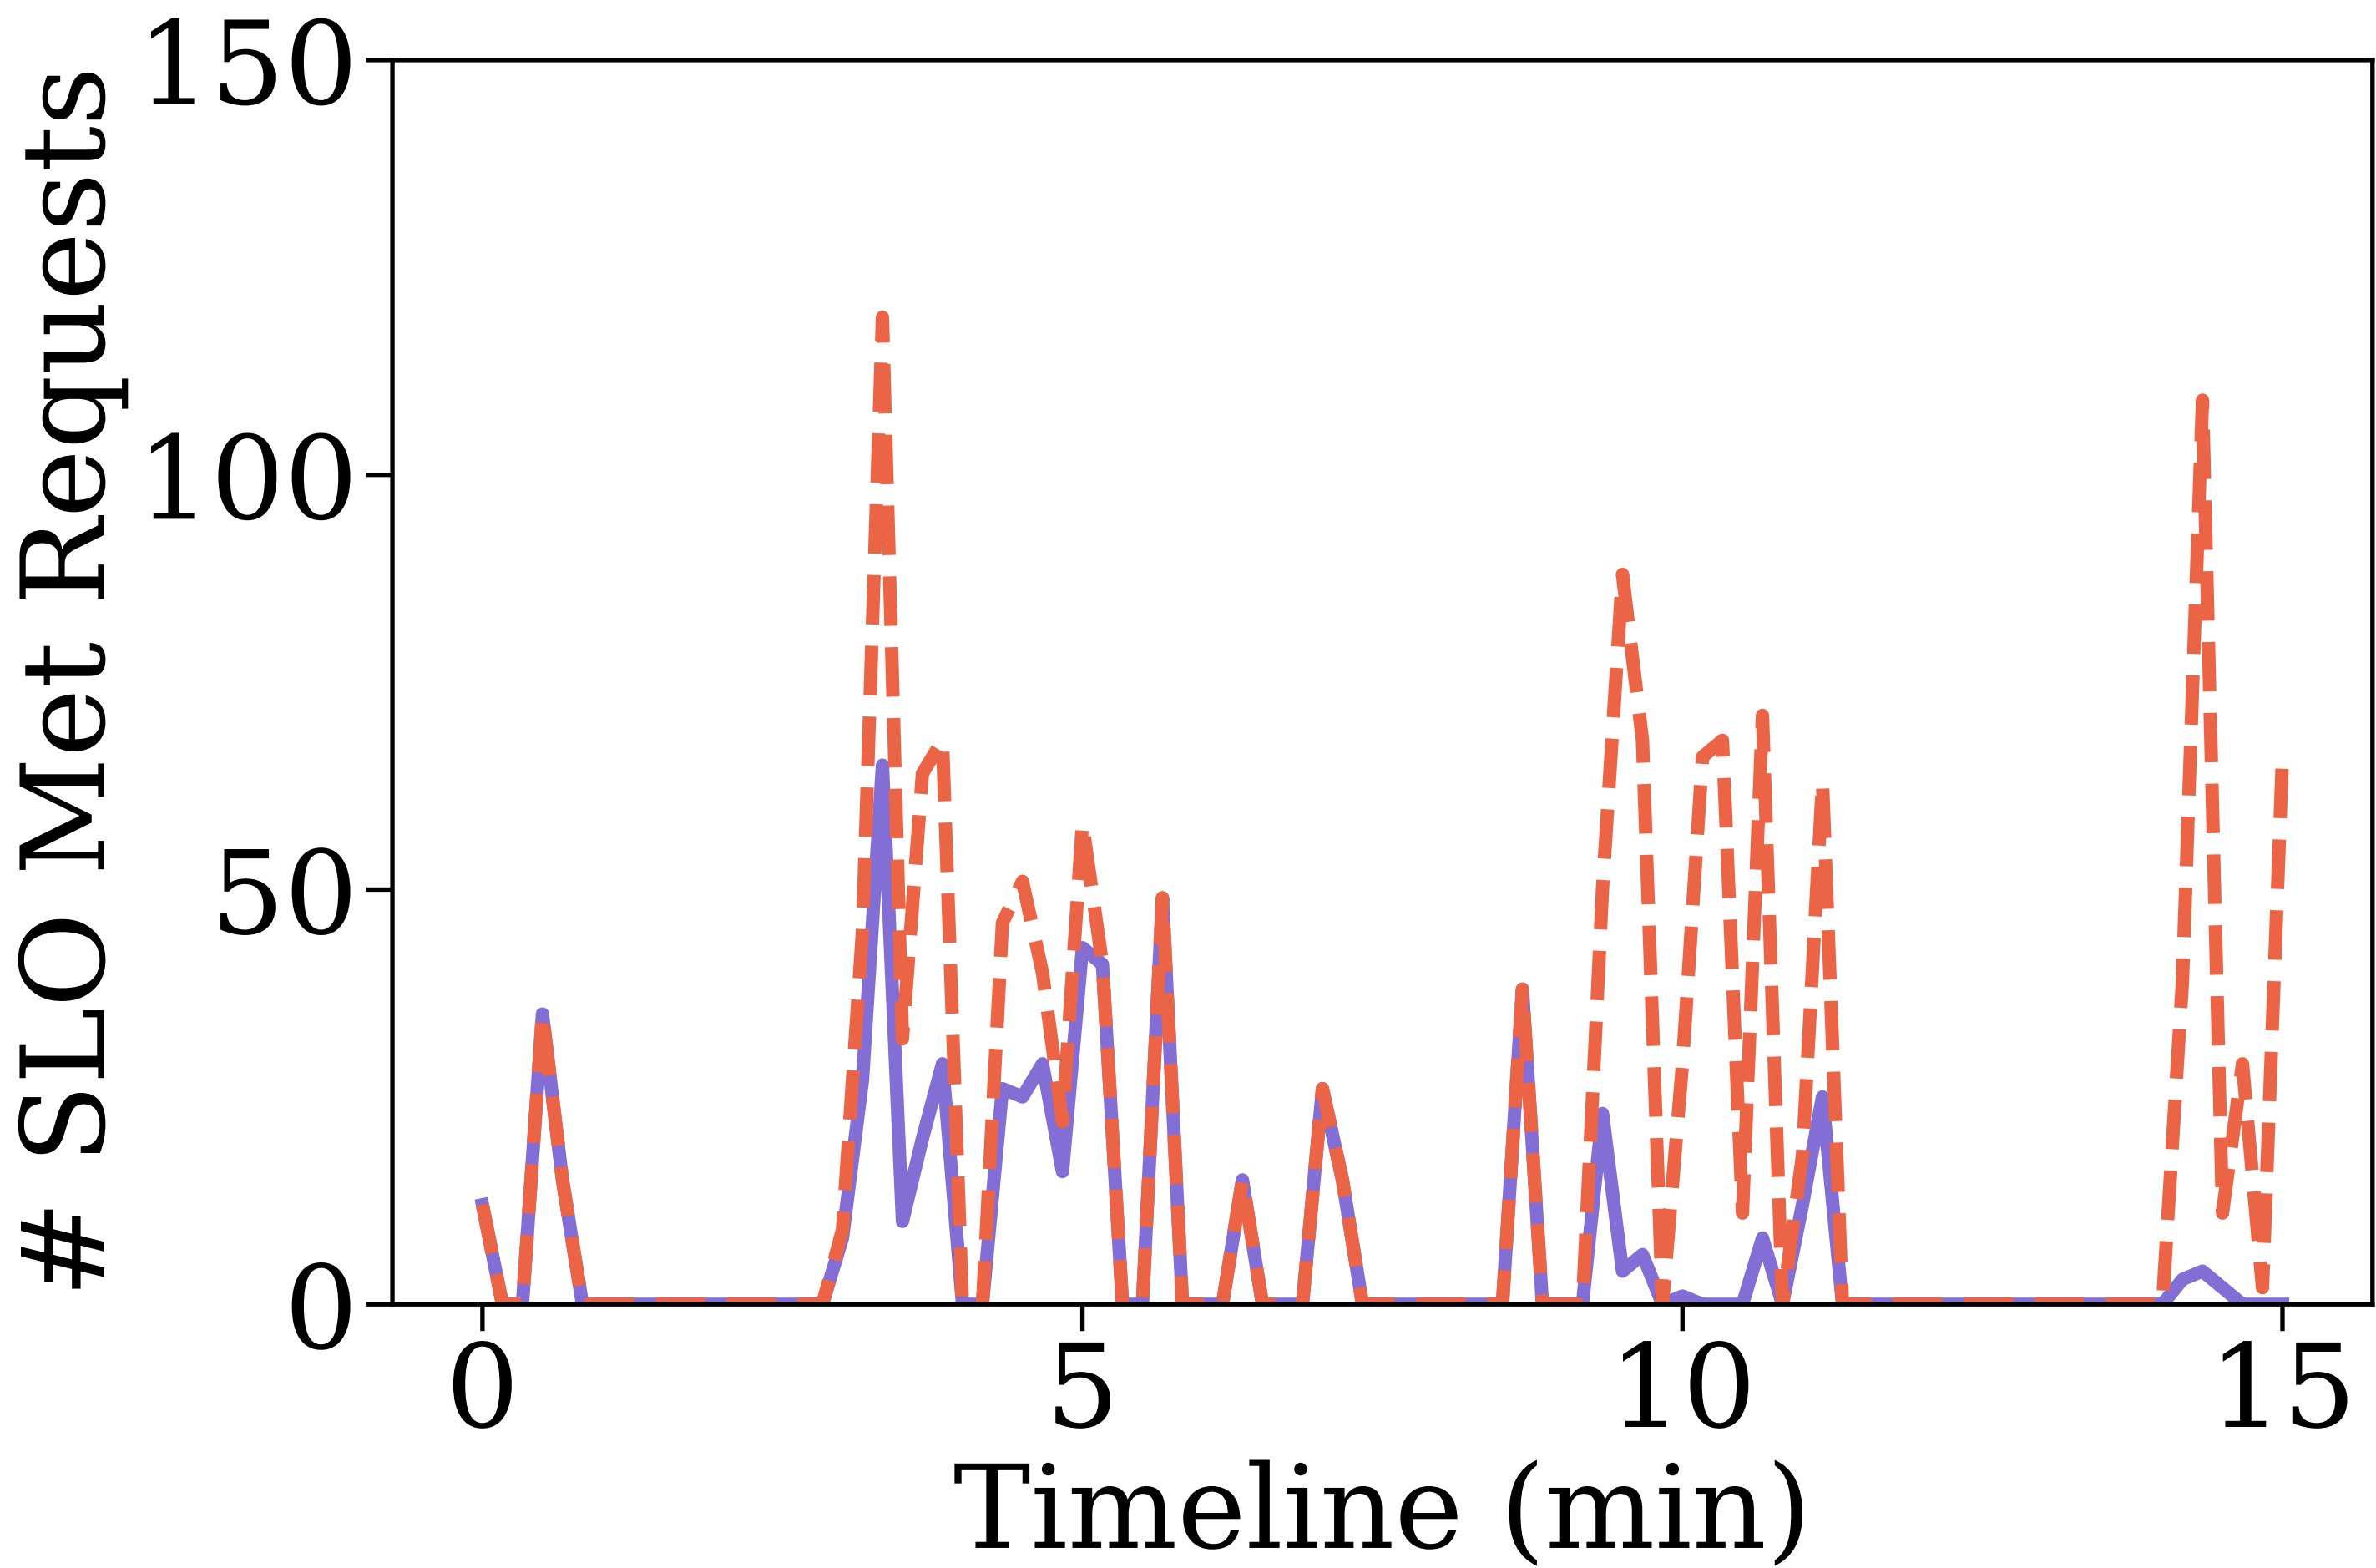

Supplement: supplementary_material [file r1_ssjf_pred_qps_inf.json_slo_met.pdf › scorpio/draw/gemma27b-sharegpt/exp2_trace/r1_ssjf_pred_qps_inf.json_slo_met.pdf]

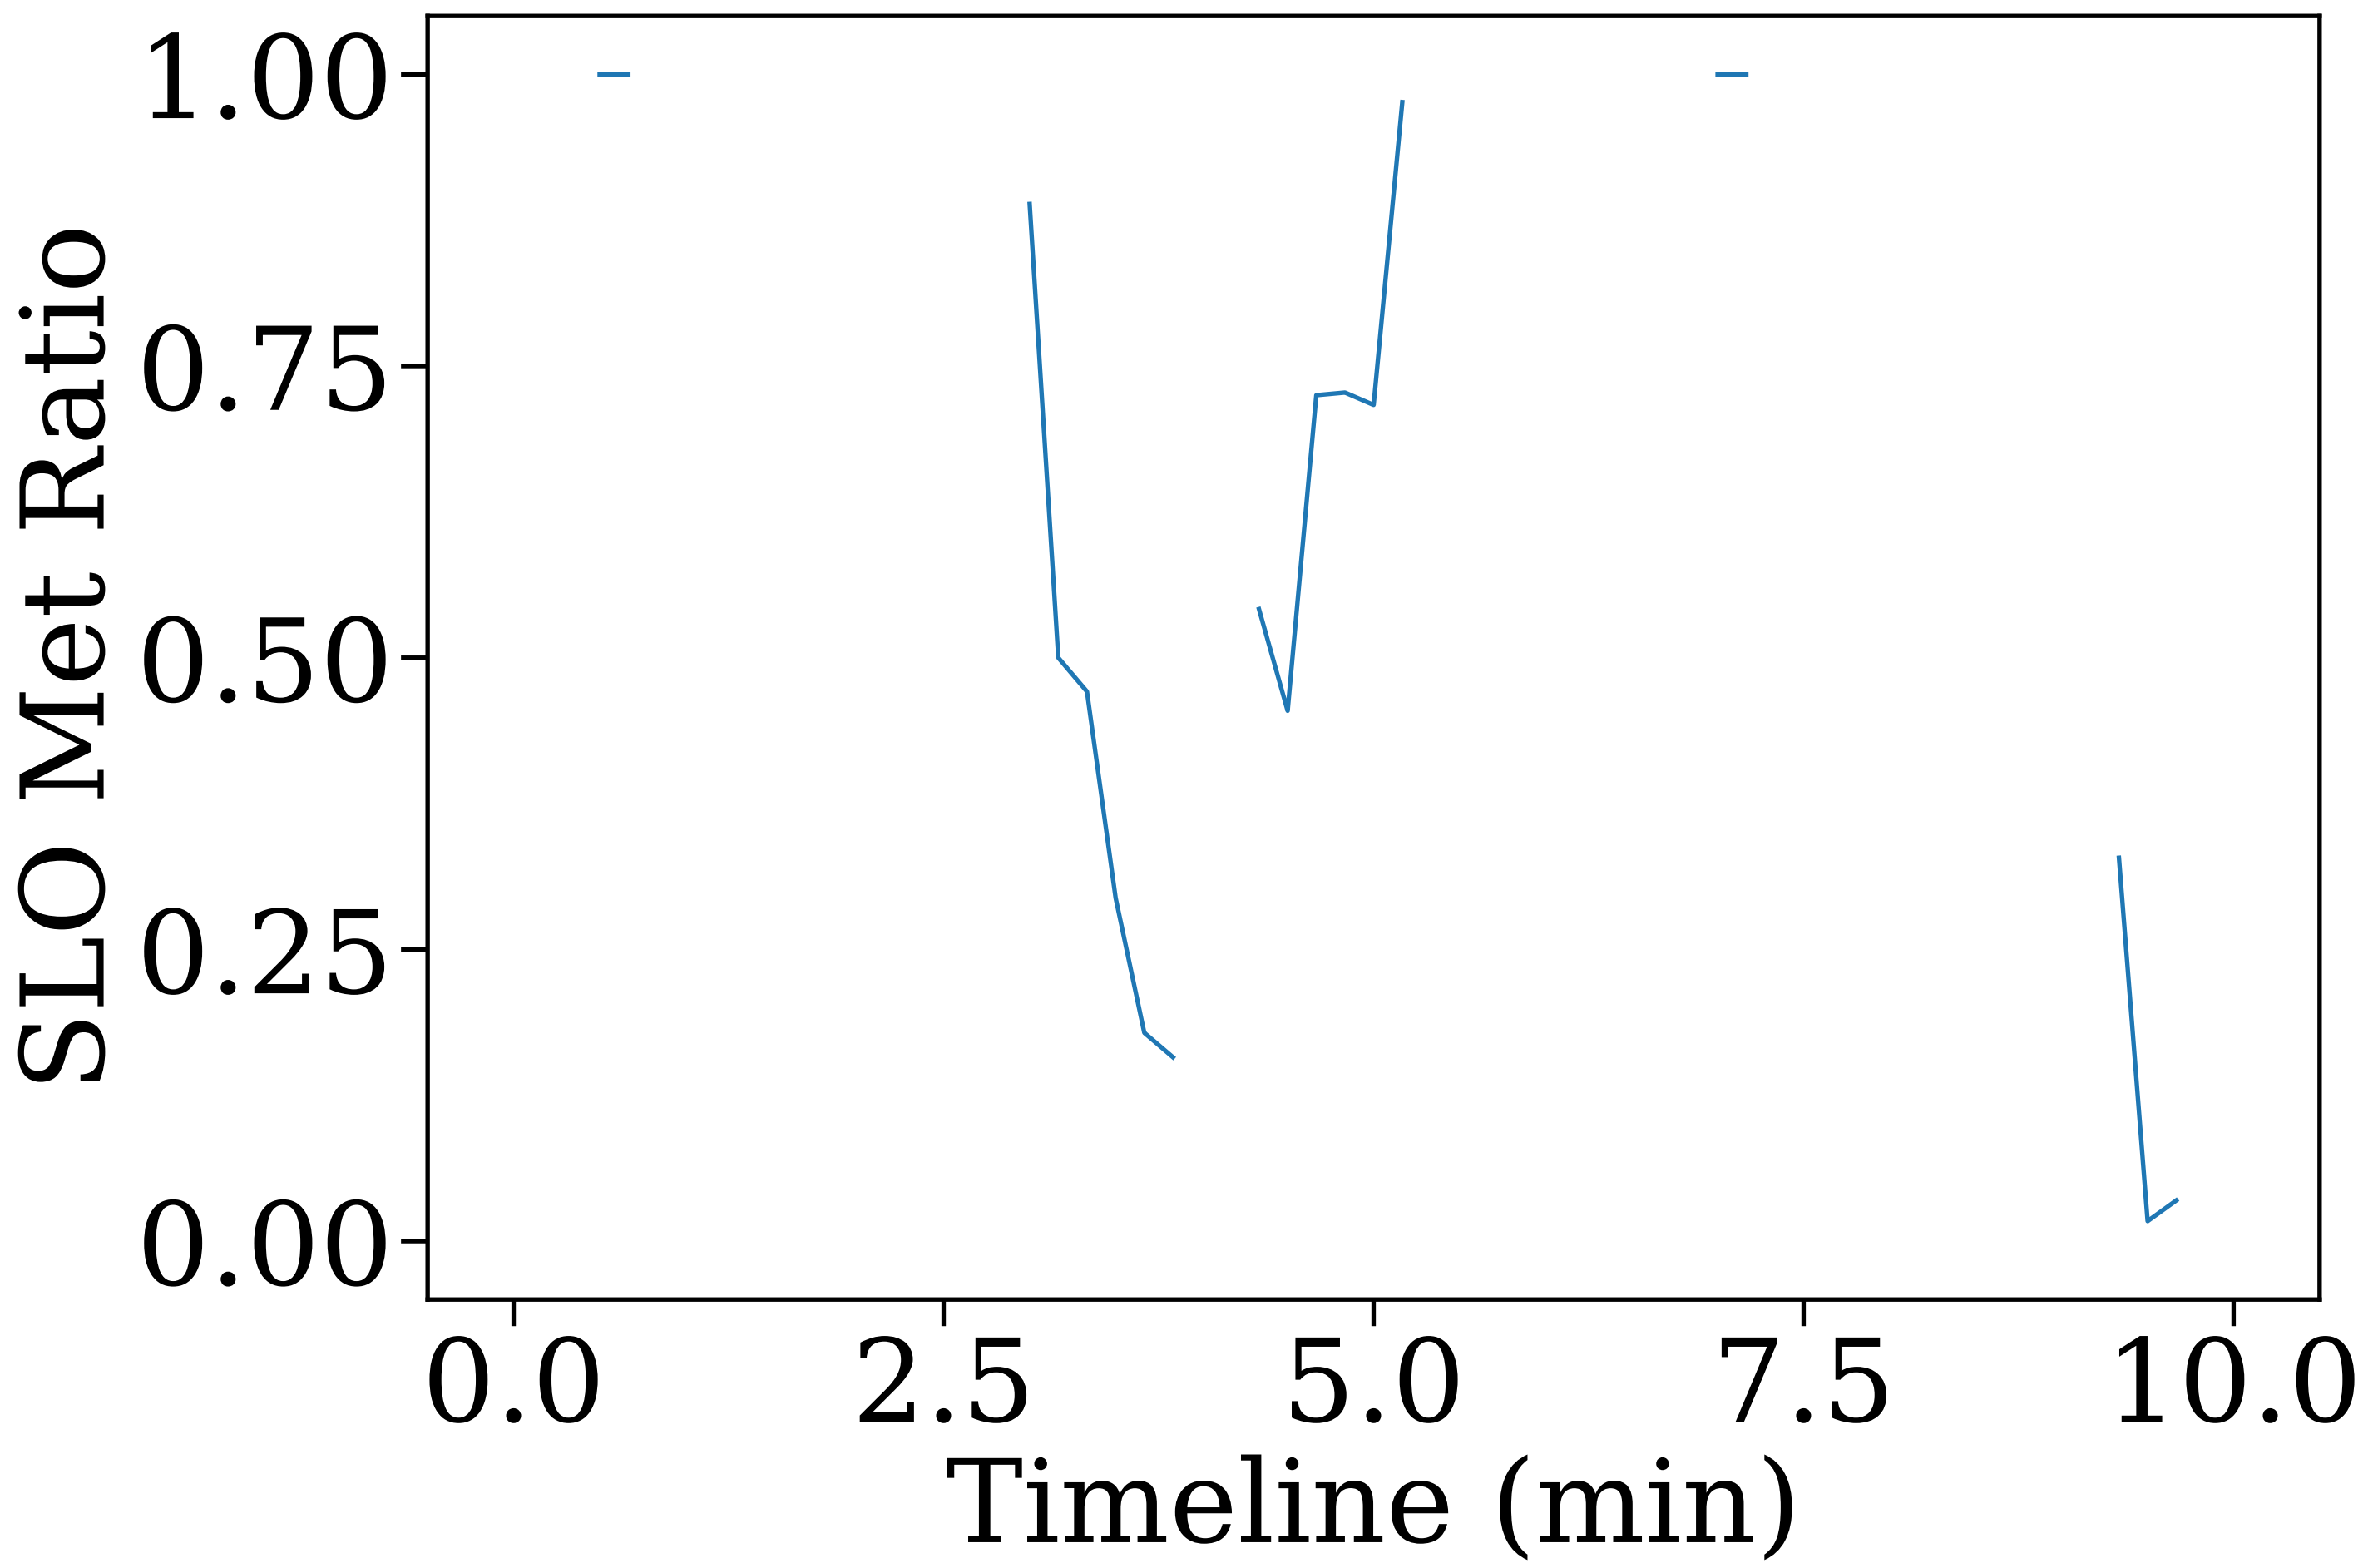

Supplement: supplementary_material [file r1_ssjf_pred_qps_inf.json_slo_met_ratio.pdf › scorpio/draw/gemma27b-sharegpt/exp2_trace/r1_ssjf_pred_qps_inf.json_slo_met_ratio.pdf]

 Scorpio(Ours)     vLLM     Mooncake     S3

Supplement: supplementary_material [file slo_goodput_legend.pdf › scorpio/draw/gemma27b-sharegpt/exp2_trace/slo_goodput_legend.pdf]

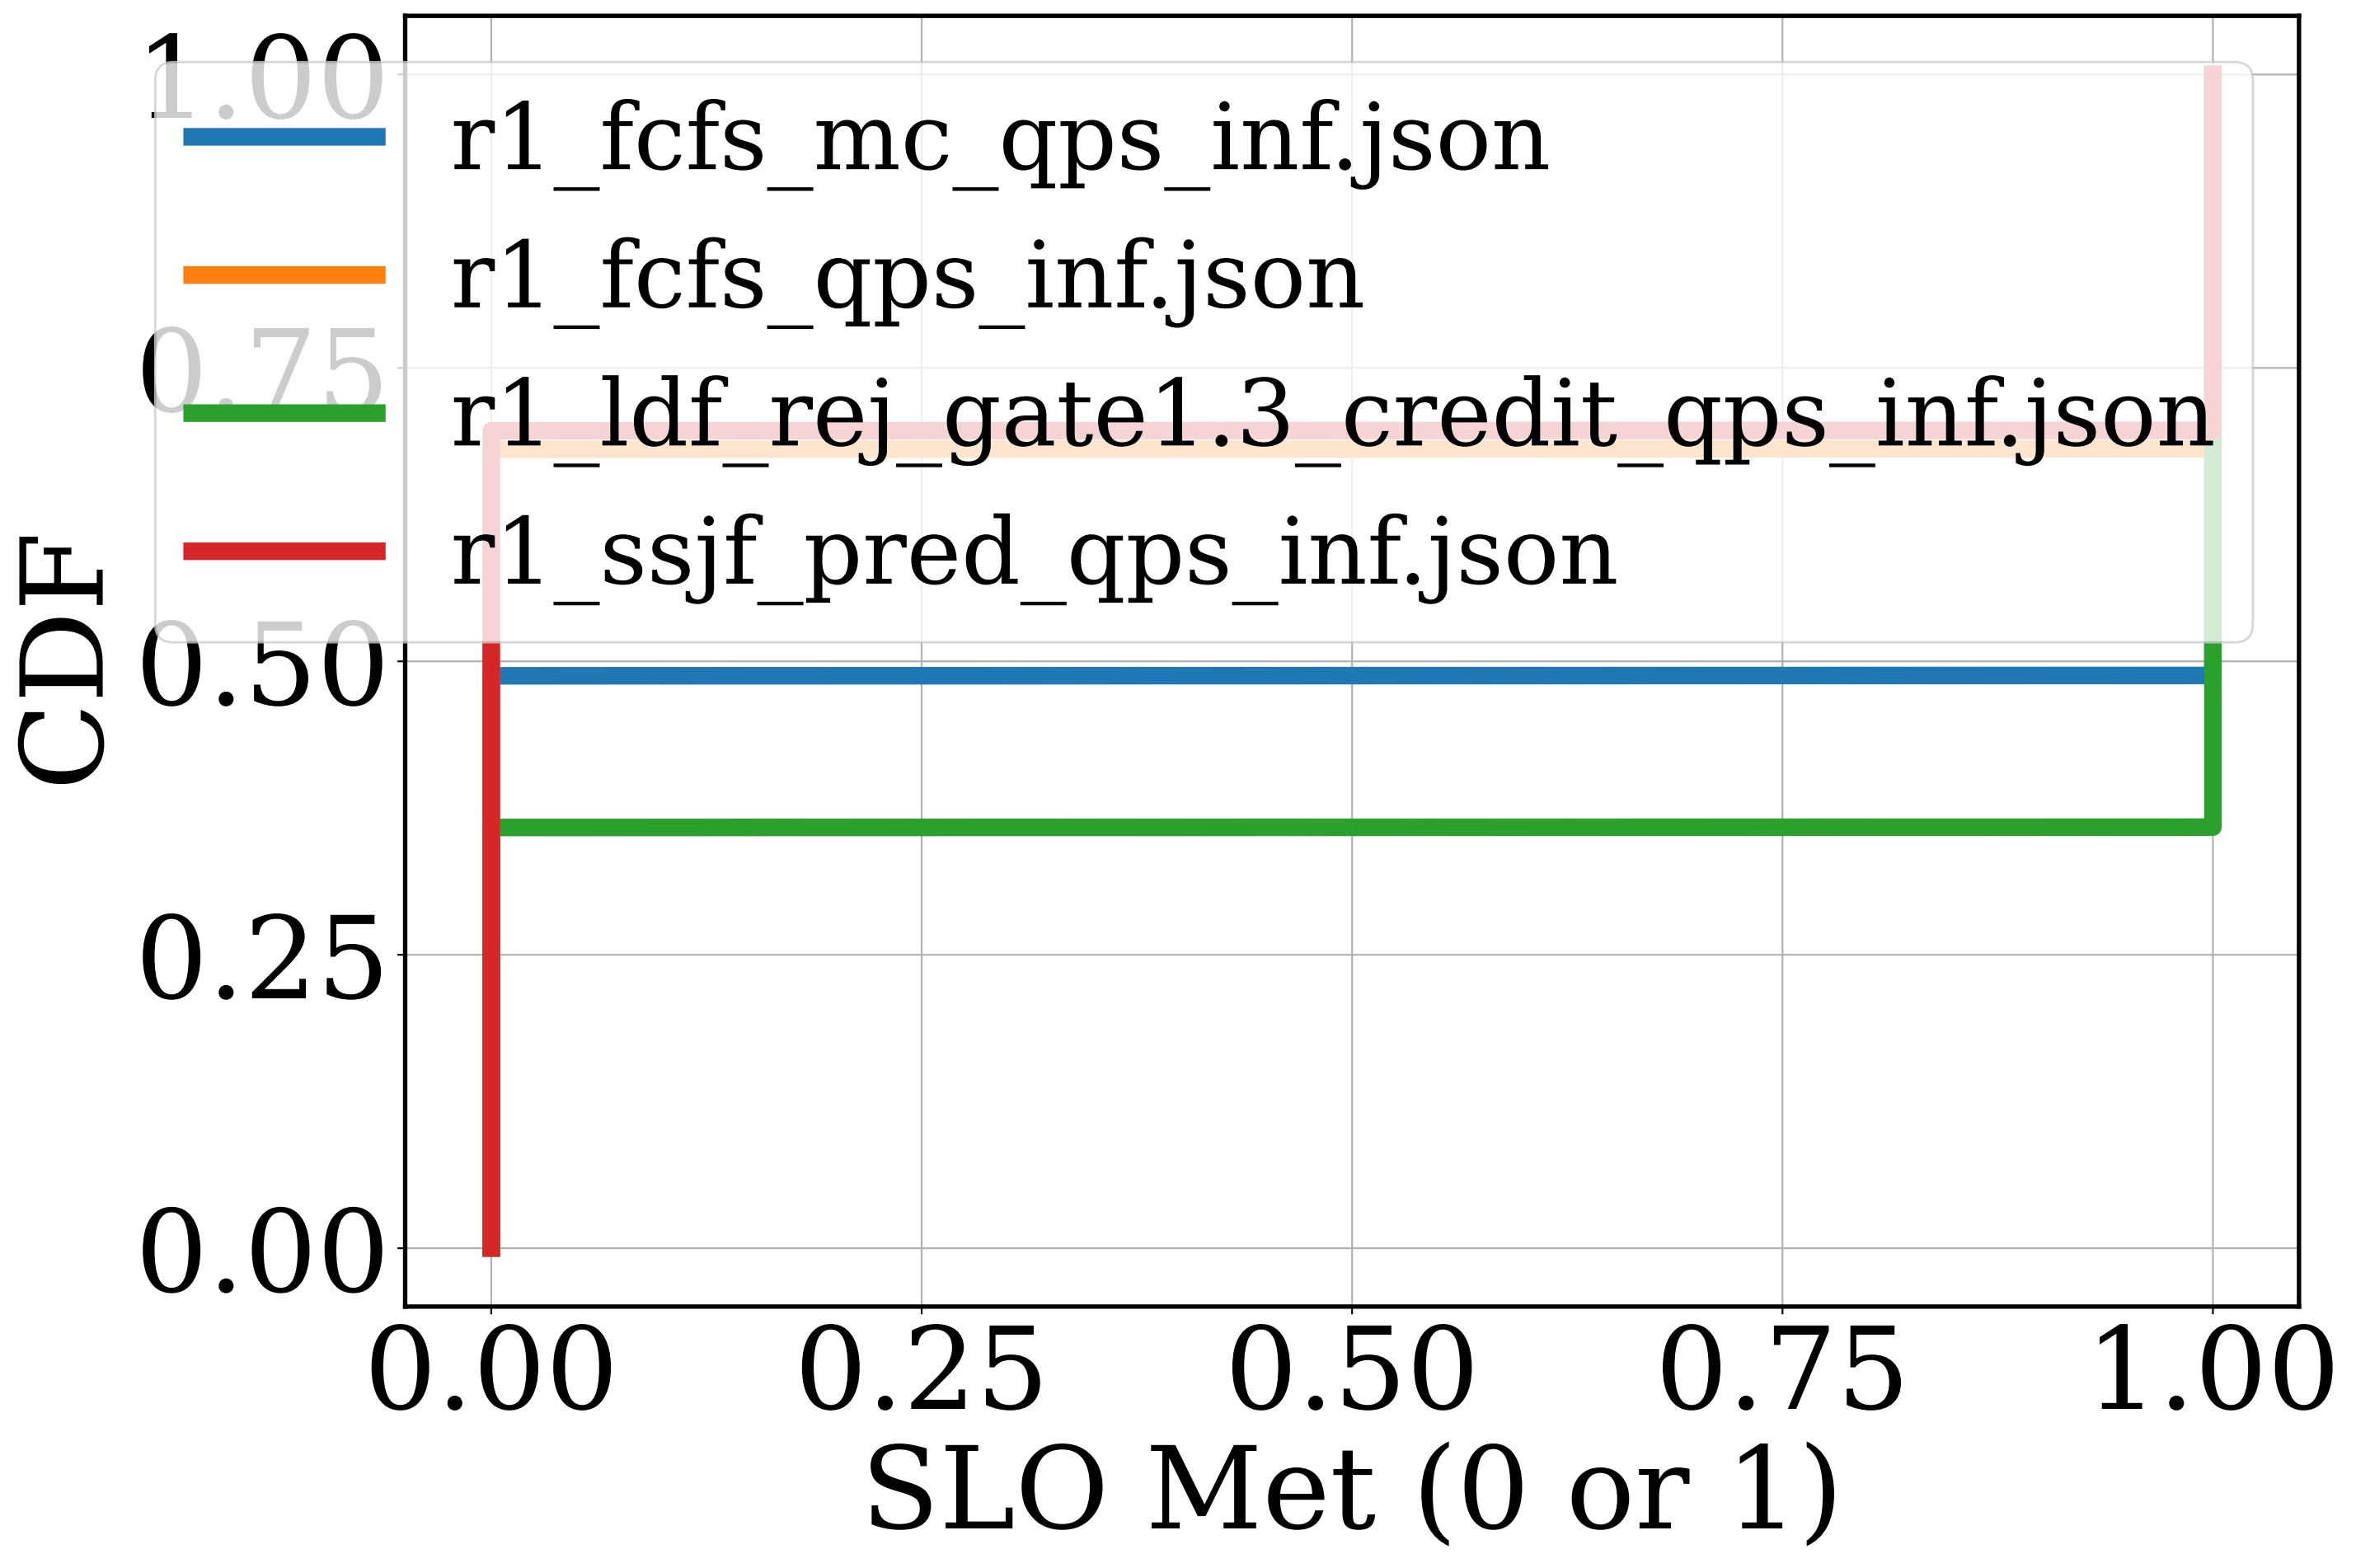

Supplement: supplementary_material [file slo_met_cdf.pdf › scorpio/draw/gemma27b-sharegpt/exp2_trace/slo_met_cdf.pdf]

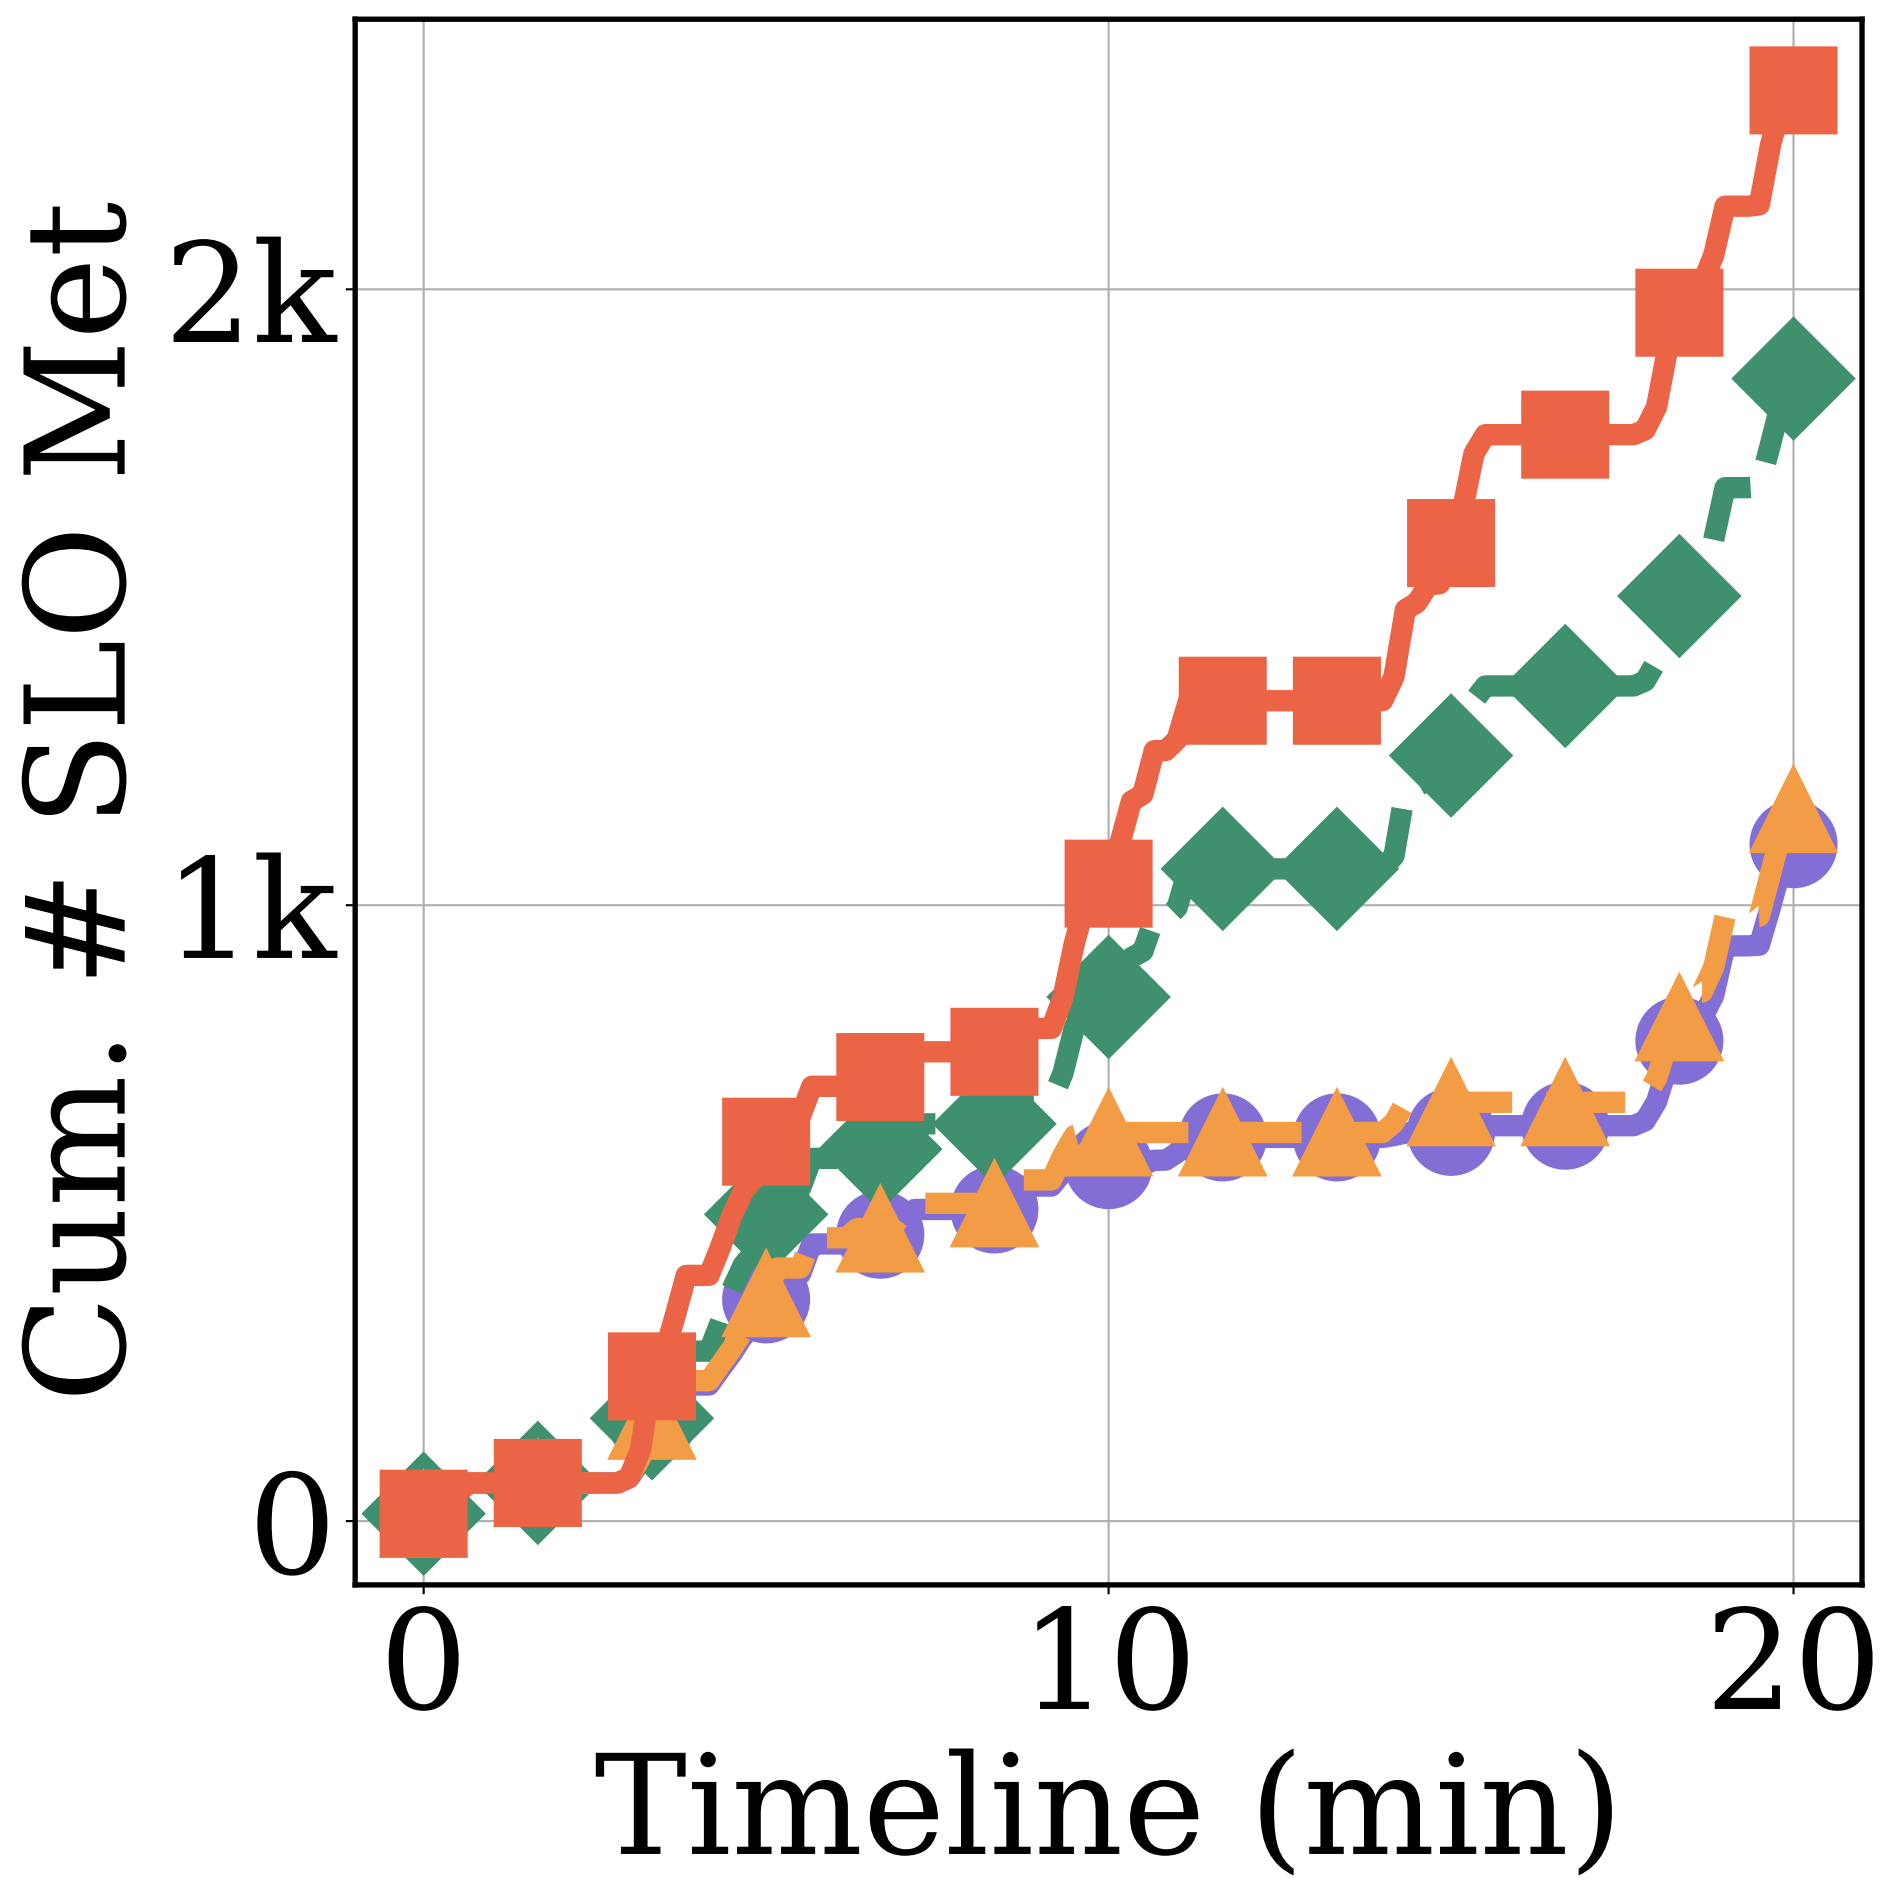

Supplement: supplementary_material [file slo_met_over_time_cdf.pdf › scorpio/draw/gemma27b-sharegpt/exp2_trace/slo_met_over_time_cdf.pdf]

# of Violation

300  
200  
100  
0

vLLM

+TPOT

+TTFT

Scorpio

Guard

Guard

2

1

Goodput

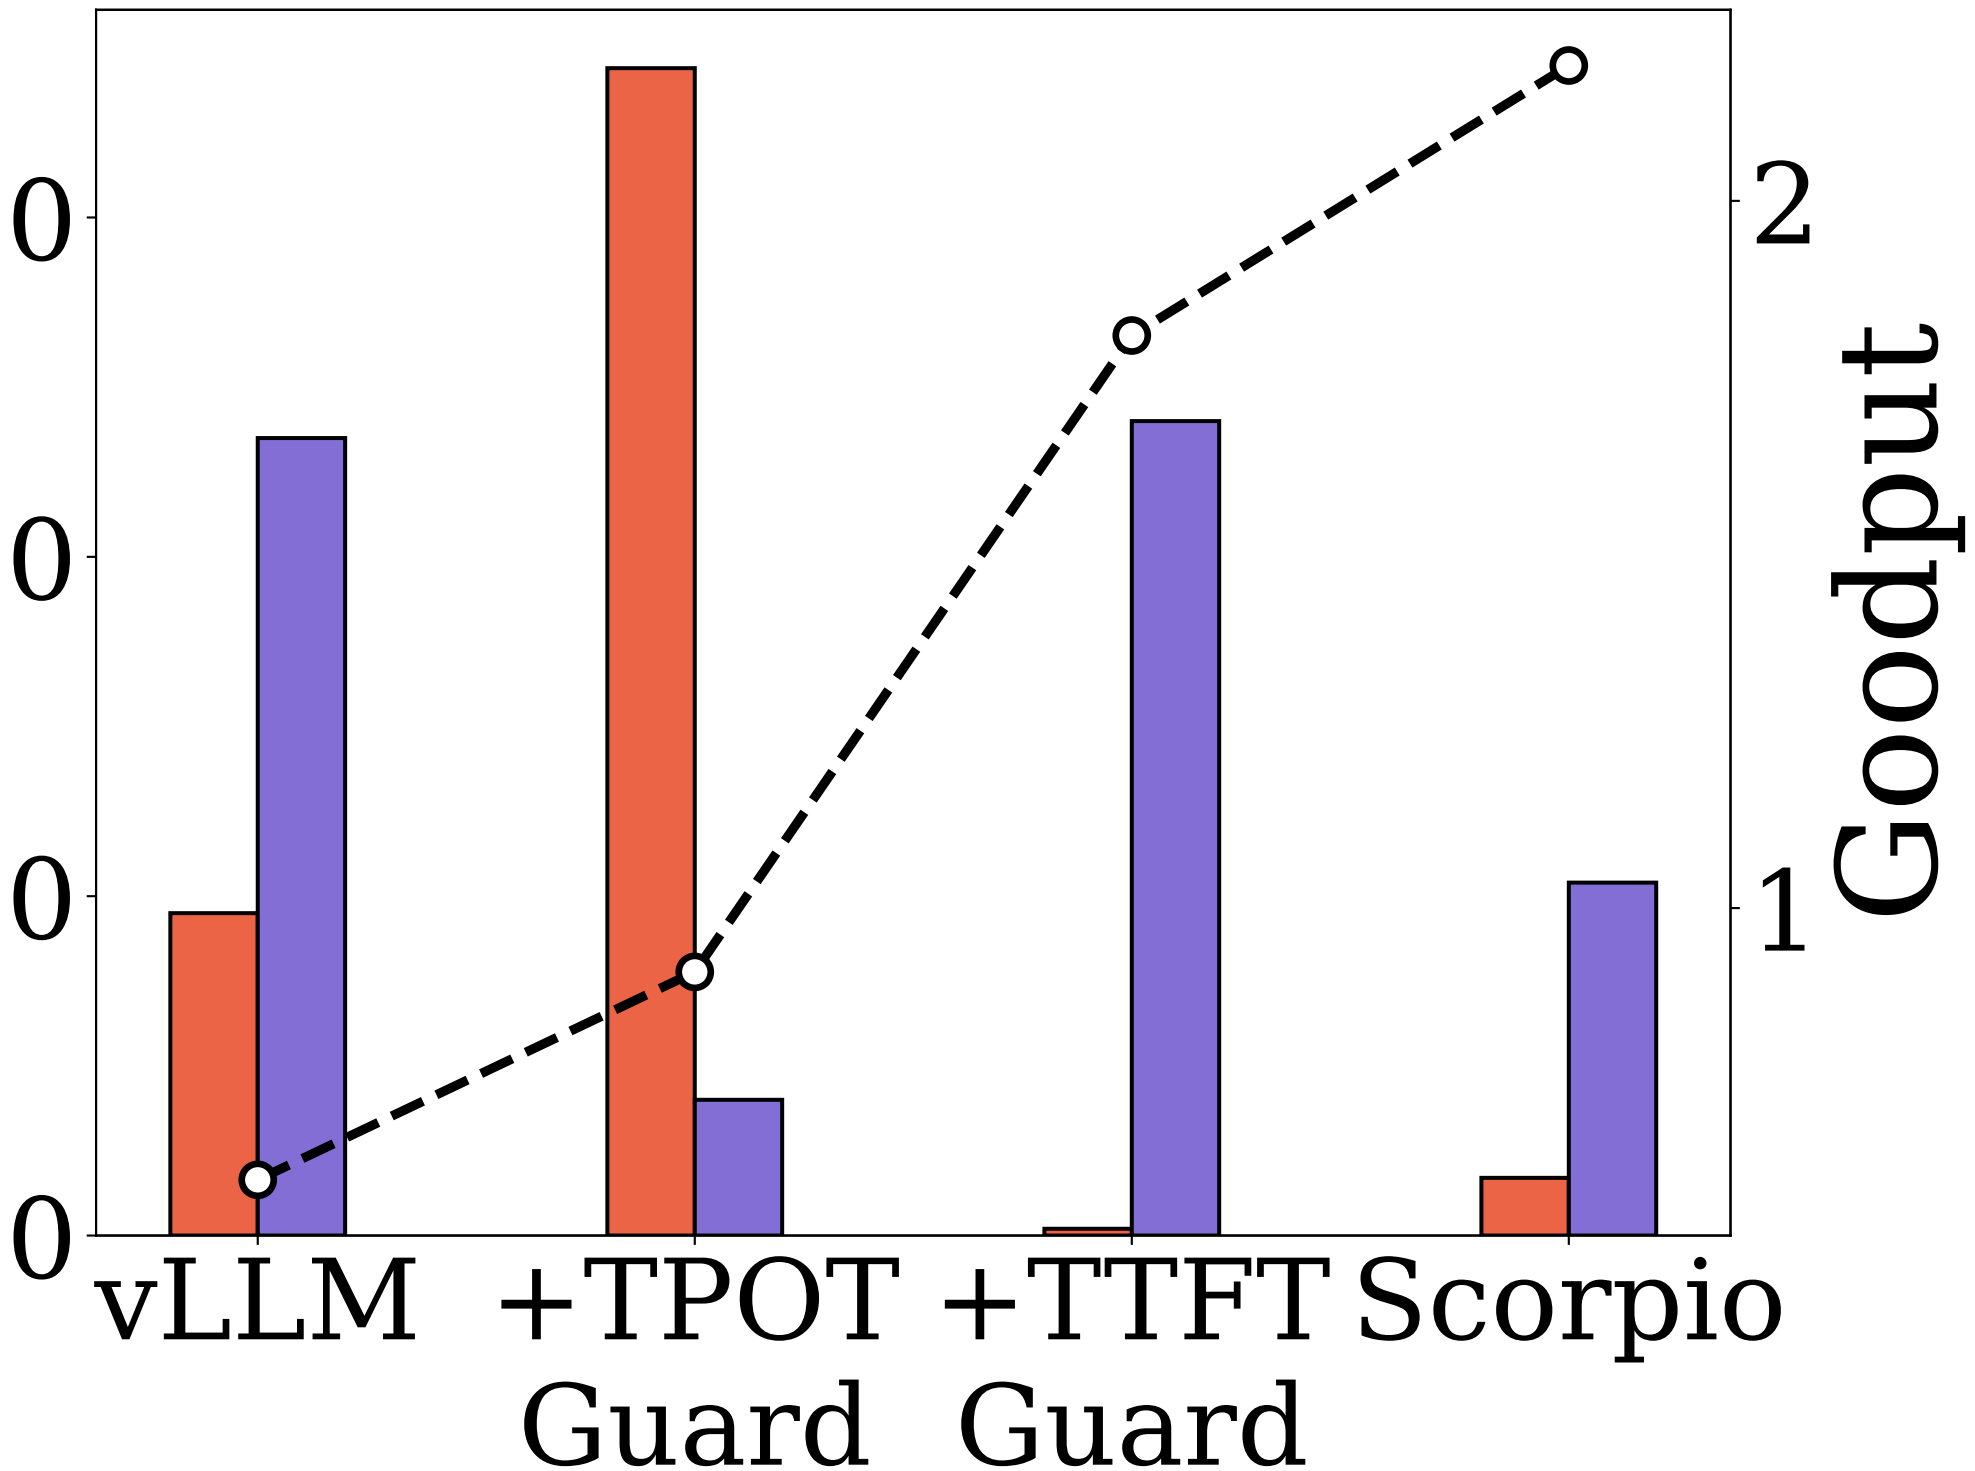

Supplement: supplementary_material [file ablation.pdf › scorpio/draw/gemma27b-sharegpt/exp3_ablation/ablation.pdf]

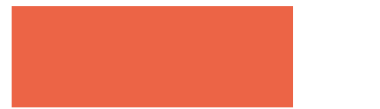

TTFT Violation

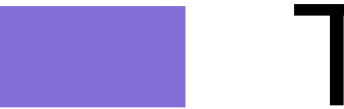

TPOT Violation

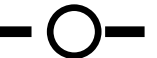

Goodput

Supplement: supplementary_material [file ablation_legend.pdf › scorpio/draw/legend/ablation_legend.pdf]

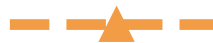

vLLM

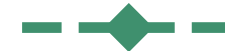

Mooncake

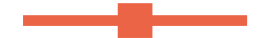

Scorpio

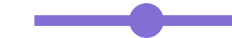

S3

Supplement: supplementary_material [file legend_only.pdf › scorpio/draw/legend/legend_only.pdf]

 Scorpio (Ours)     vLLM     Mooncake     S3

Supplement: supplementary_material [file slo_goodput_legend.pdf › scorpio/draw/legend/slo_goodput_legend.pdf]

# LLaMA-8B LMSYS

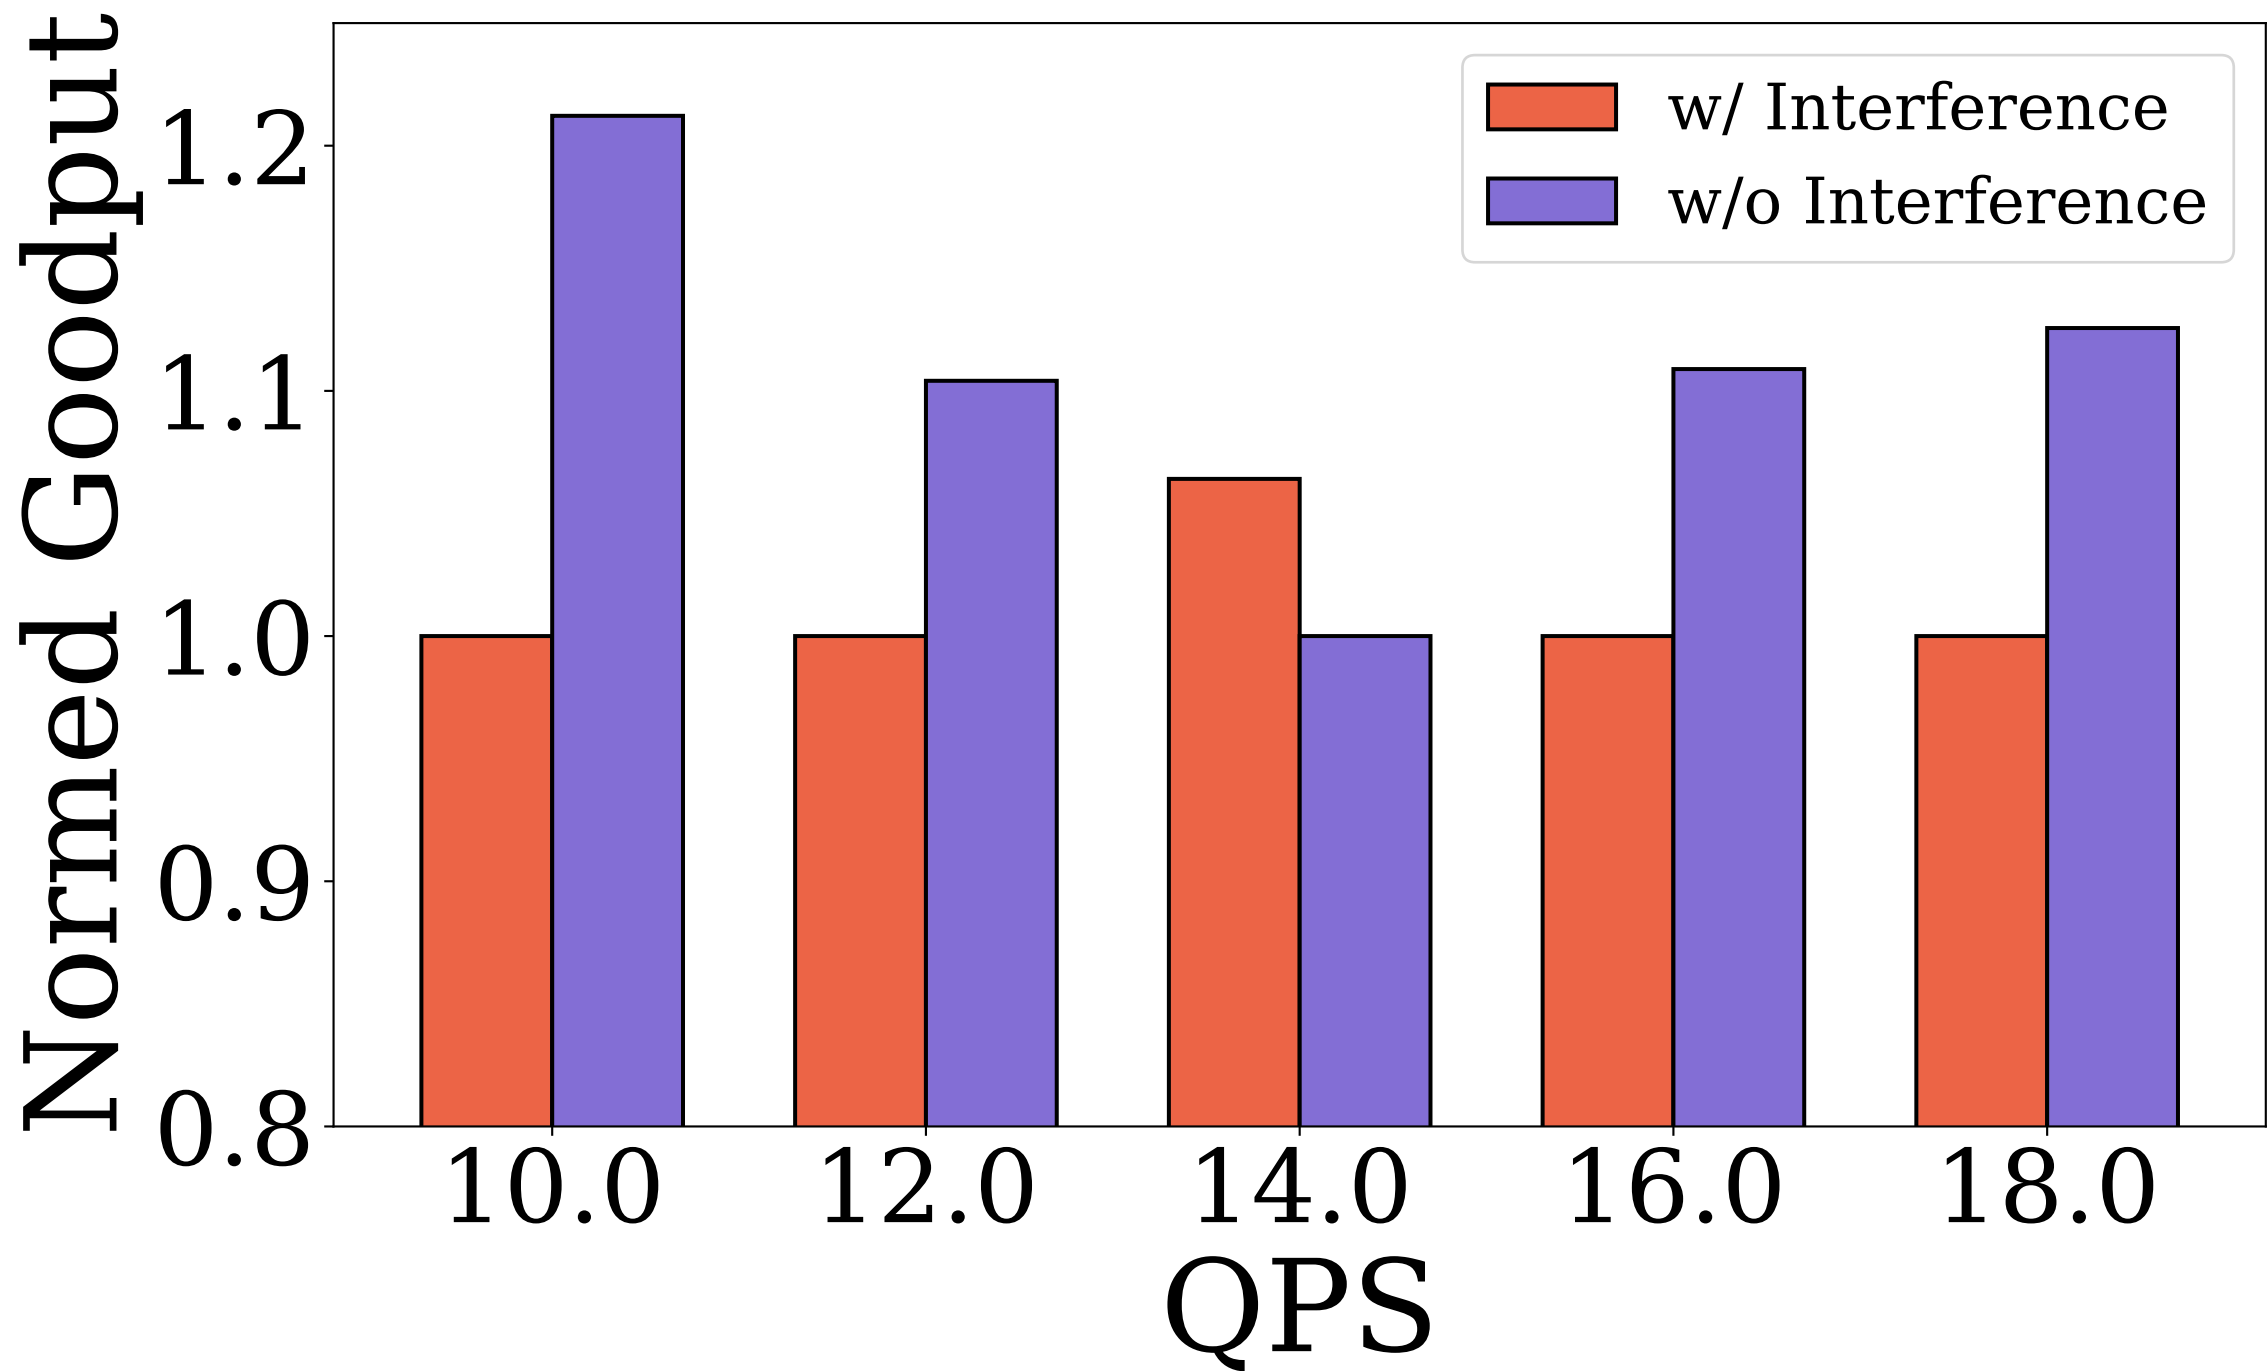

Supplement: supplementary_material [file lmsys_goodput_comparison.pdf › scorpio/draw/llama8b-lmsys/app_interference/lmsys_goodput_comparison.pdf]

# LLaMA-8B LMSYS

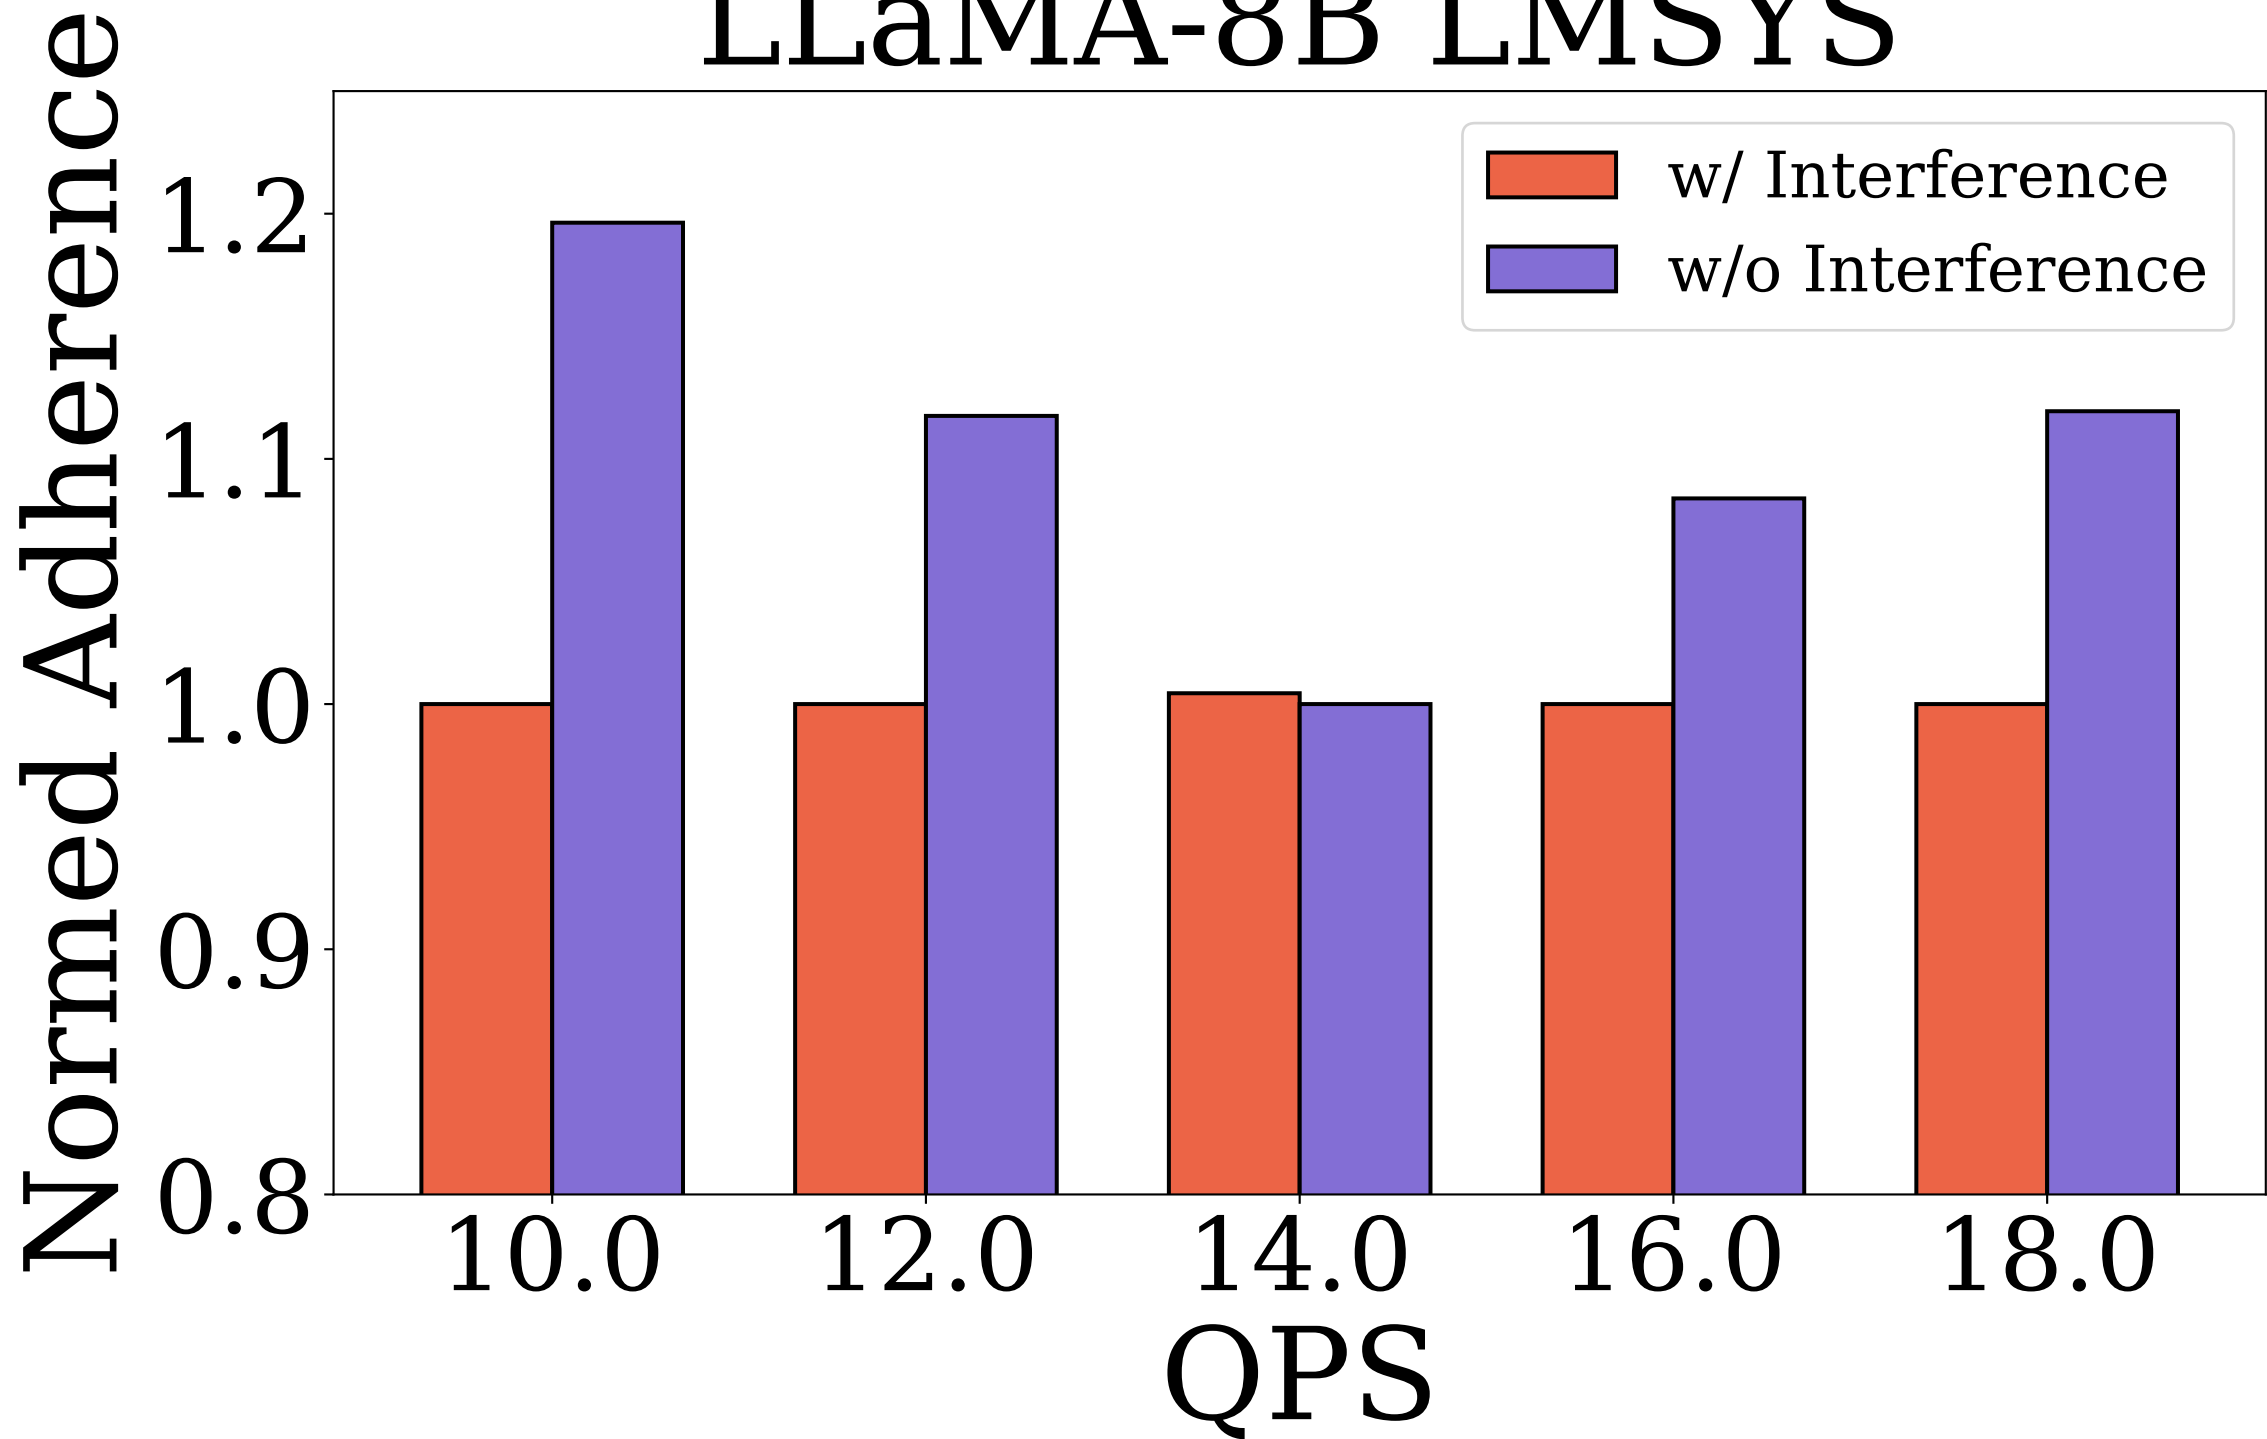

Supplement: supplementary_material [file lmsys_slo_adherence_comparison.pdf › scorpio/draw/llama8b-lmsys/app_interference/lmsys_slo_adherence_comparison.pdf]

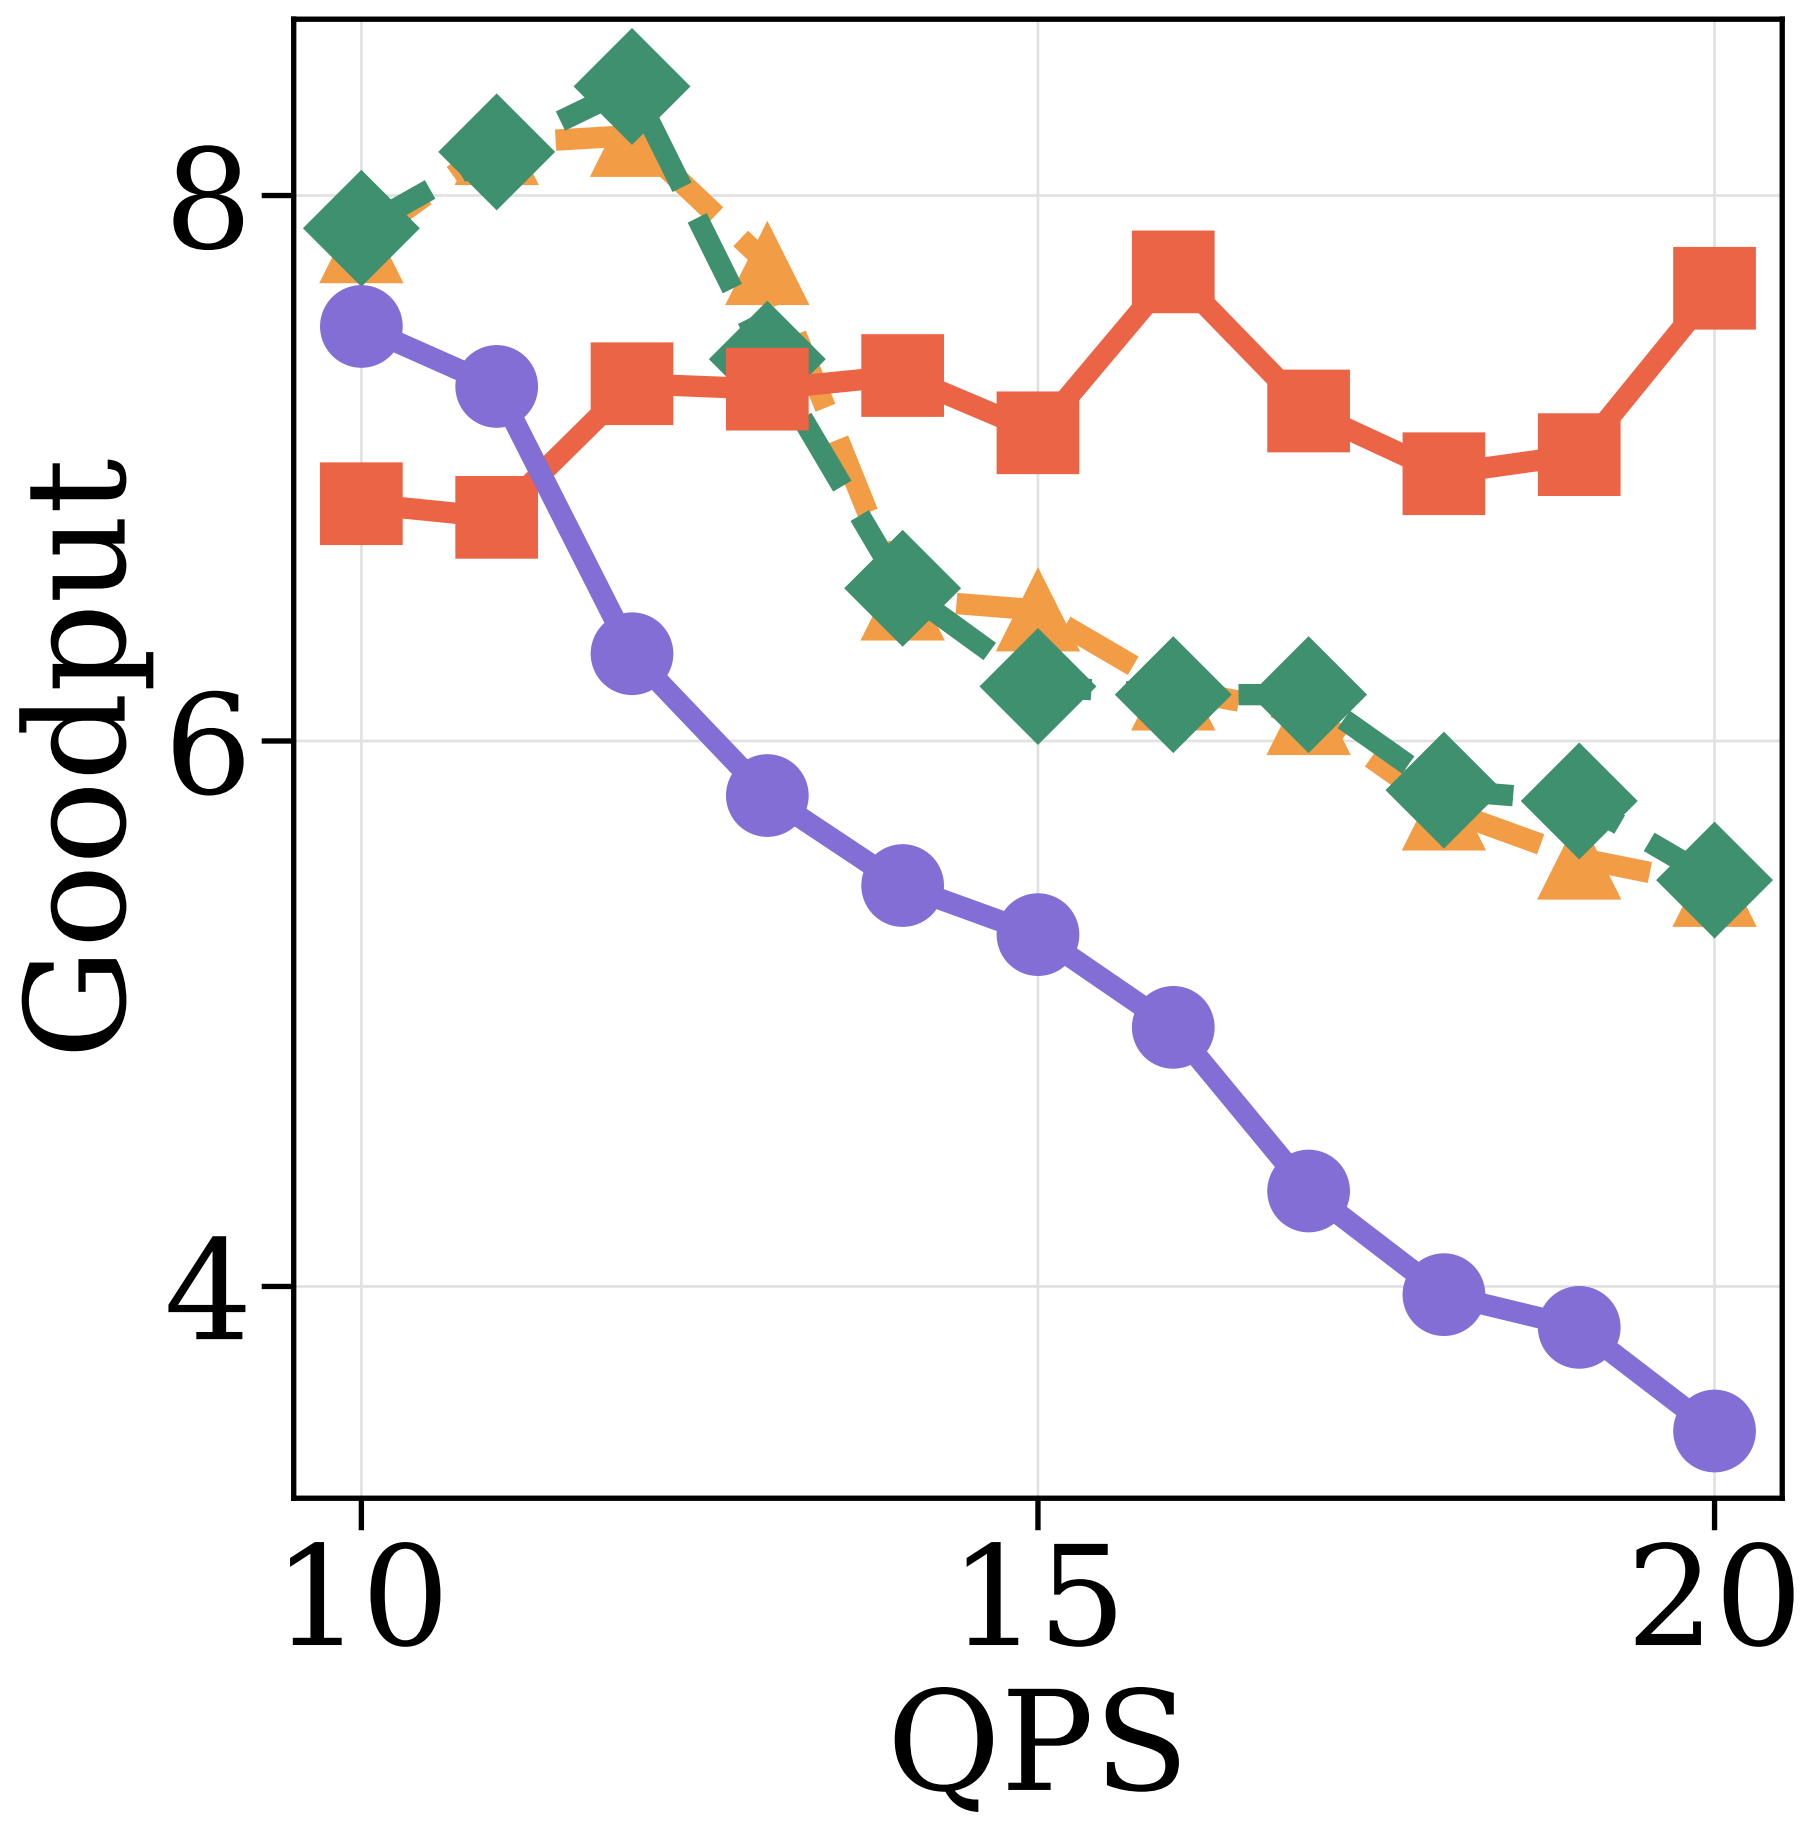

Supplement: supplementary_material [file goodput_vs_qps.pdf › scorpio/draw/llama8b-lmsys/exp1_qps_scaling/goodput_vs_qps.pdf]

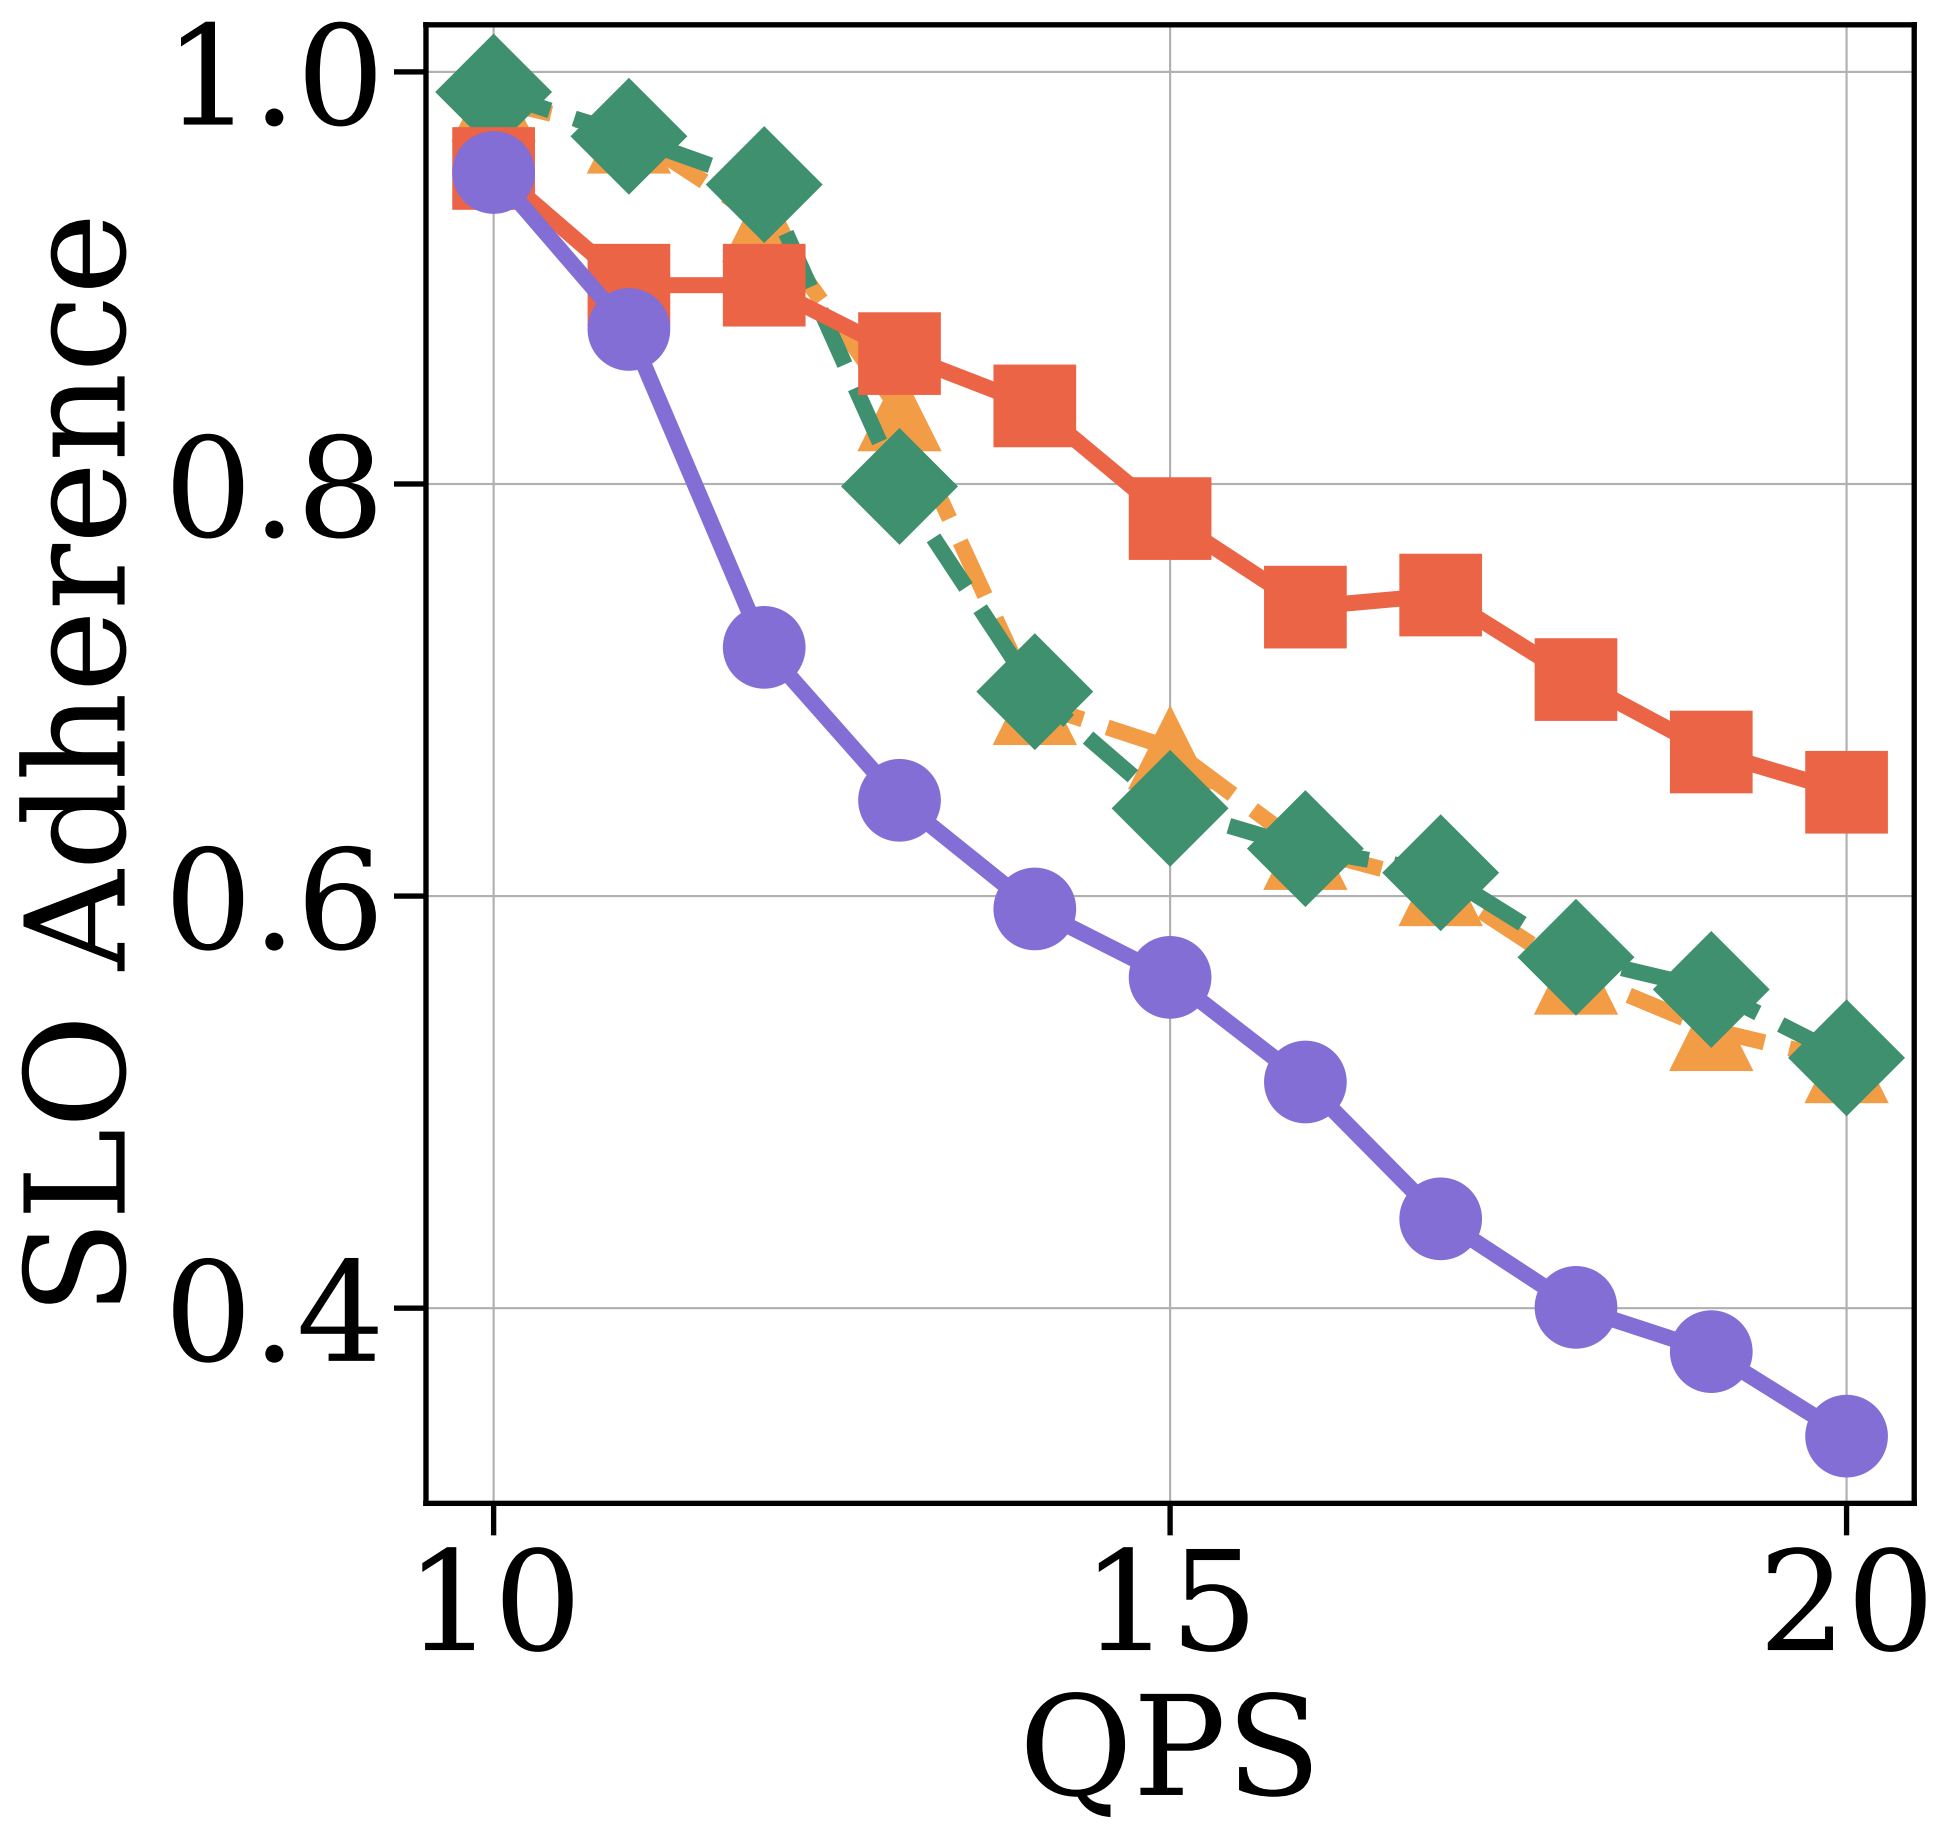

Supplement: supplementary_material [file slo_adherence_vs_qps.pdf › scorpio/draw/llama8b-lmsys/exp1_qps_scaling/slo_adherence_vs_qps.pdf]

 Scorpio(Ours)     vLLM     Mooncake     S3

Supplement: supplementary_material [file slo_goodput_legend.pdf › scorpio/draw/llama8b-lmsys/exp2_trace/slo_goodput_legend.pdf]

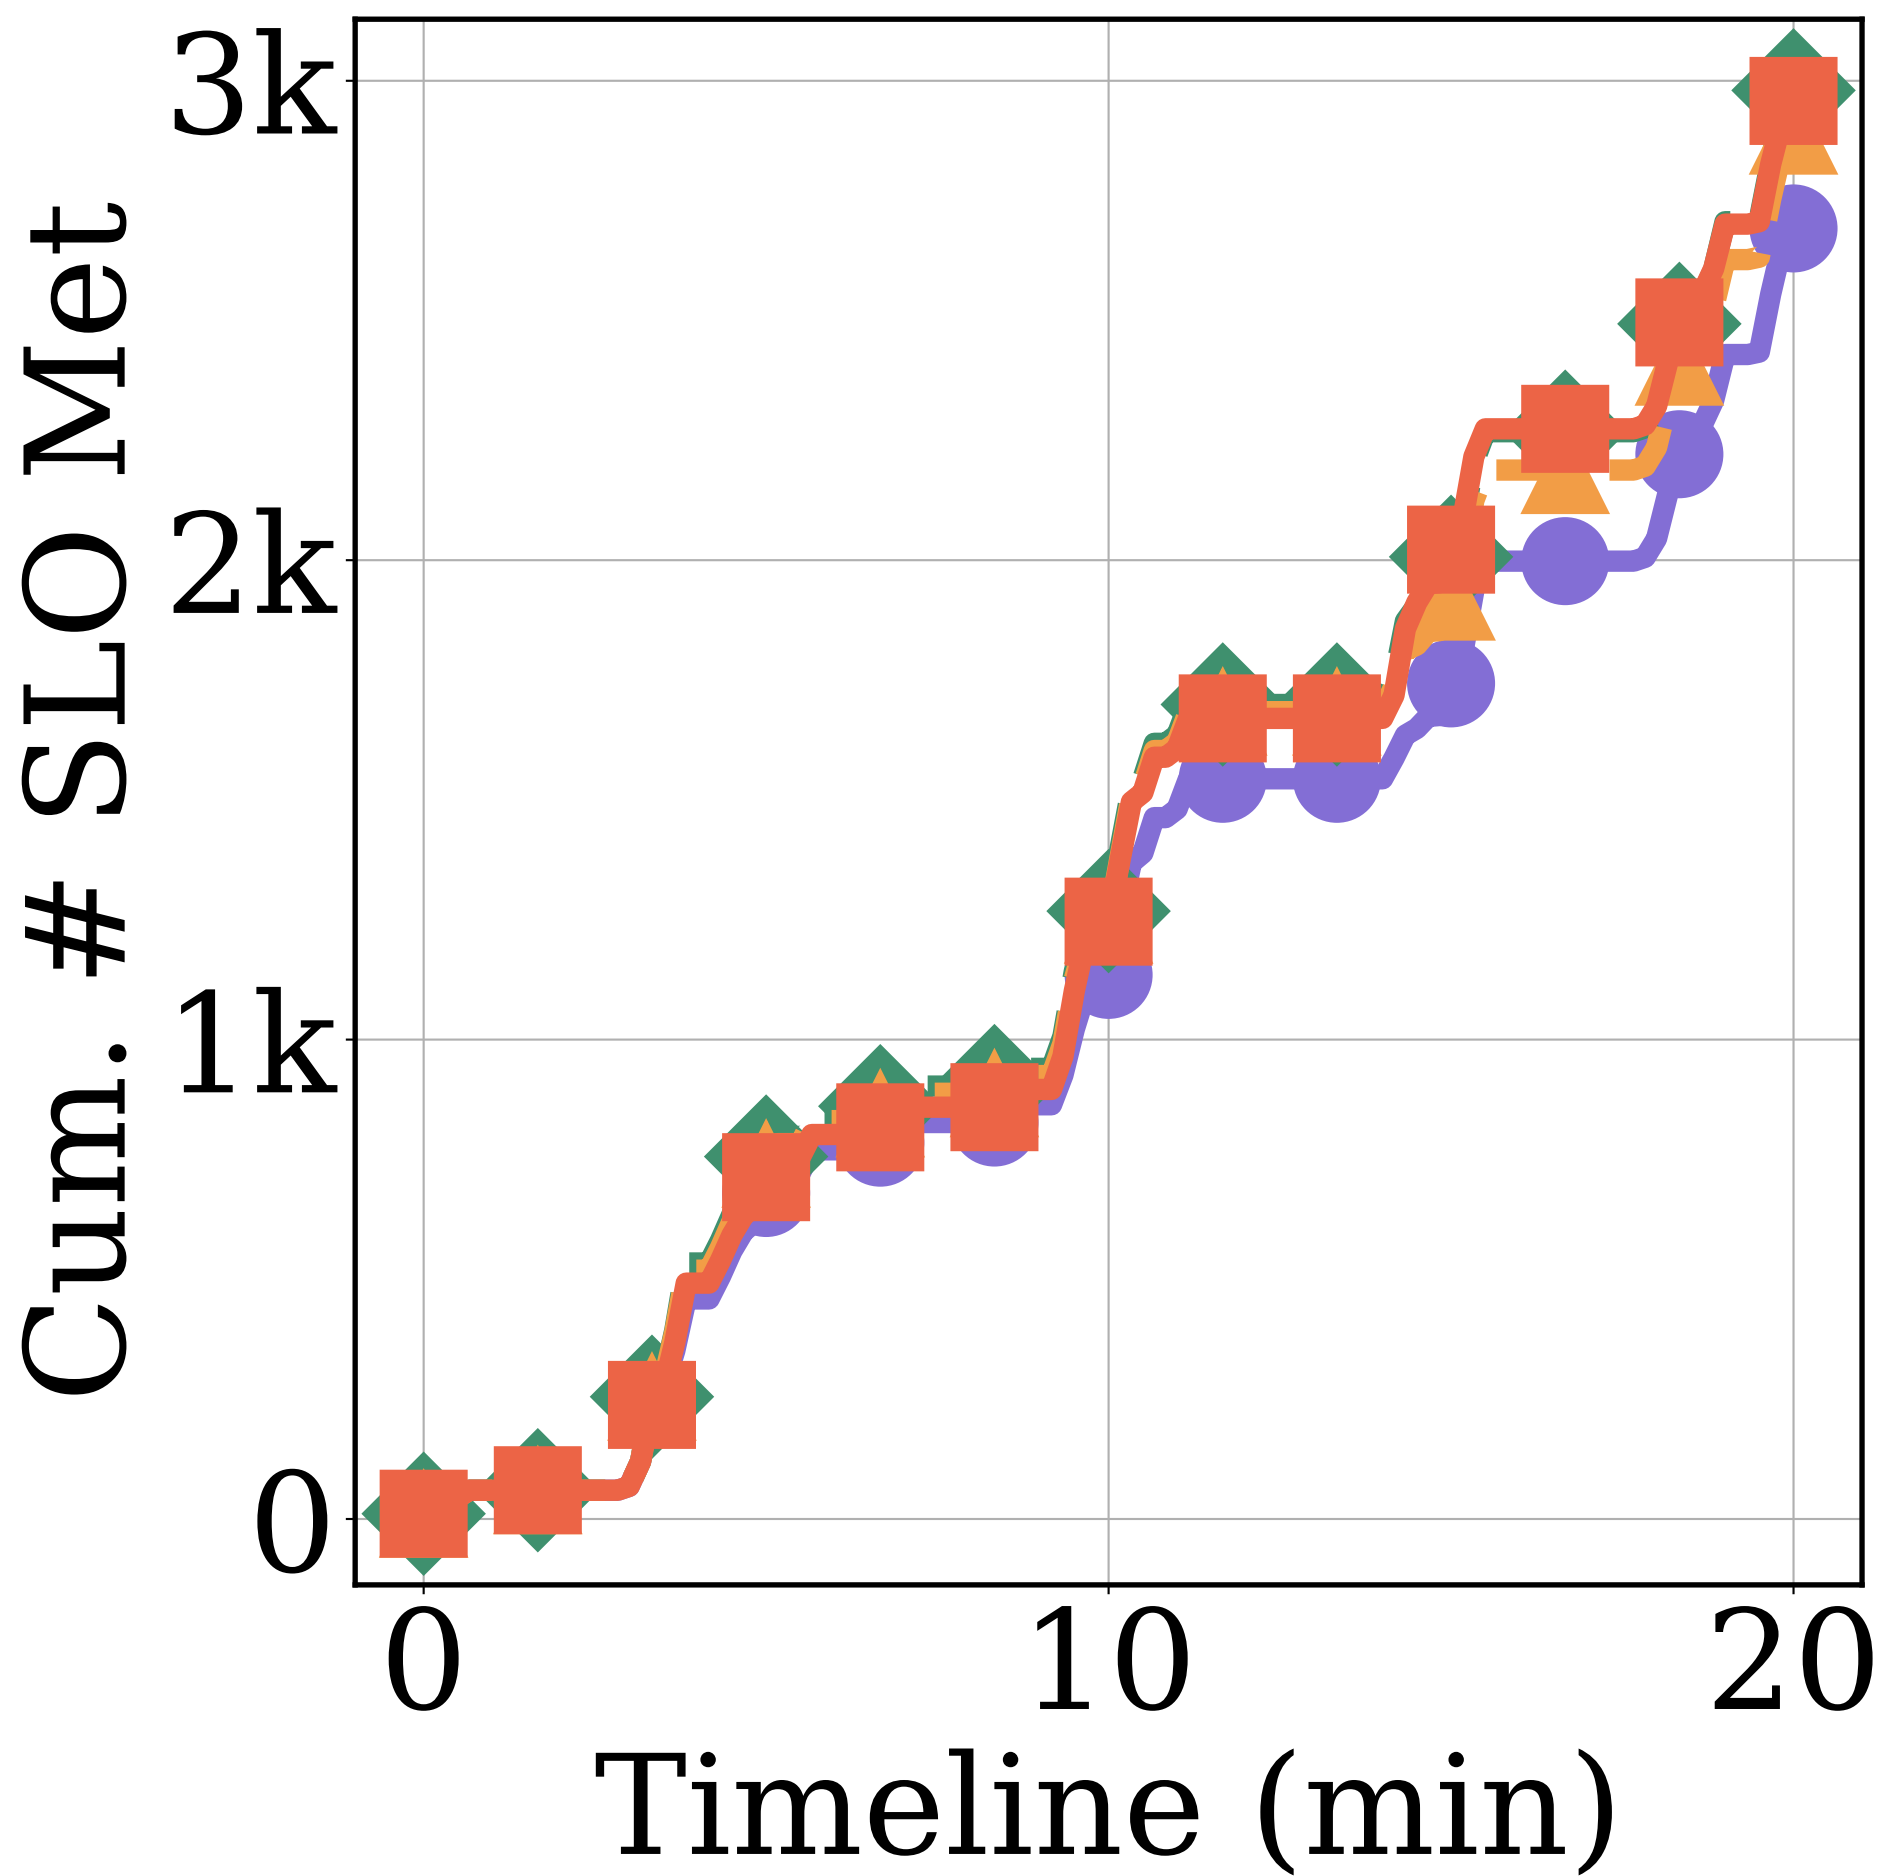

Supplement: supplementary_material [file slo_met_over_time_cdf.pdf › scorpio/draw/llama8b-lmsys/exp2_trace/slo_met_over_time_cdf.pdf]

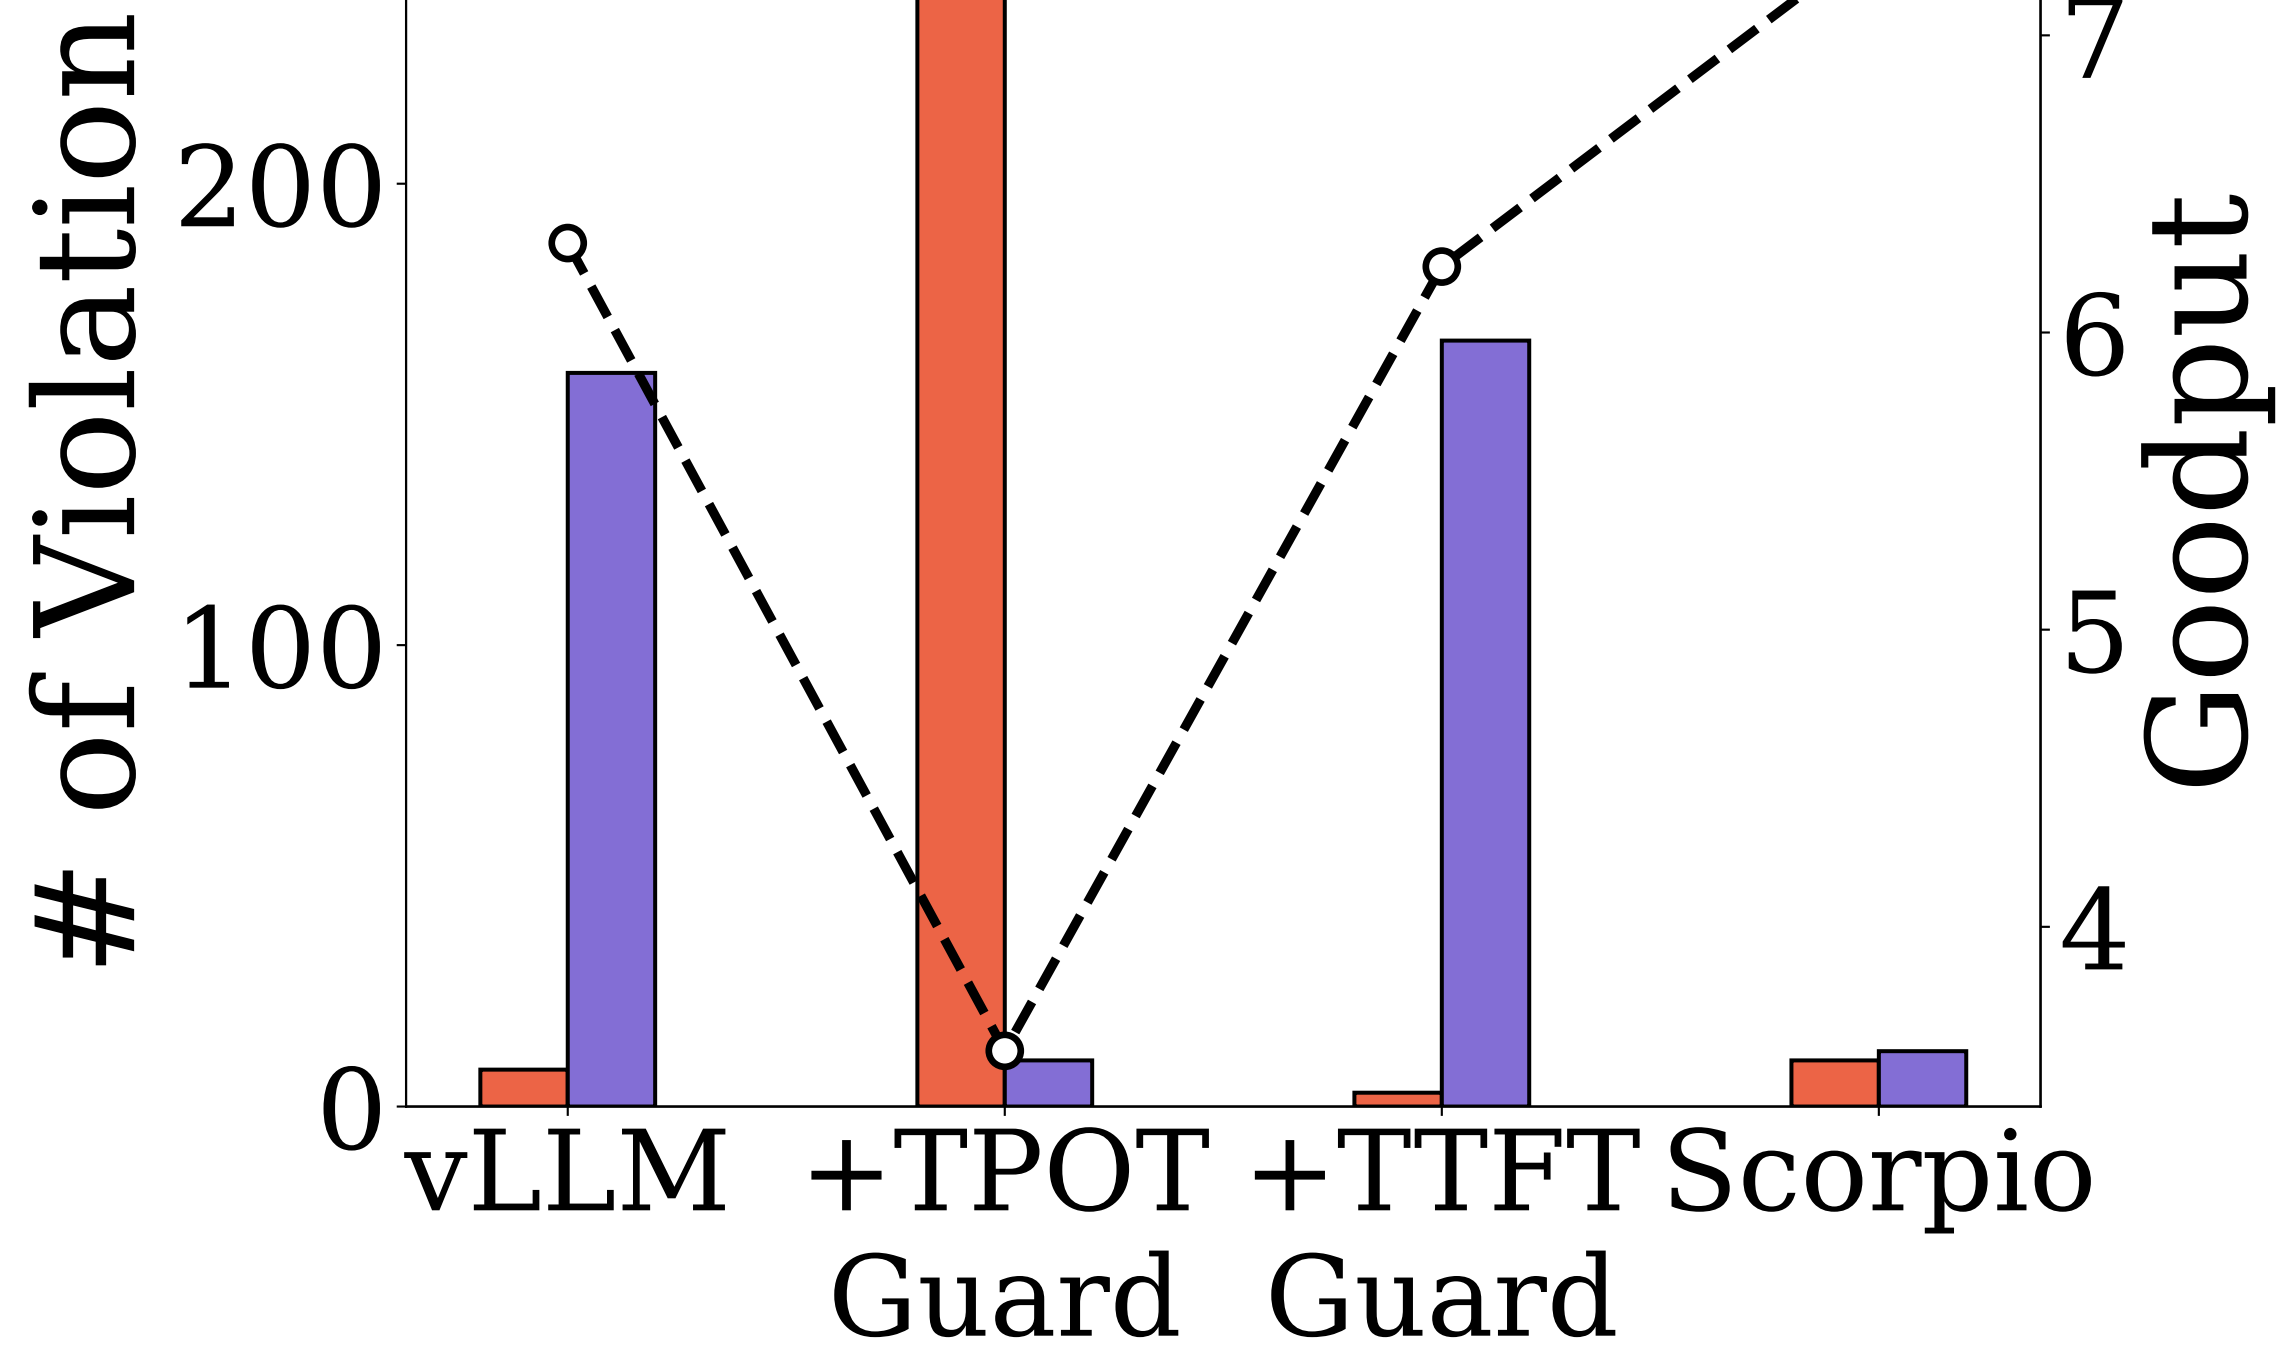

Supplement: supplementary_material [file ablation.pdf › scorpio/draw/llama8b-lmsys/exp3_ablation/ablation.pdf]

# LLaMA-8B ShareGPT

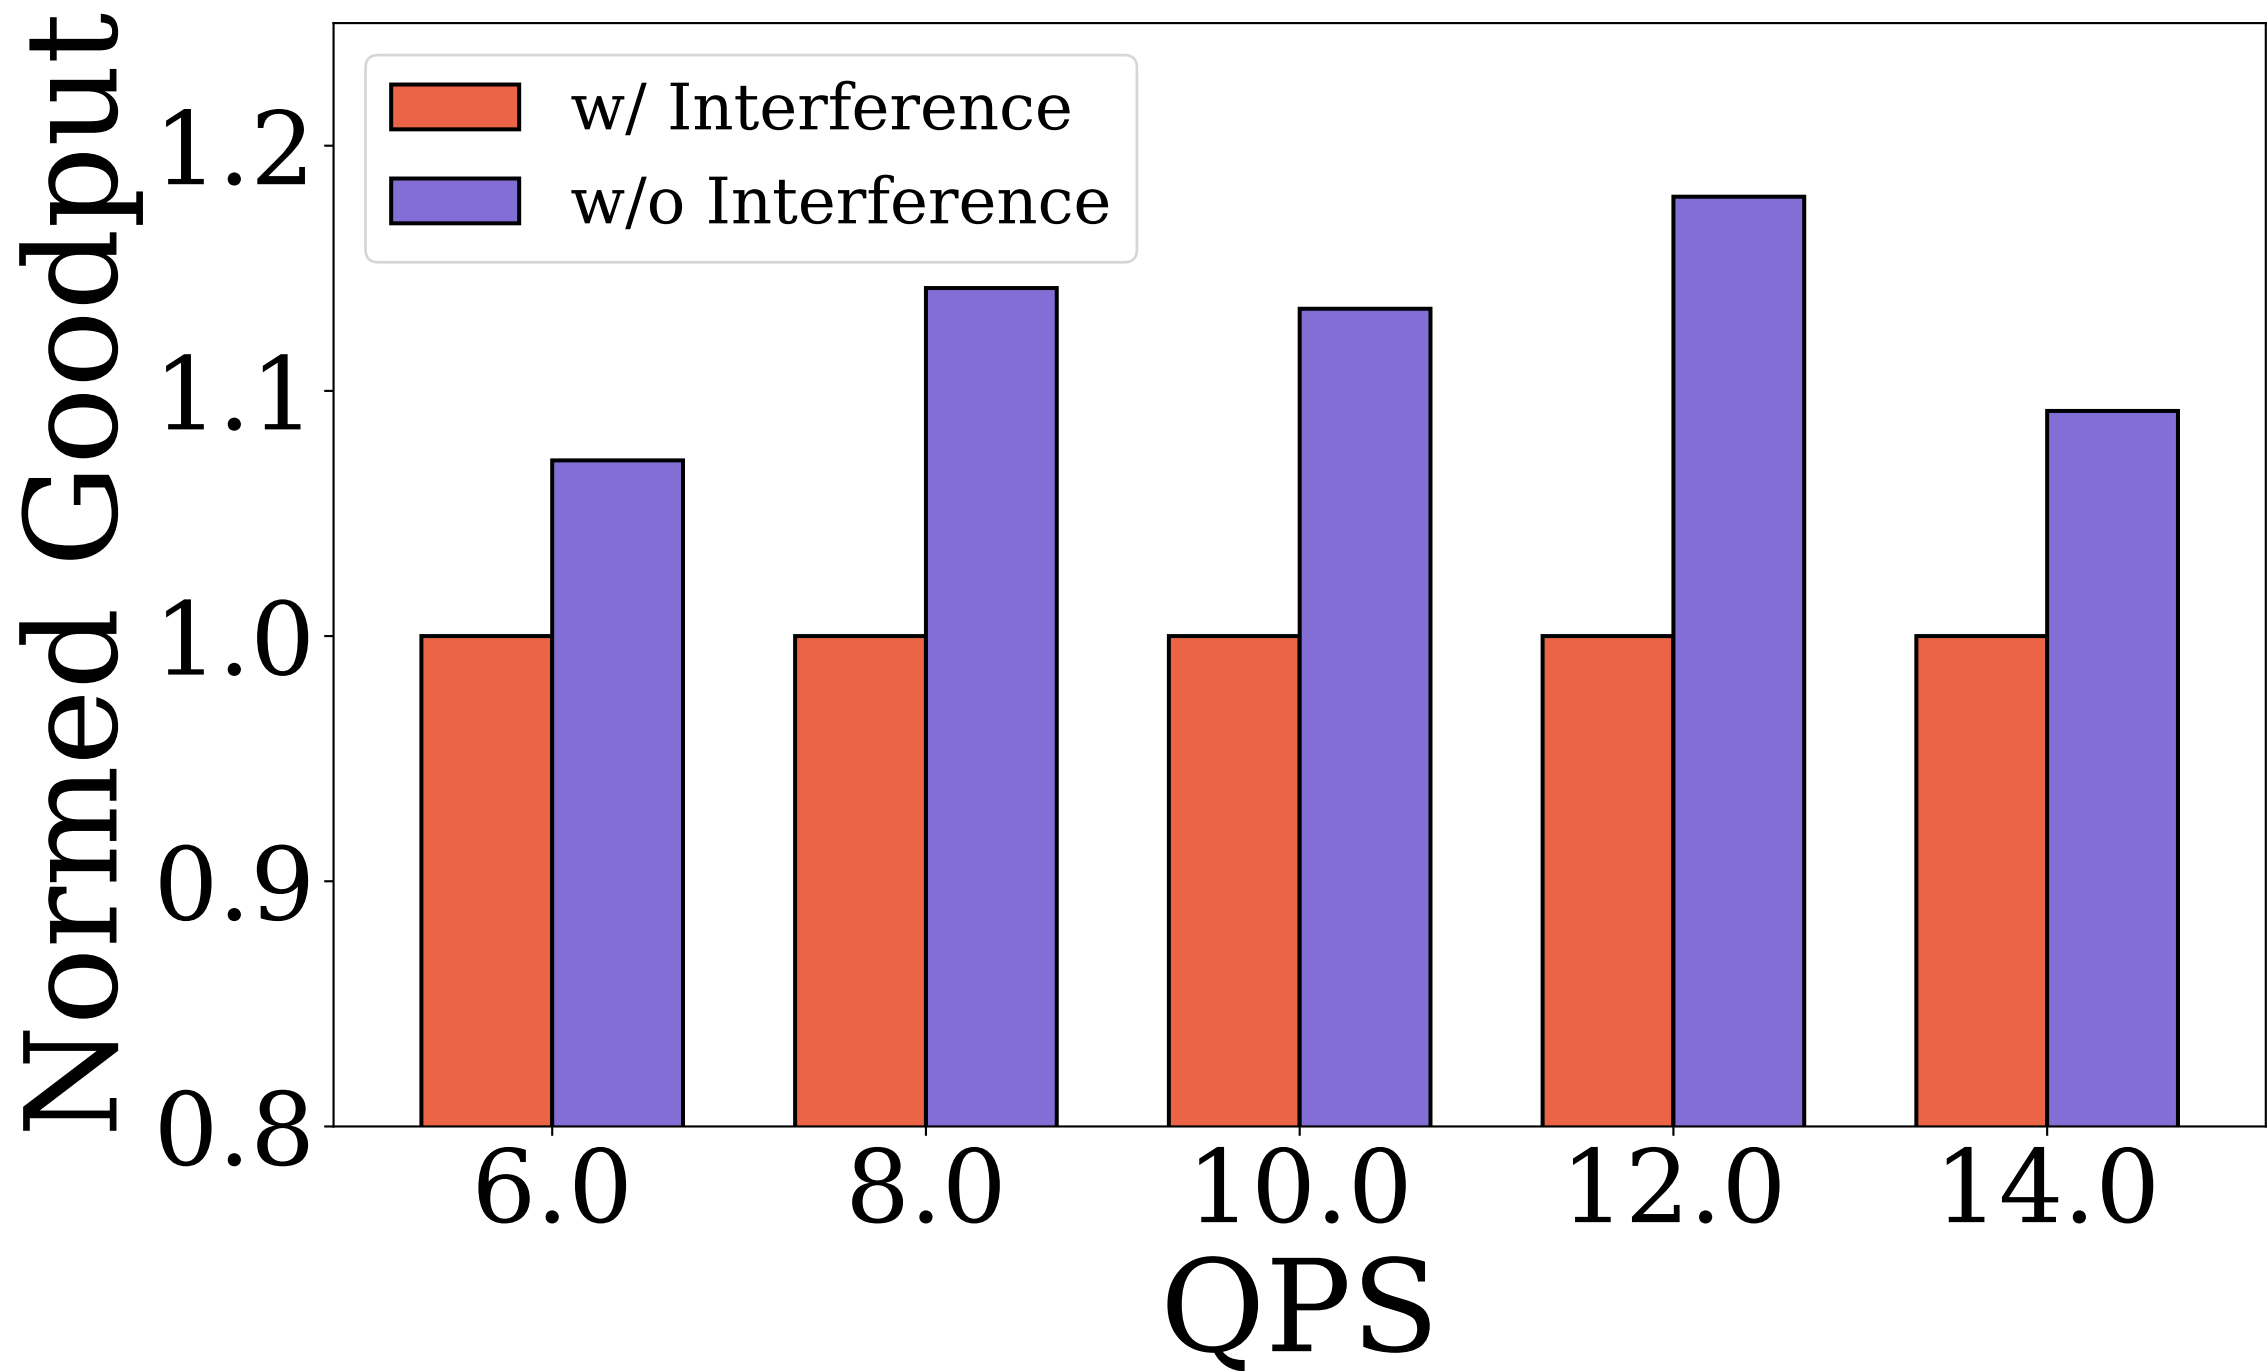

Supplement: supplementary_material [file sharegpt_goodput_comparison.pdf › scorpio/draw/llama8b-sharegpt/app_interference/sharegpt_goodput_comparison.pdf]

# LLaMA-8B ShareGPT

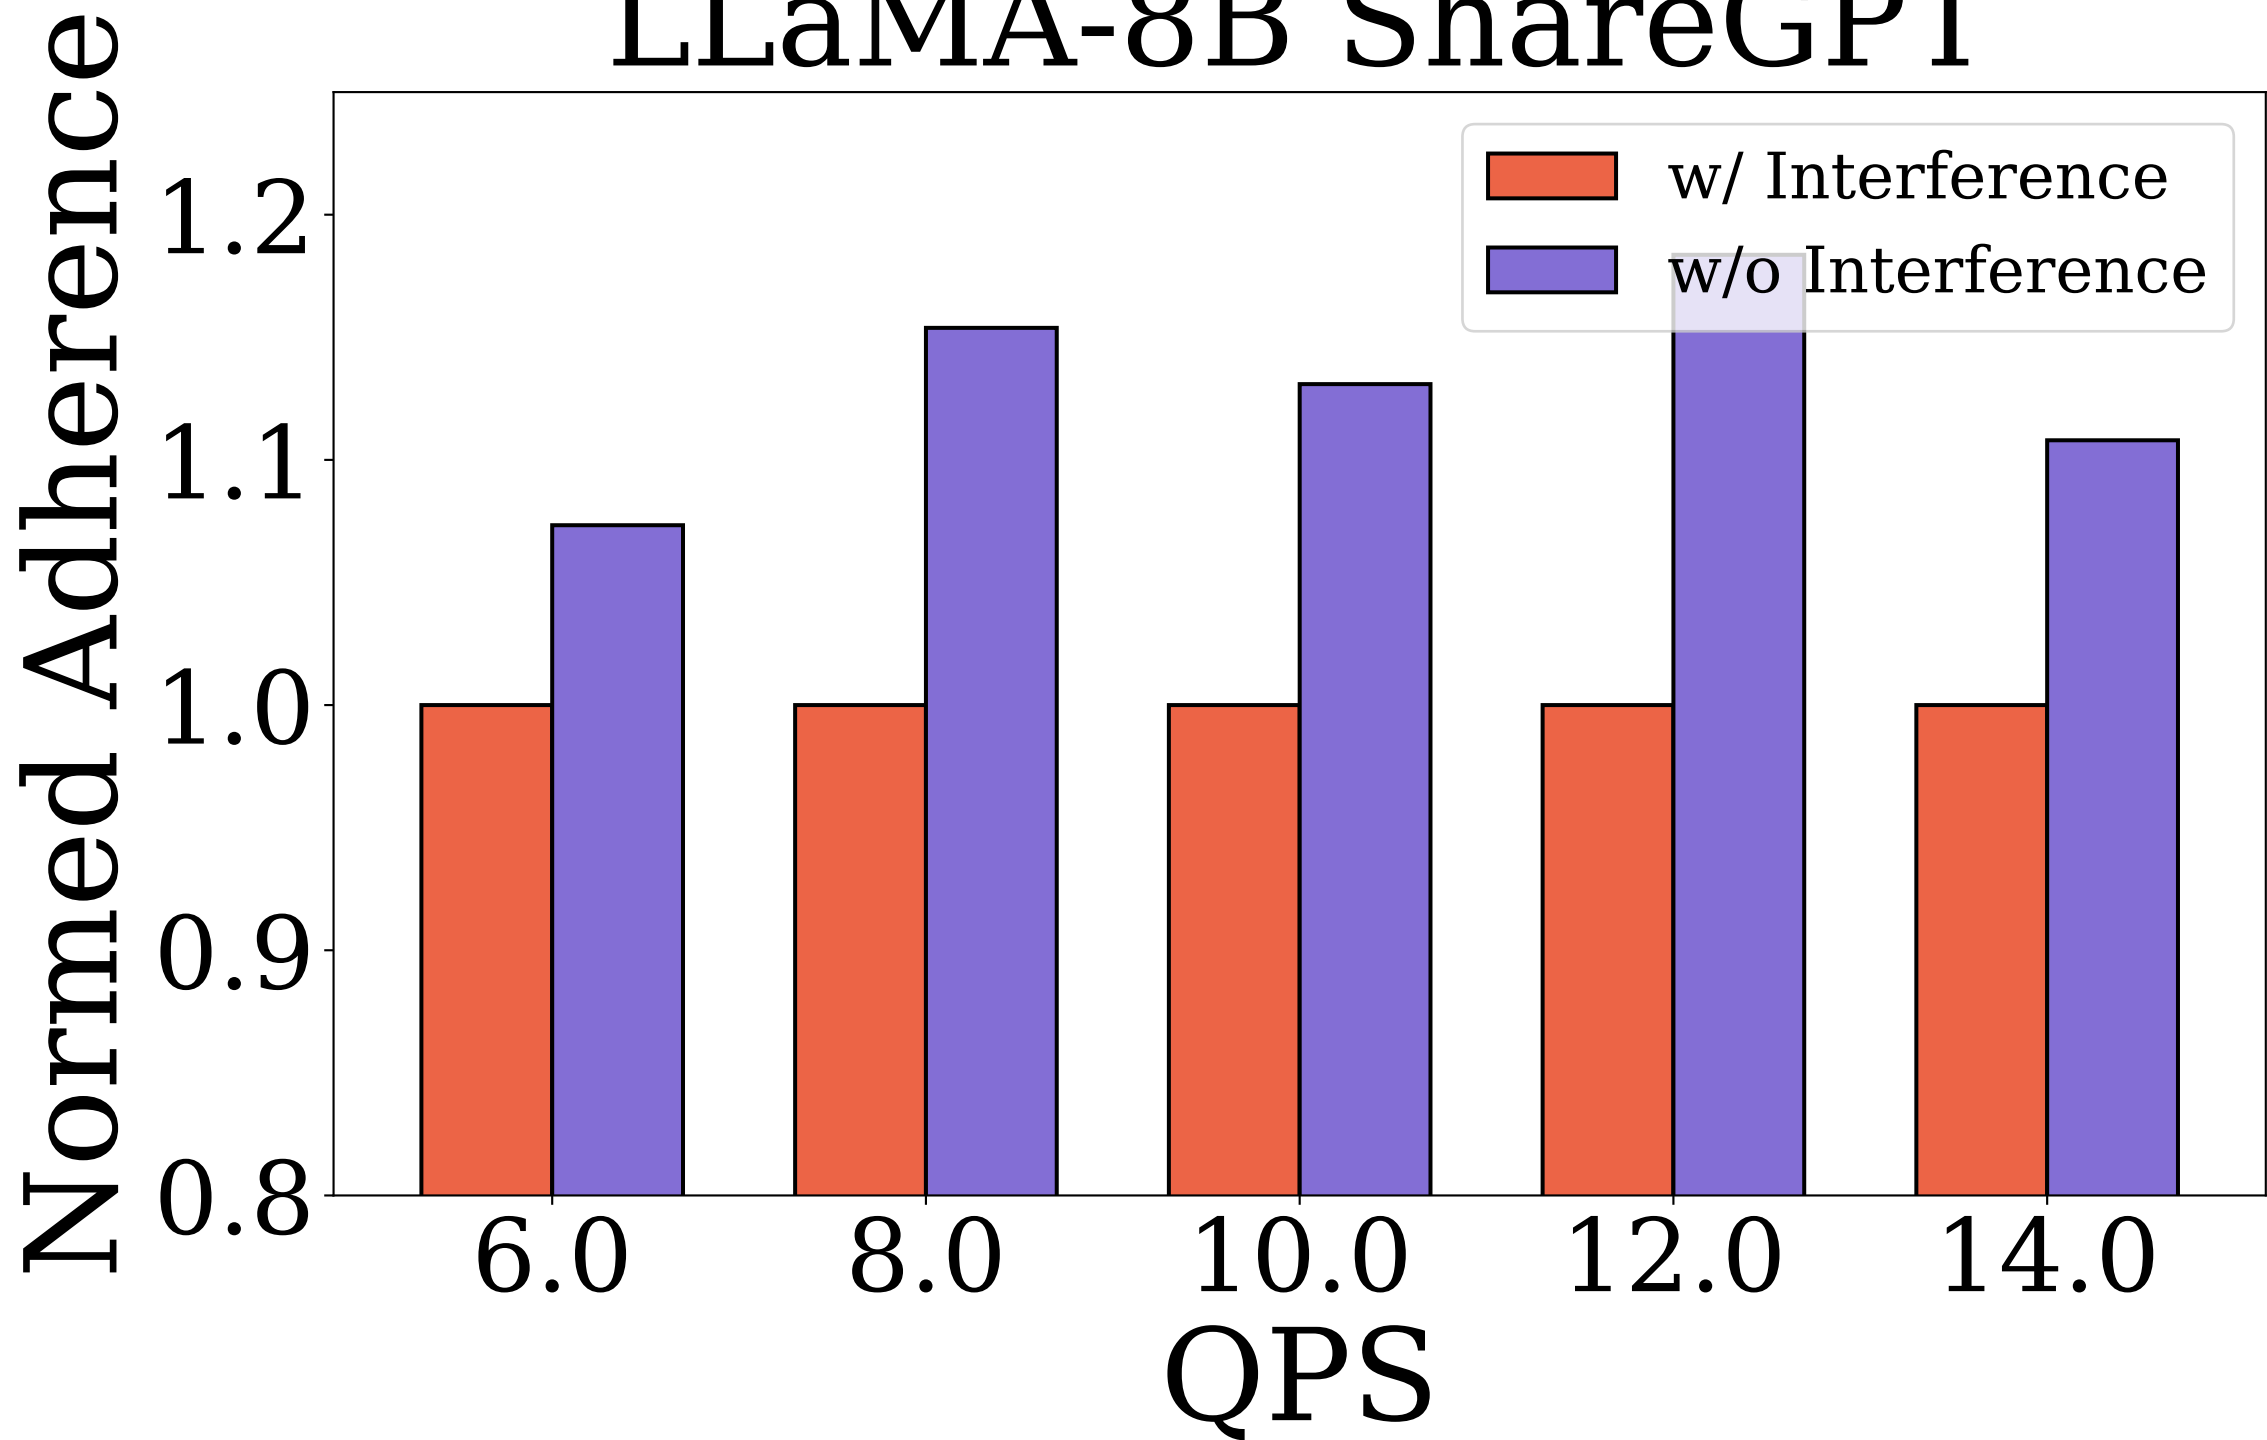

Supplement: supplementary_material [file sharegpt_slo_adherence_comparison.pdf › scorpio/draw/llama8b-sharegpt/app_interference/sharegpt_slo_adherence_comparison.pdf]

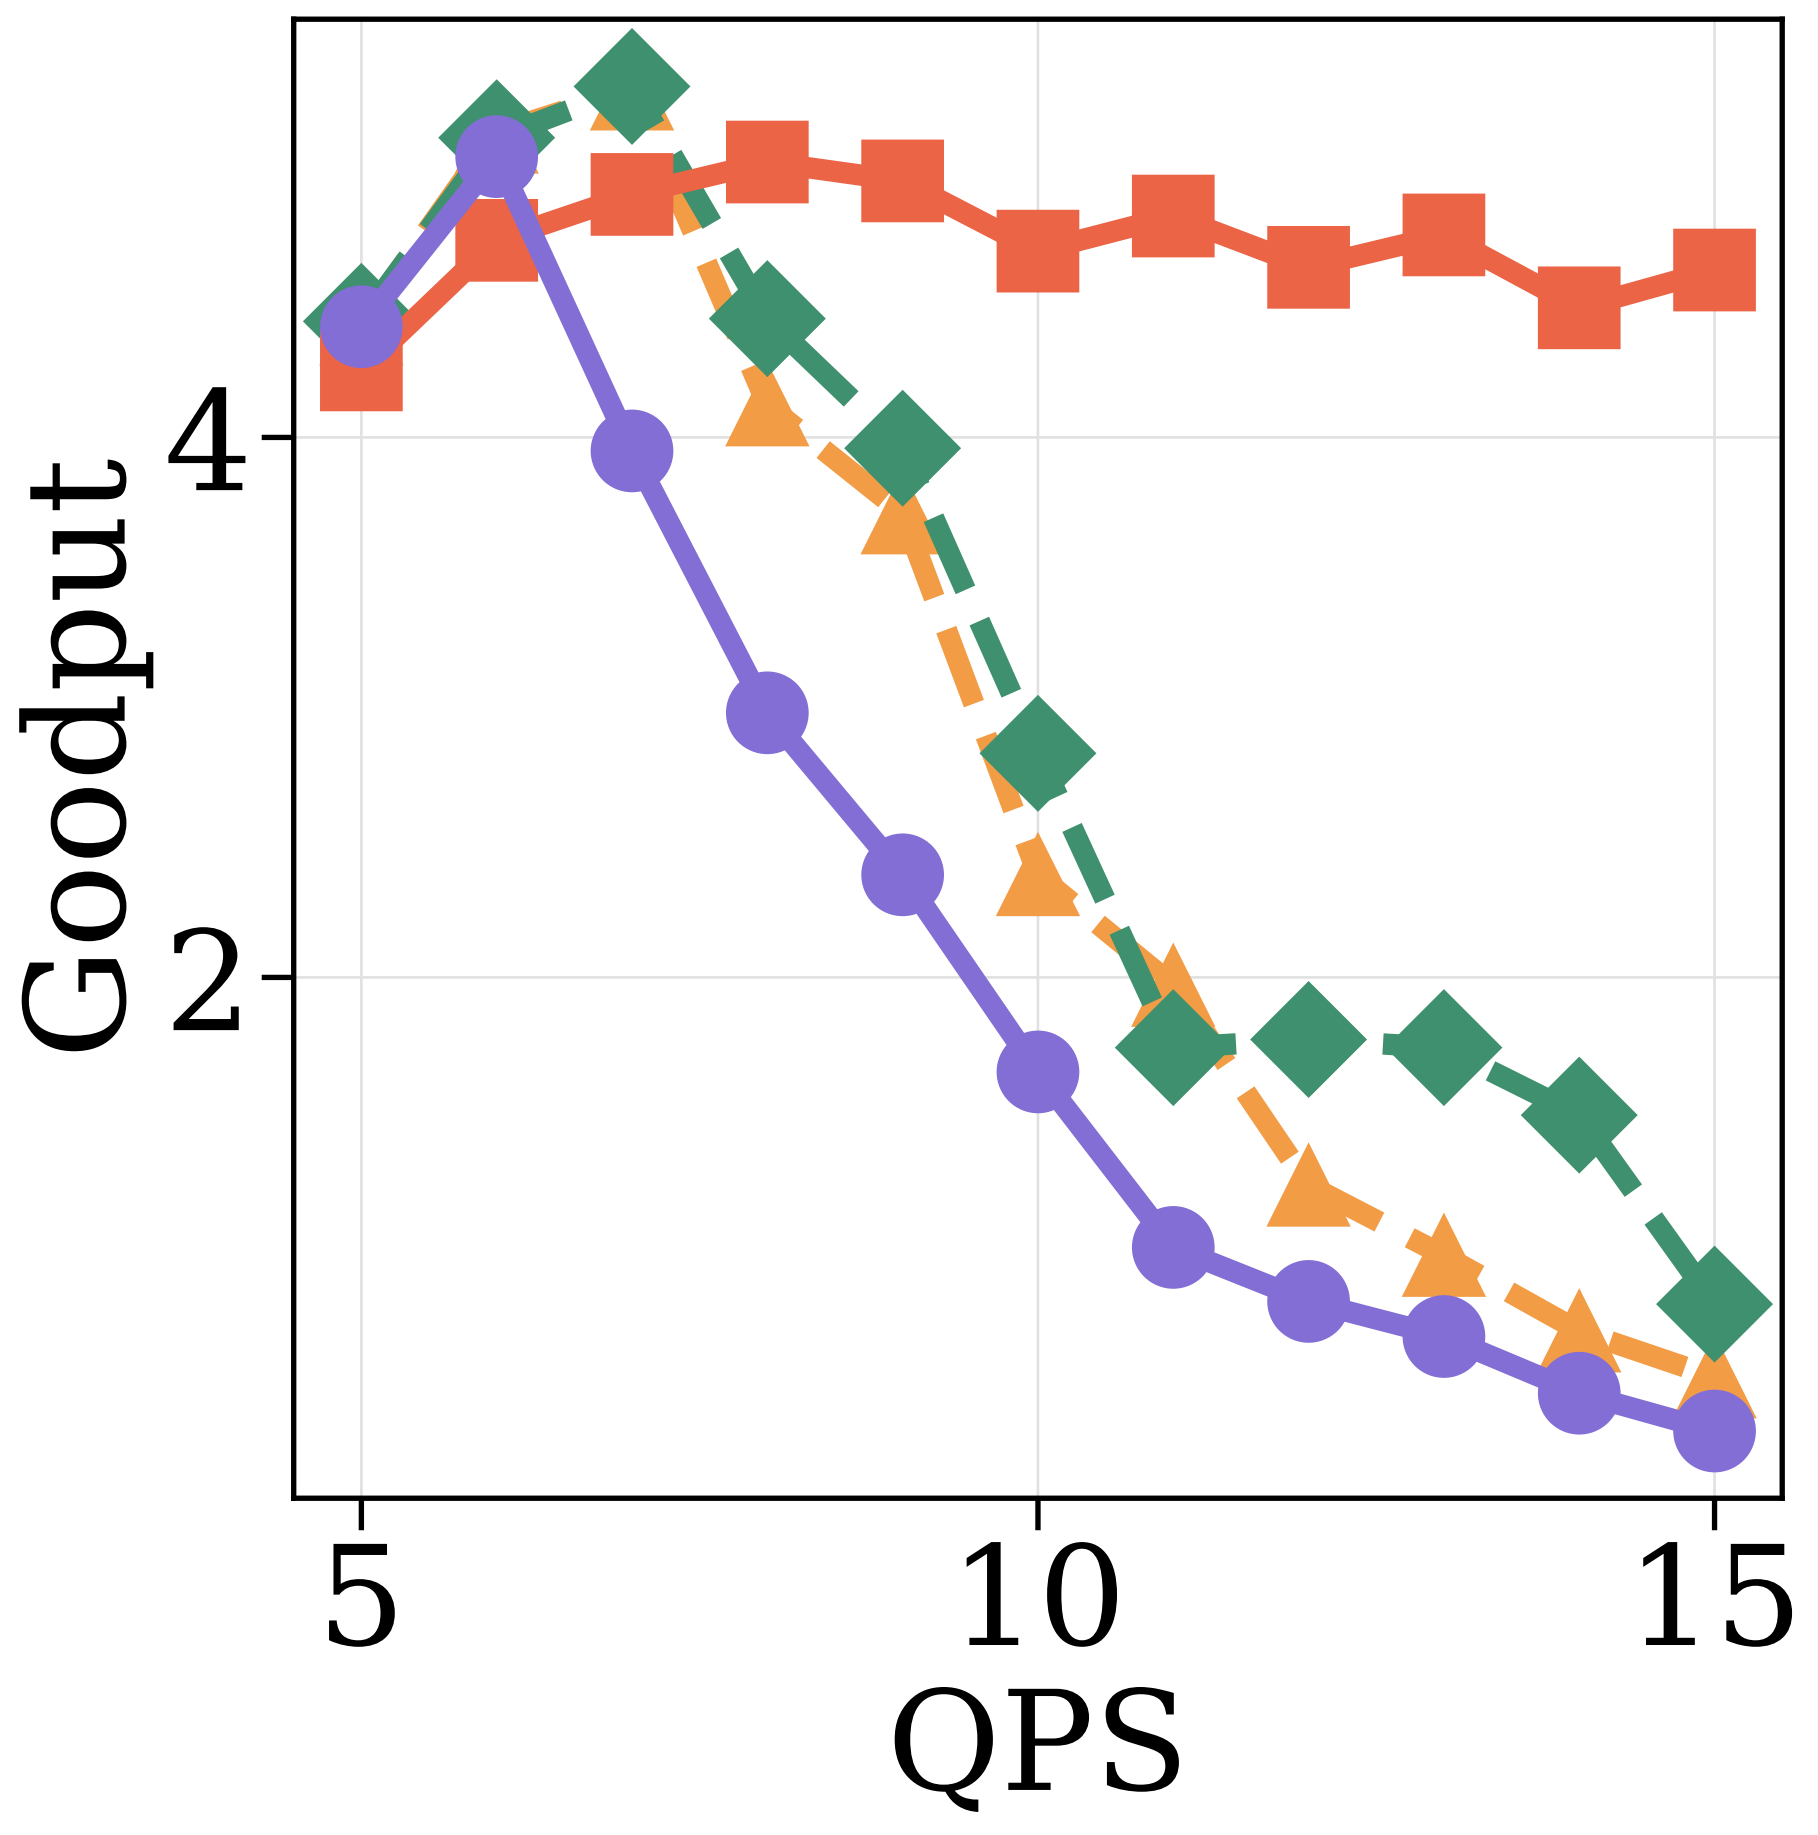

Supplement: supplementary_material [file goodput_vs_qps.pdf › scorpio/draw/llama8b-sharegpt/exp1_qps_scaling/goodput_vs_qps.pdf]

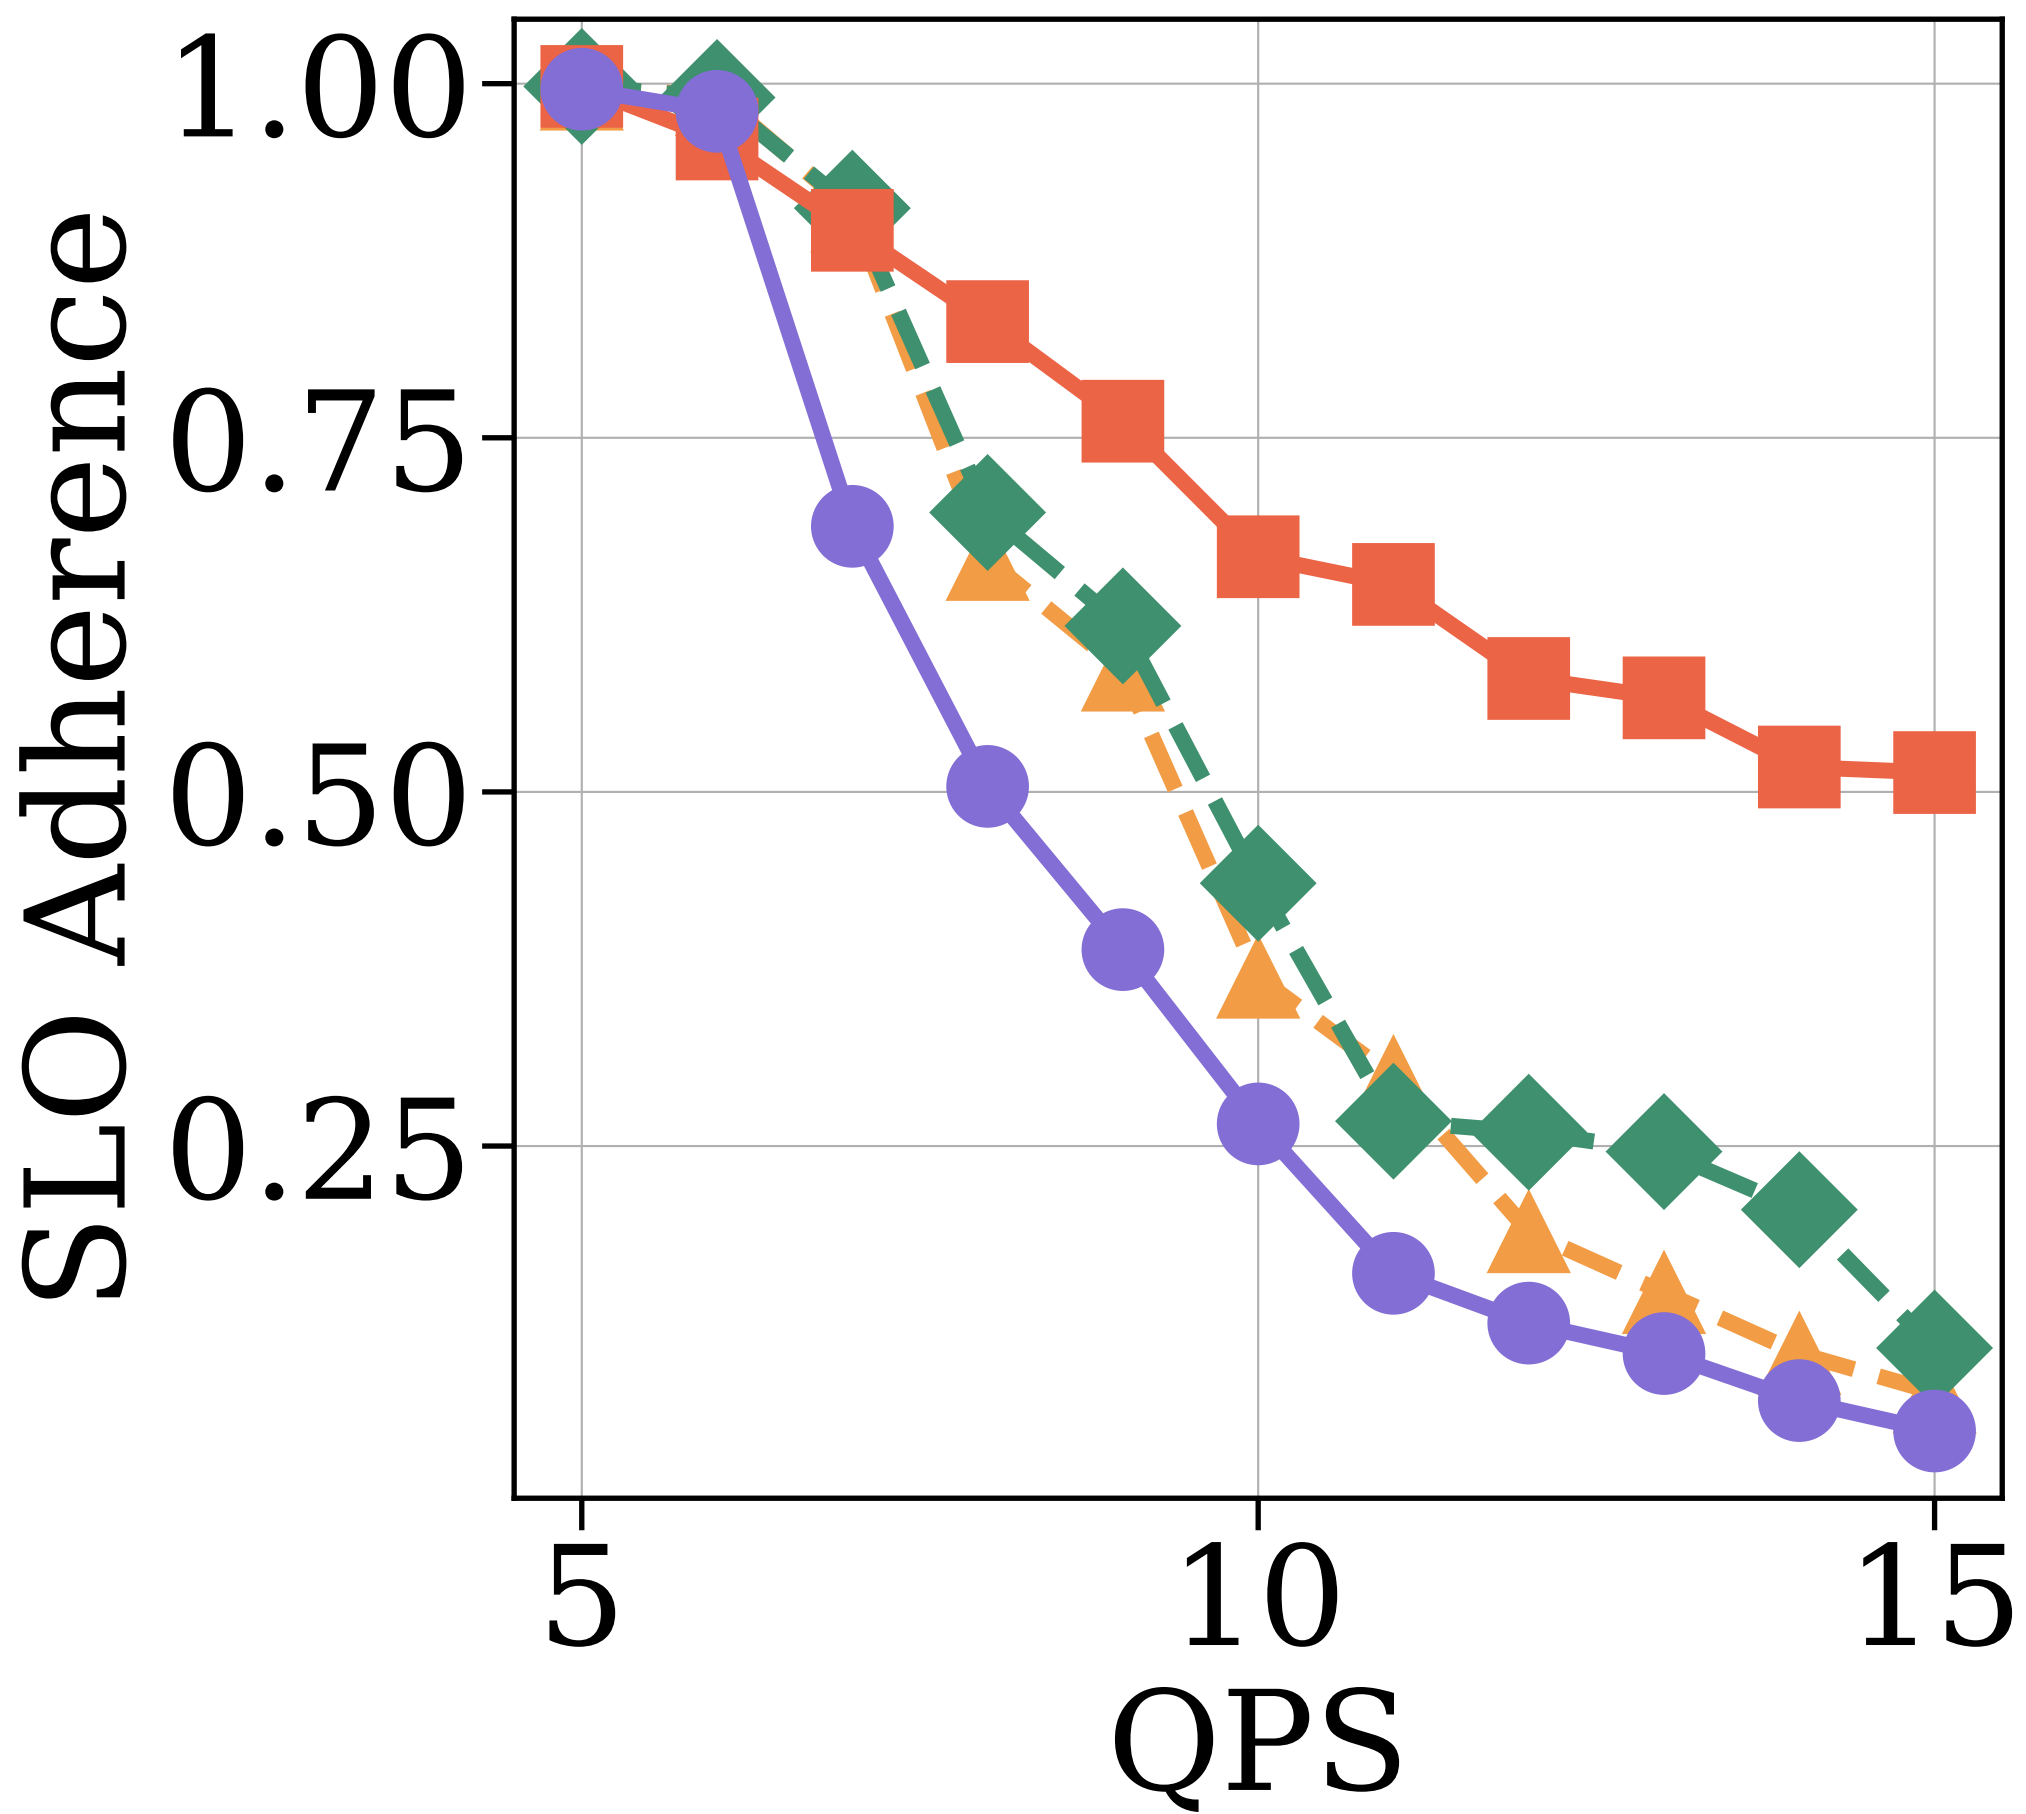

Supplement: supplementary_material [file slo_adherence_vs_qps.pdf › scorpio/draw/llama8b-sharegpt/exp1_qps_scaling/slo_adherence_vs_qps.pdf]

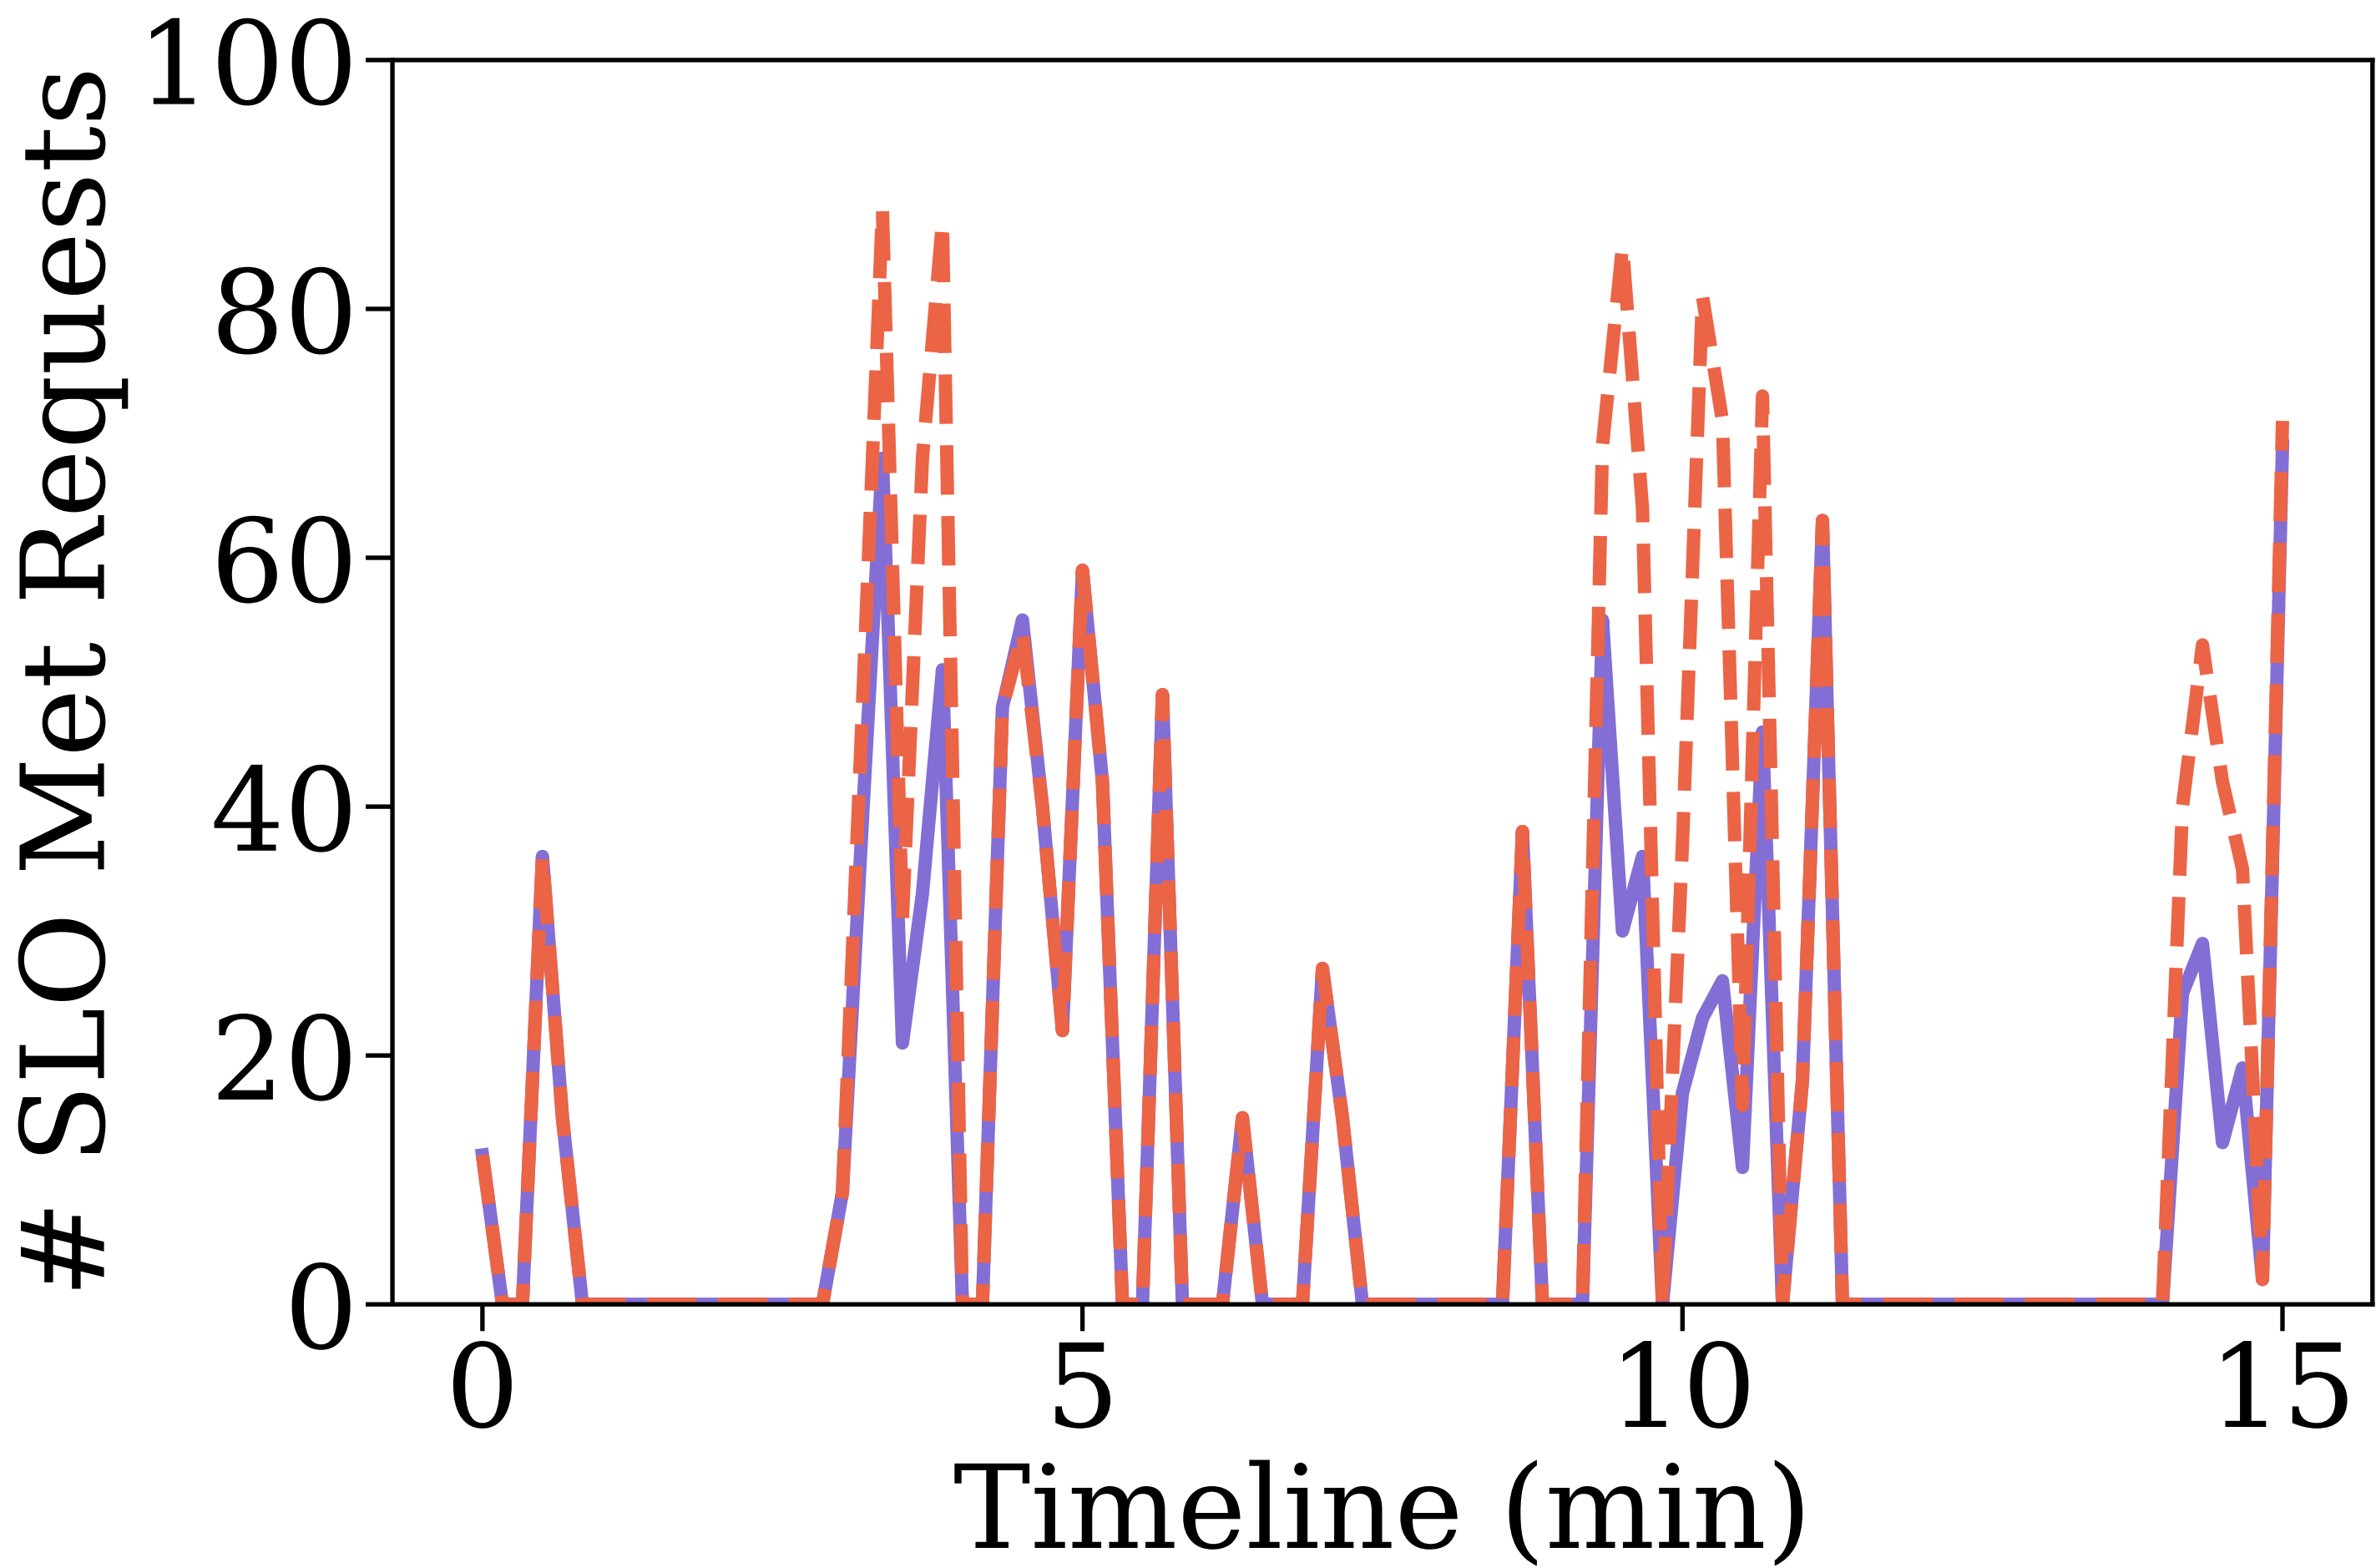

Supplement: supplementary_material [file r1_fcfs_mc_qps_inf.json_slo_met.pdf › scorpio/draw/llama8b-sharegpt/exp2_trace/r1_fcfs_mc_qps_inf.json_slo_met.pdf]

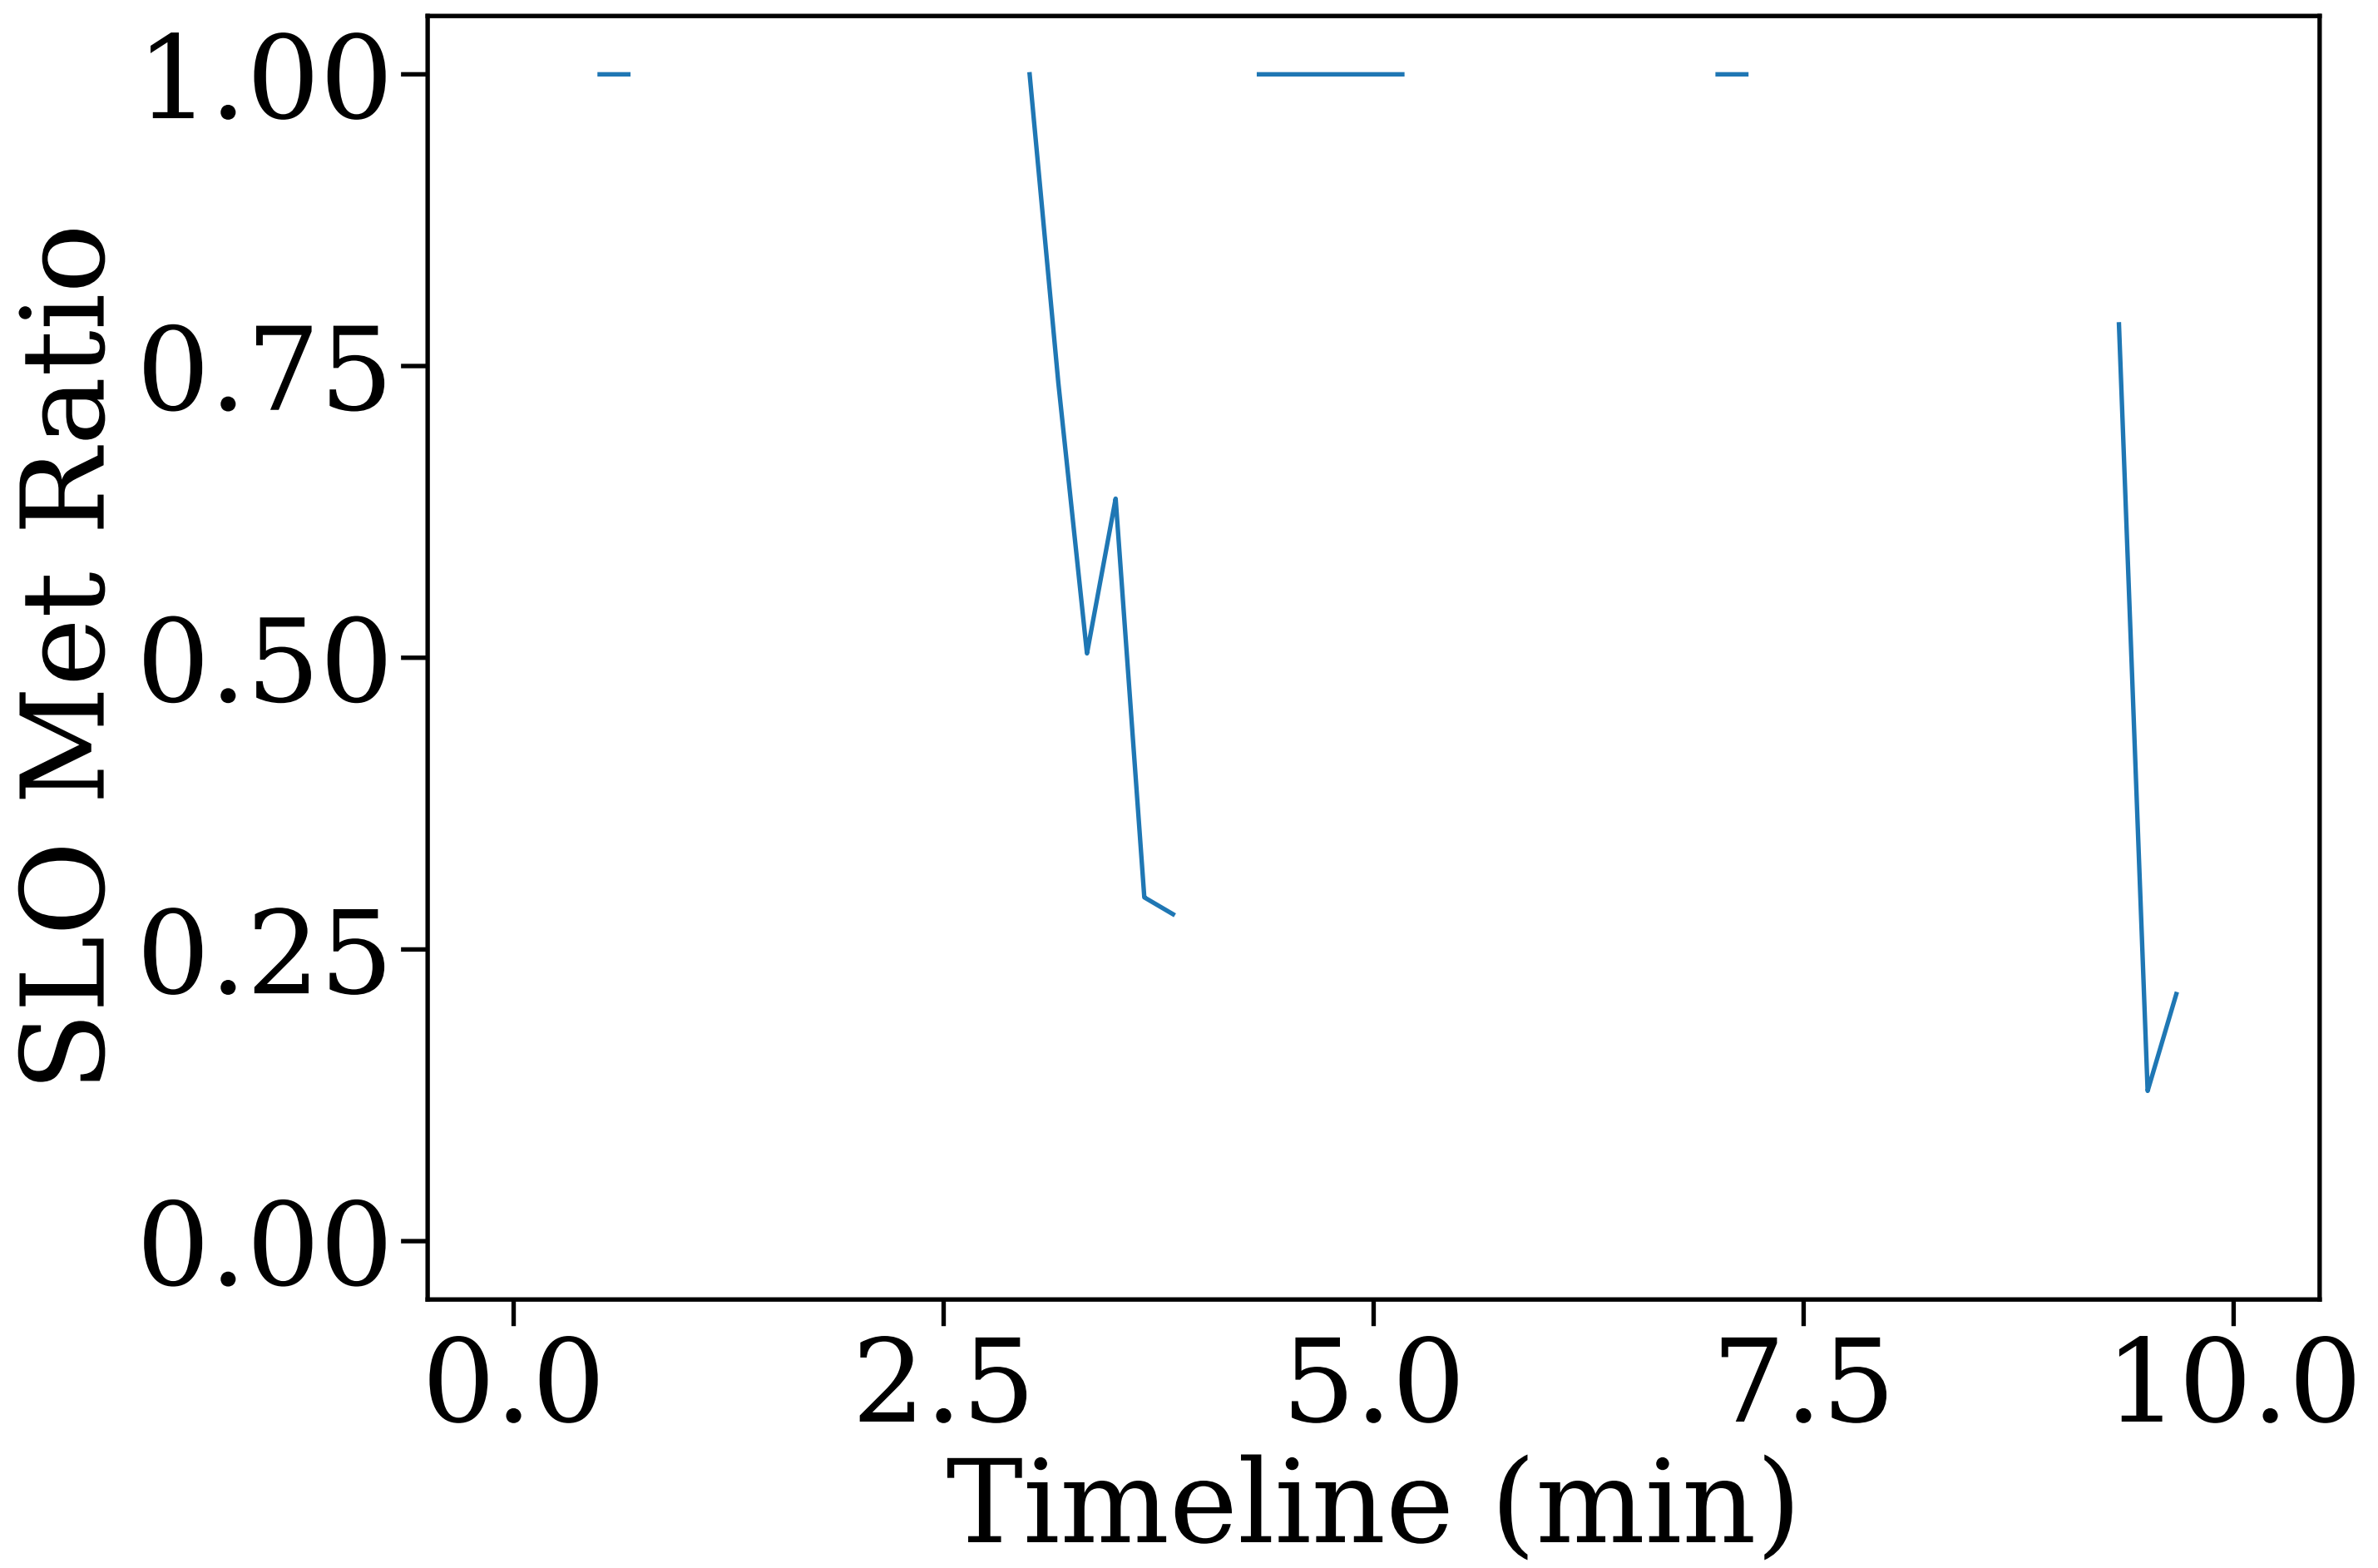

Supplement: supplementary_material [file r1_fcfs_mc_qps_inf.json_slo_met_ratio.pdf › scorpio/draw/llama8b-sharegpt/exp2_trace/r1_fcfs_mc_qps_inf.json_slo_met_ratio.pdf]

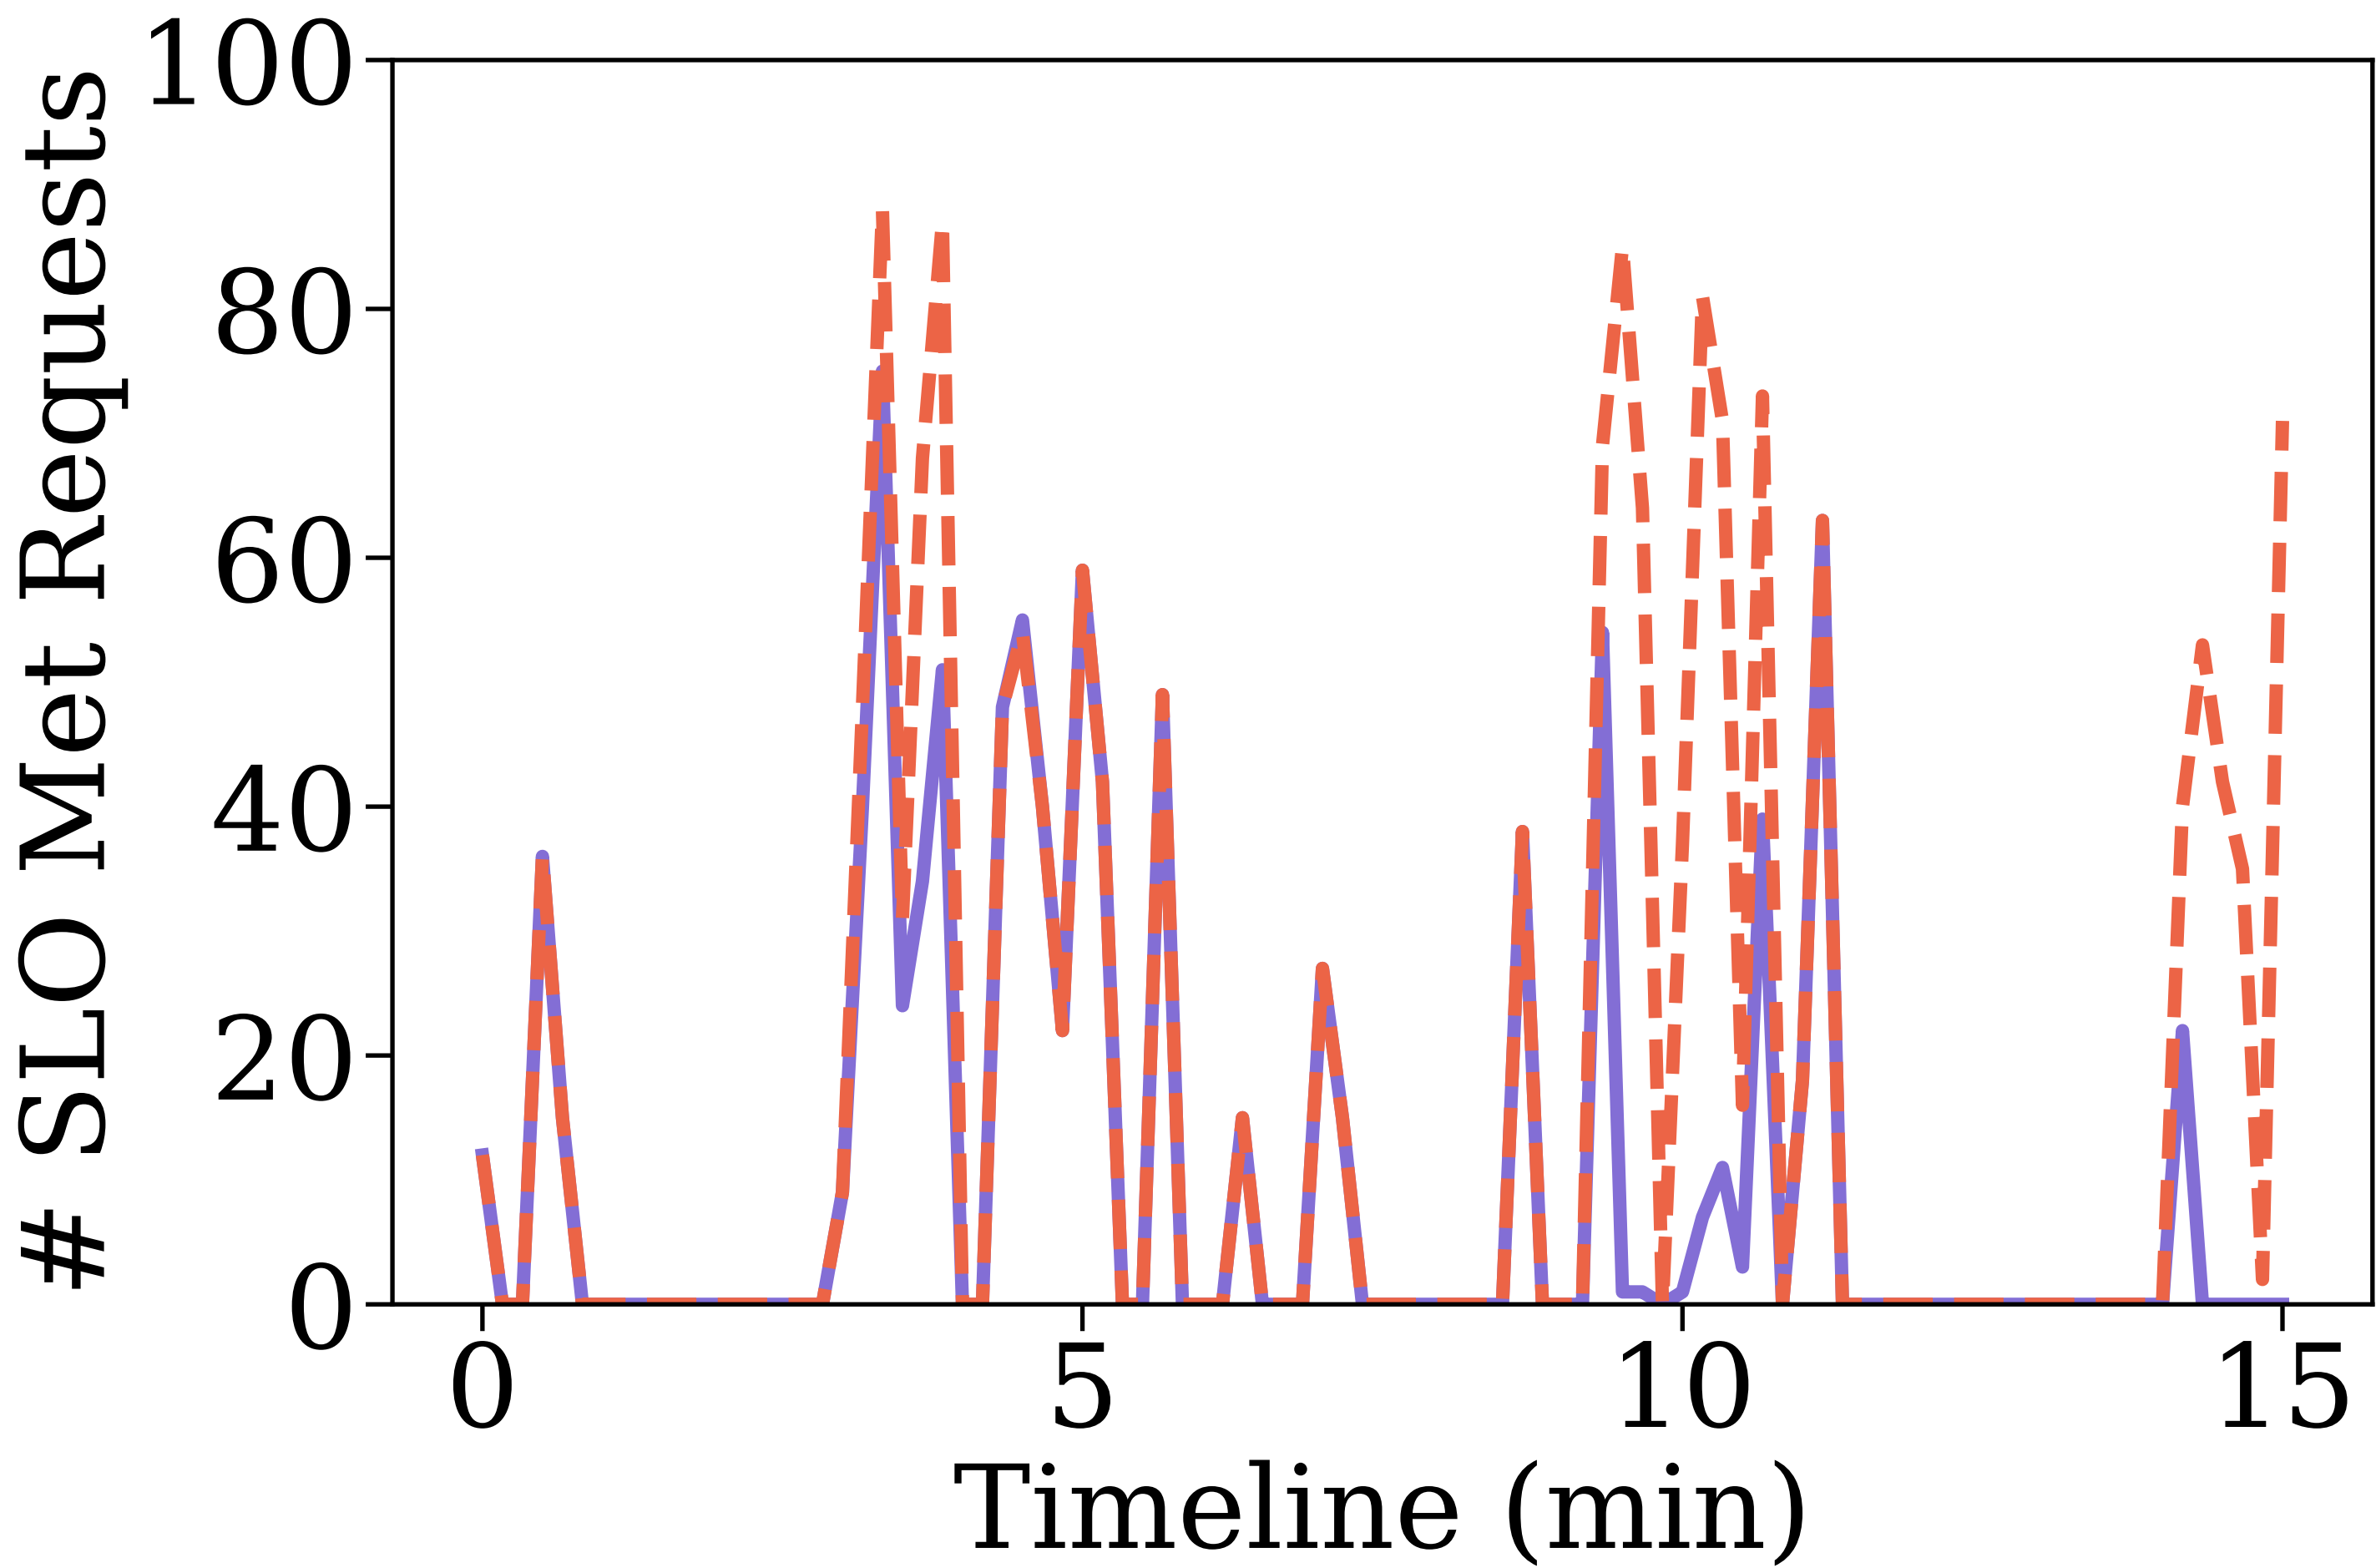

Supplement: supplementary_material [file r1_fcfs_qps_inf.json_slo_met.pdf › scorpio/draw/llama8b-sharegpt/exp2_trace/r1_fcfs_qps_inf.json_slo_met.pdf]

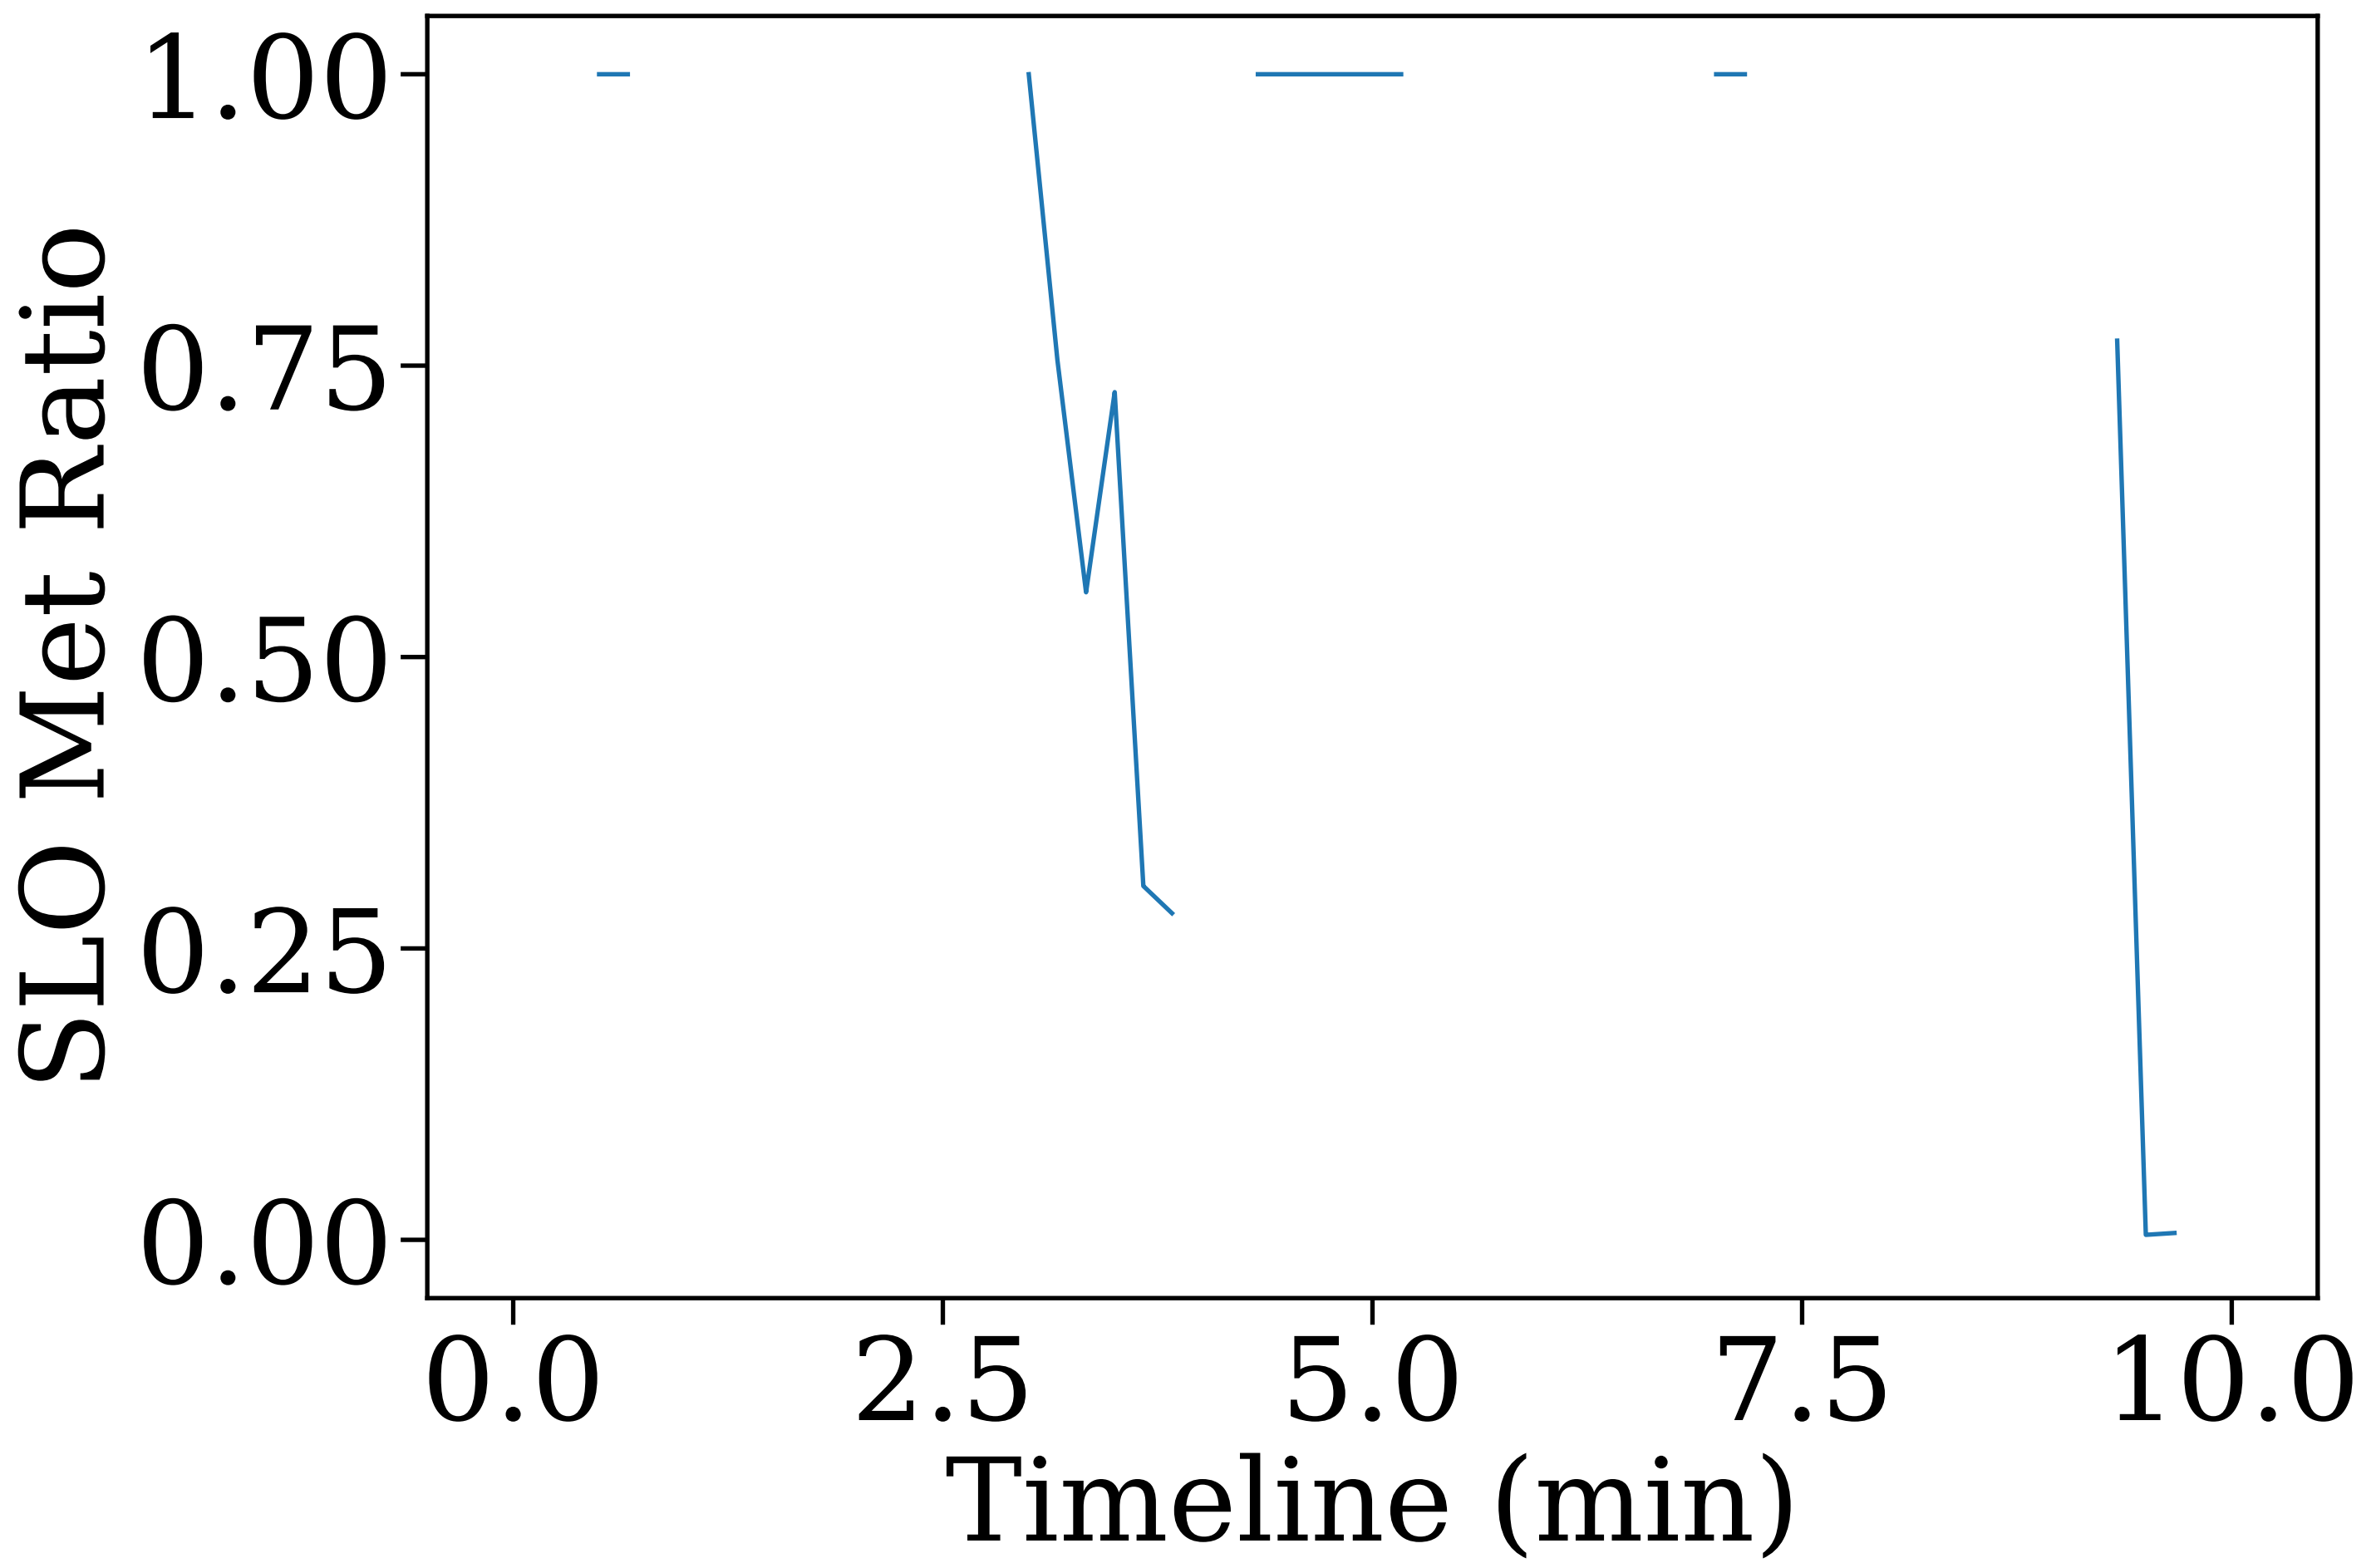

Supplement: supplementary_material [file r1_fcfs_qps_inf.json_slo_met_ratio.pdf › scorpio/draw/llama8b-sharegpt/exp2_trace/r1_fcfs_qps_inf.json_slo_met_ratio.pdf]

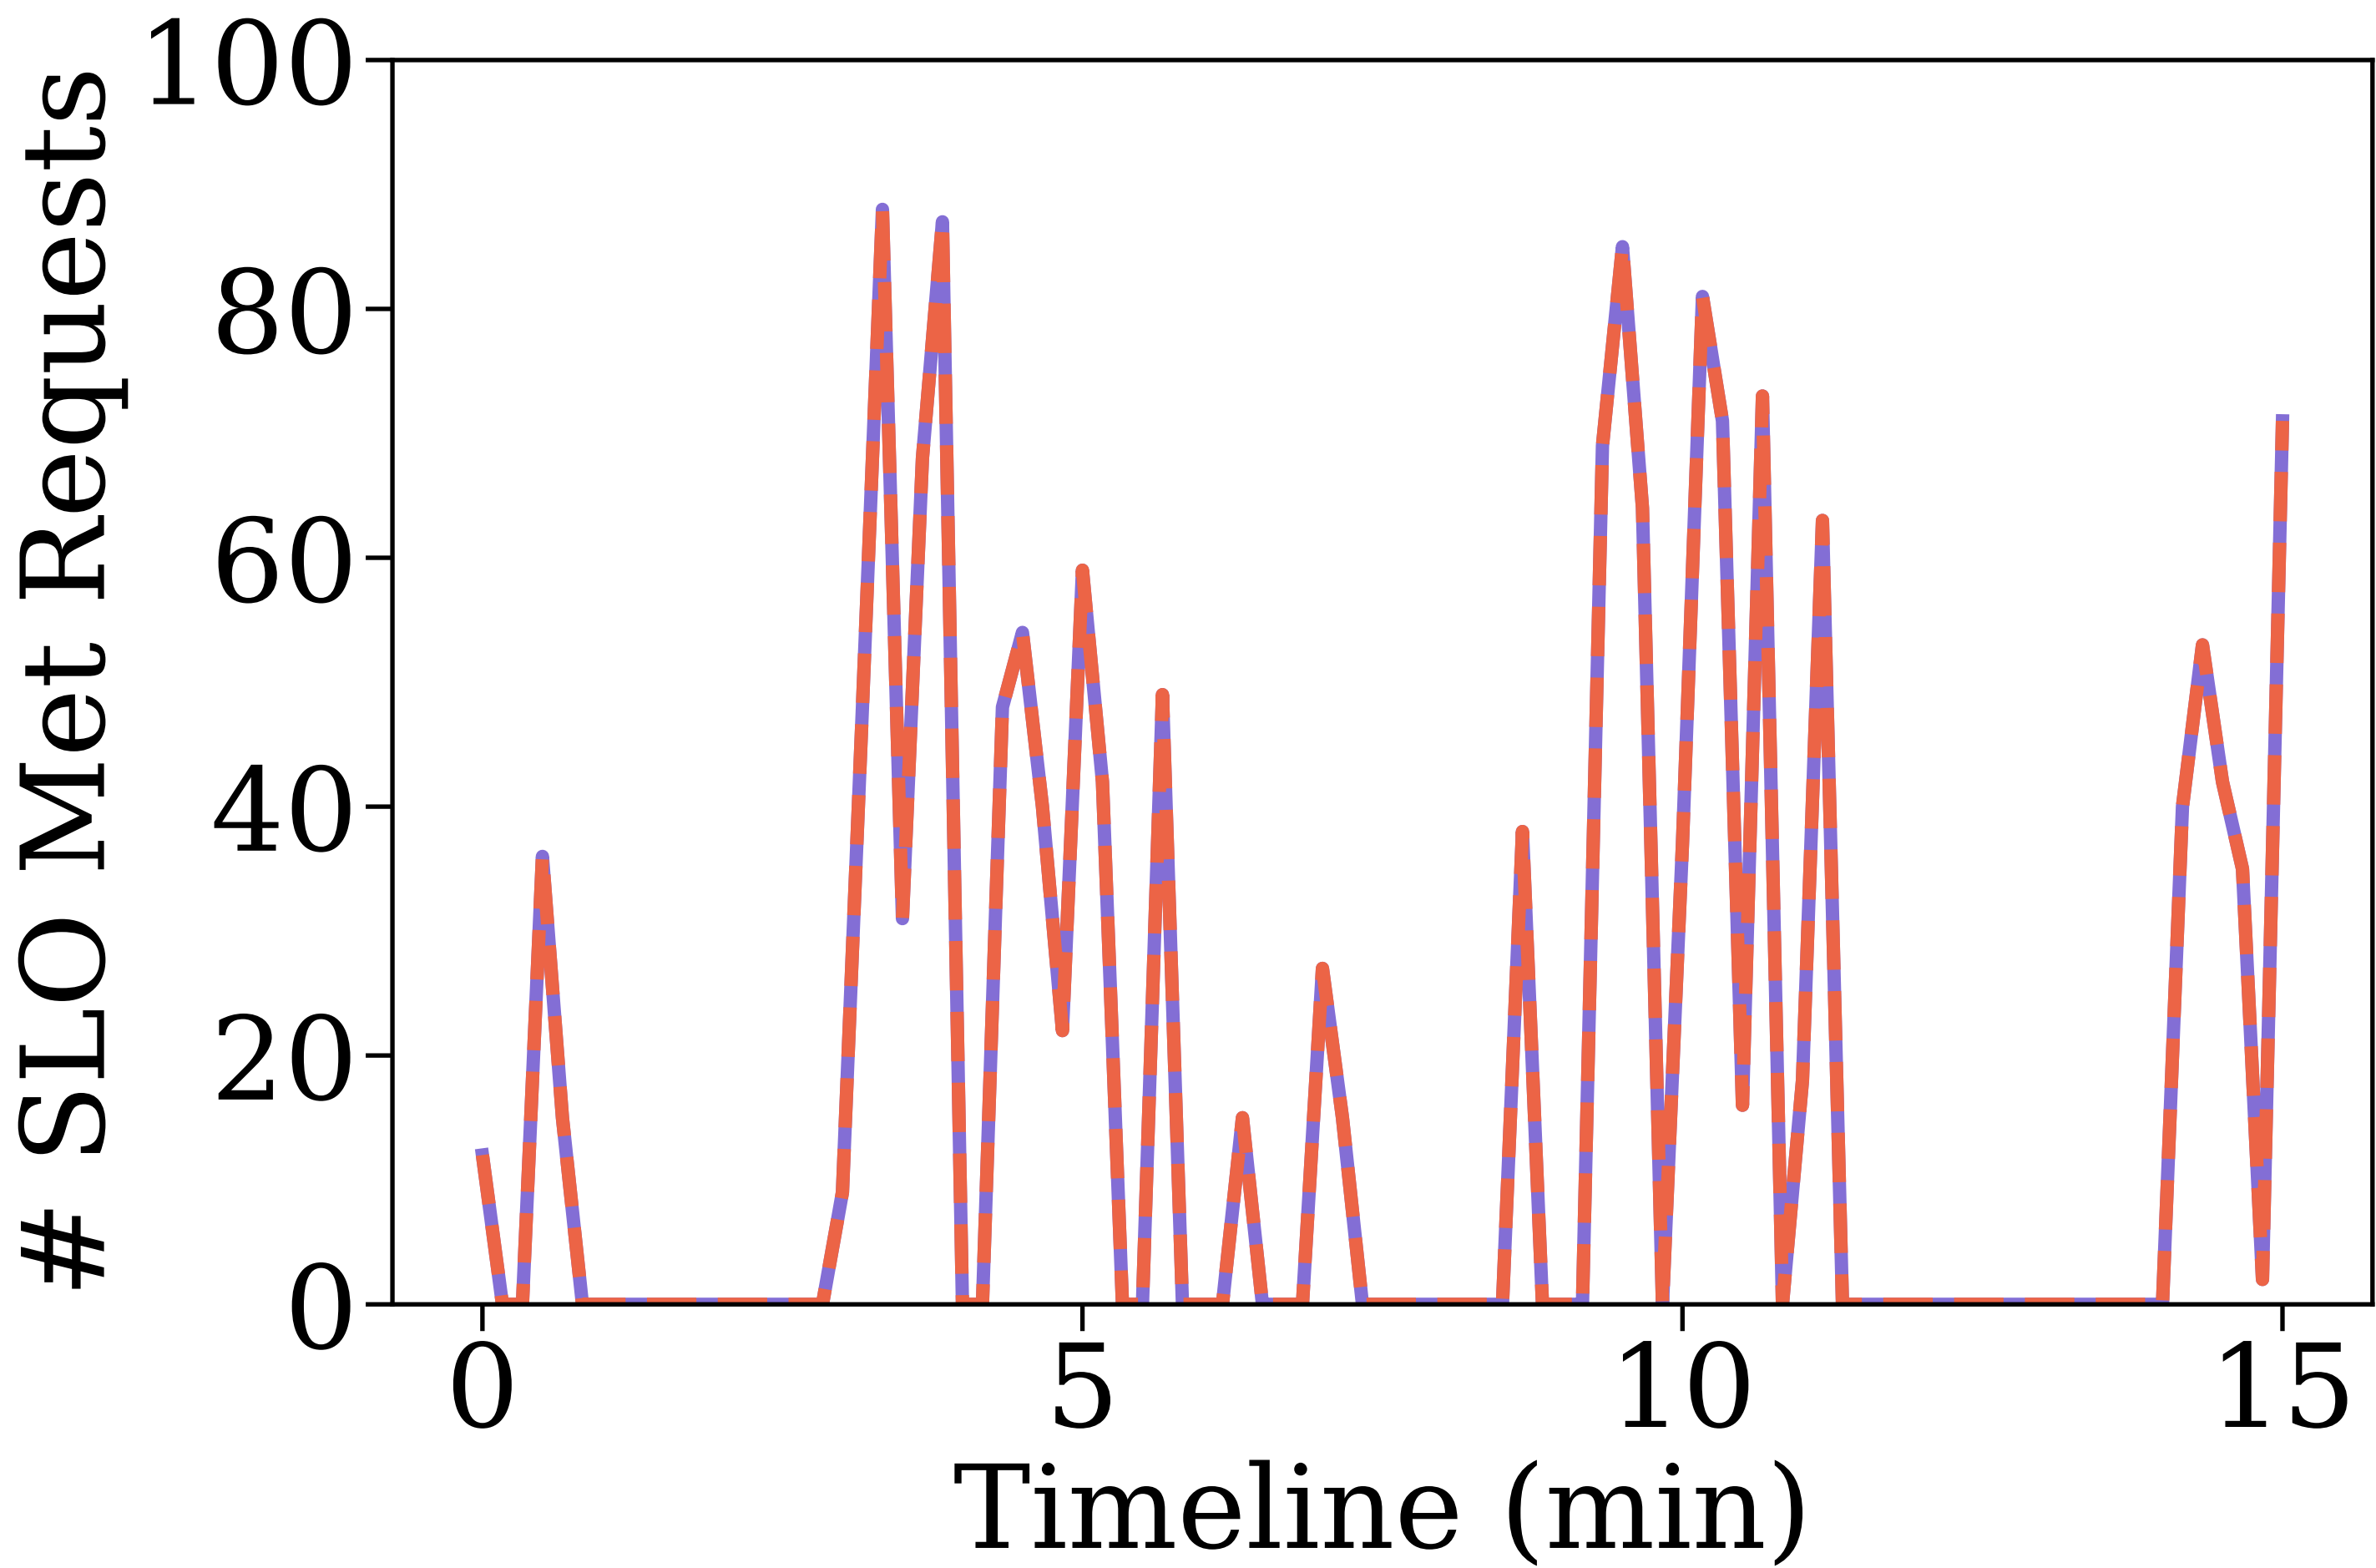

Supplement: supplementary_material [file r1_ldf_rej_gate1.3_credit_qps_inf.json_slo_met.pdf › scorpio/draw/llama8b-sharegpt/exp2_trace/r1_ldf_rej_gate1.3_credit_qps_inf.json_slo_met.pdf]

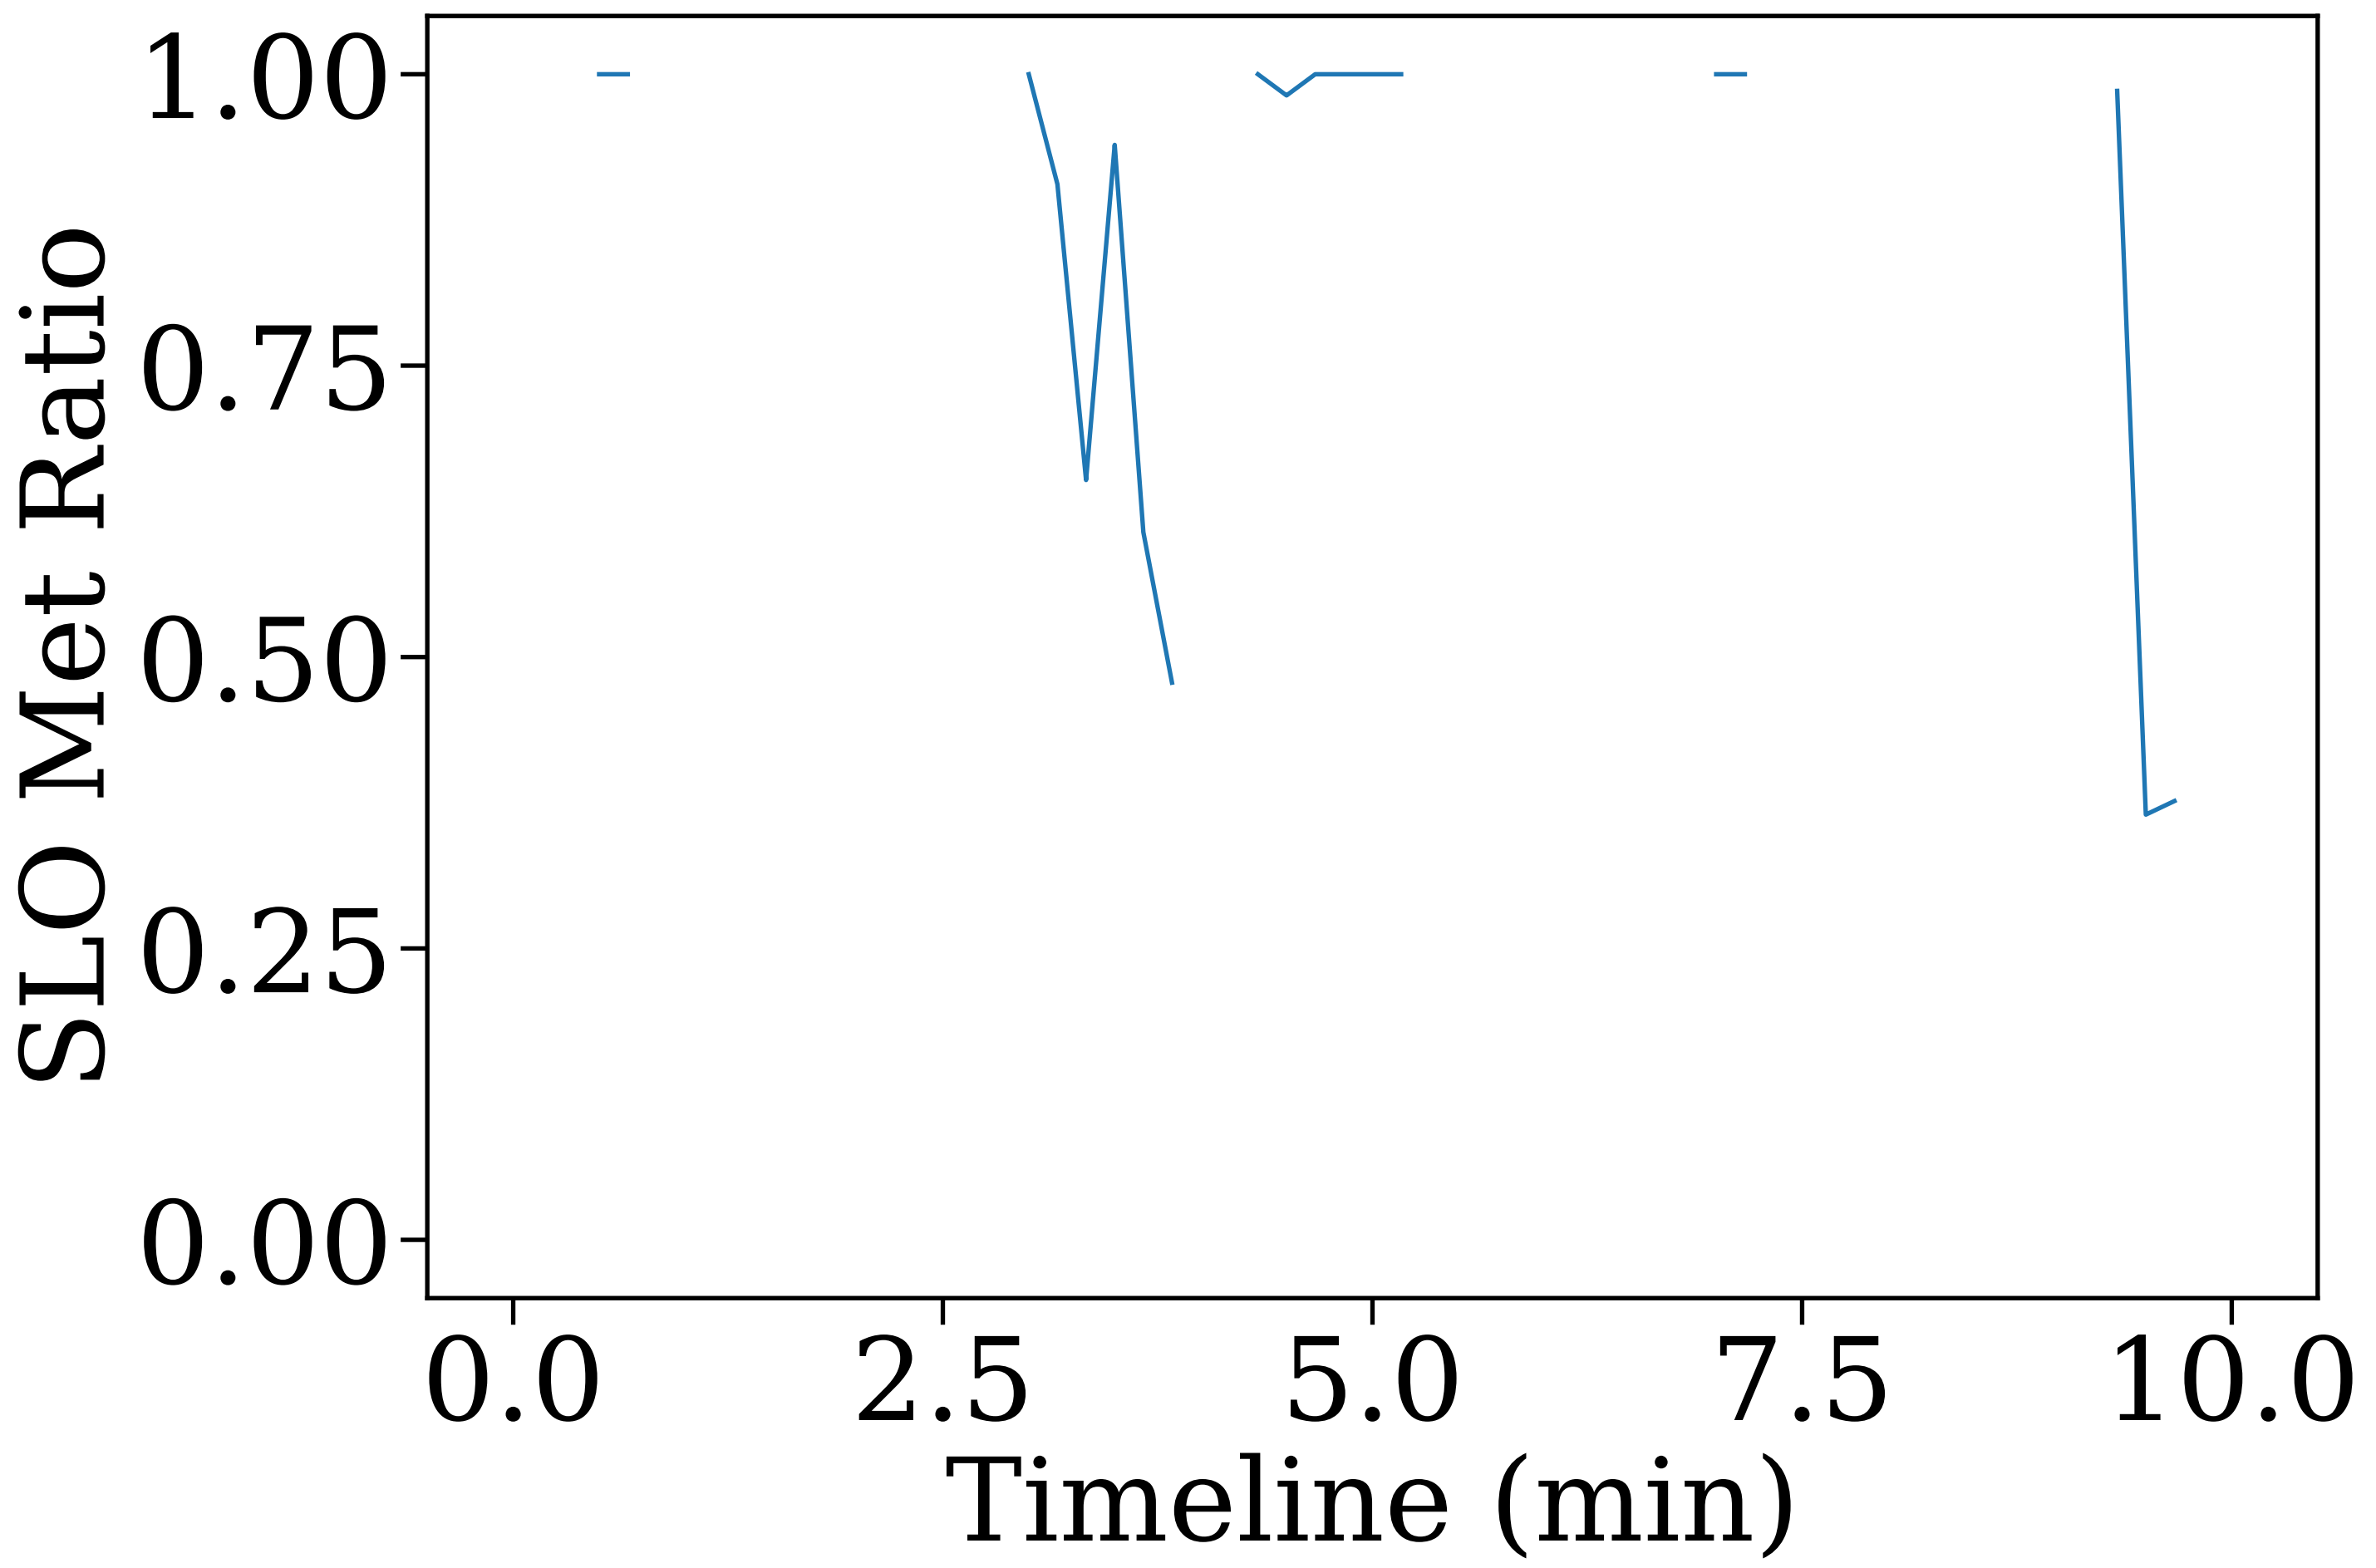

Supplement: supplementary_material [file r1_ldf_rej_gate1.3_credit_qps_inf.json_slo_met_ratio.pdf › scorpio/draw/llama8b-sharegpt/exp2_trace/r1_ldf_rej_gate1.3_credit_qps_inf.json_slo_met_ratio.pdf]

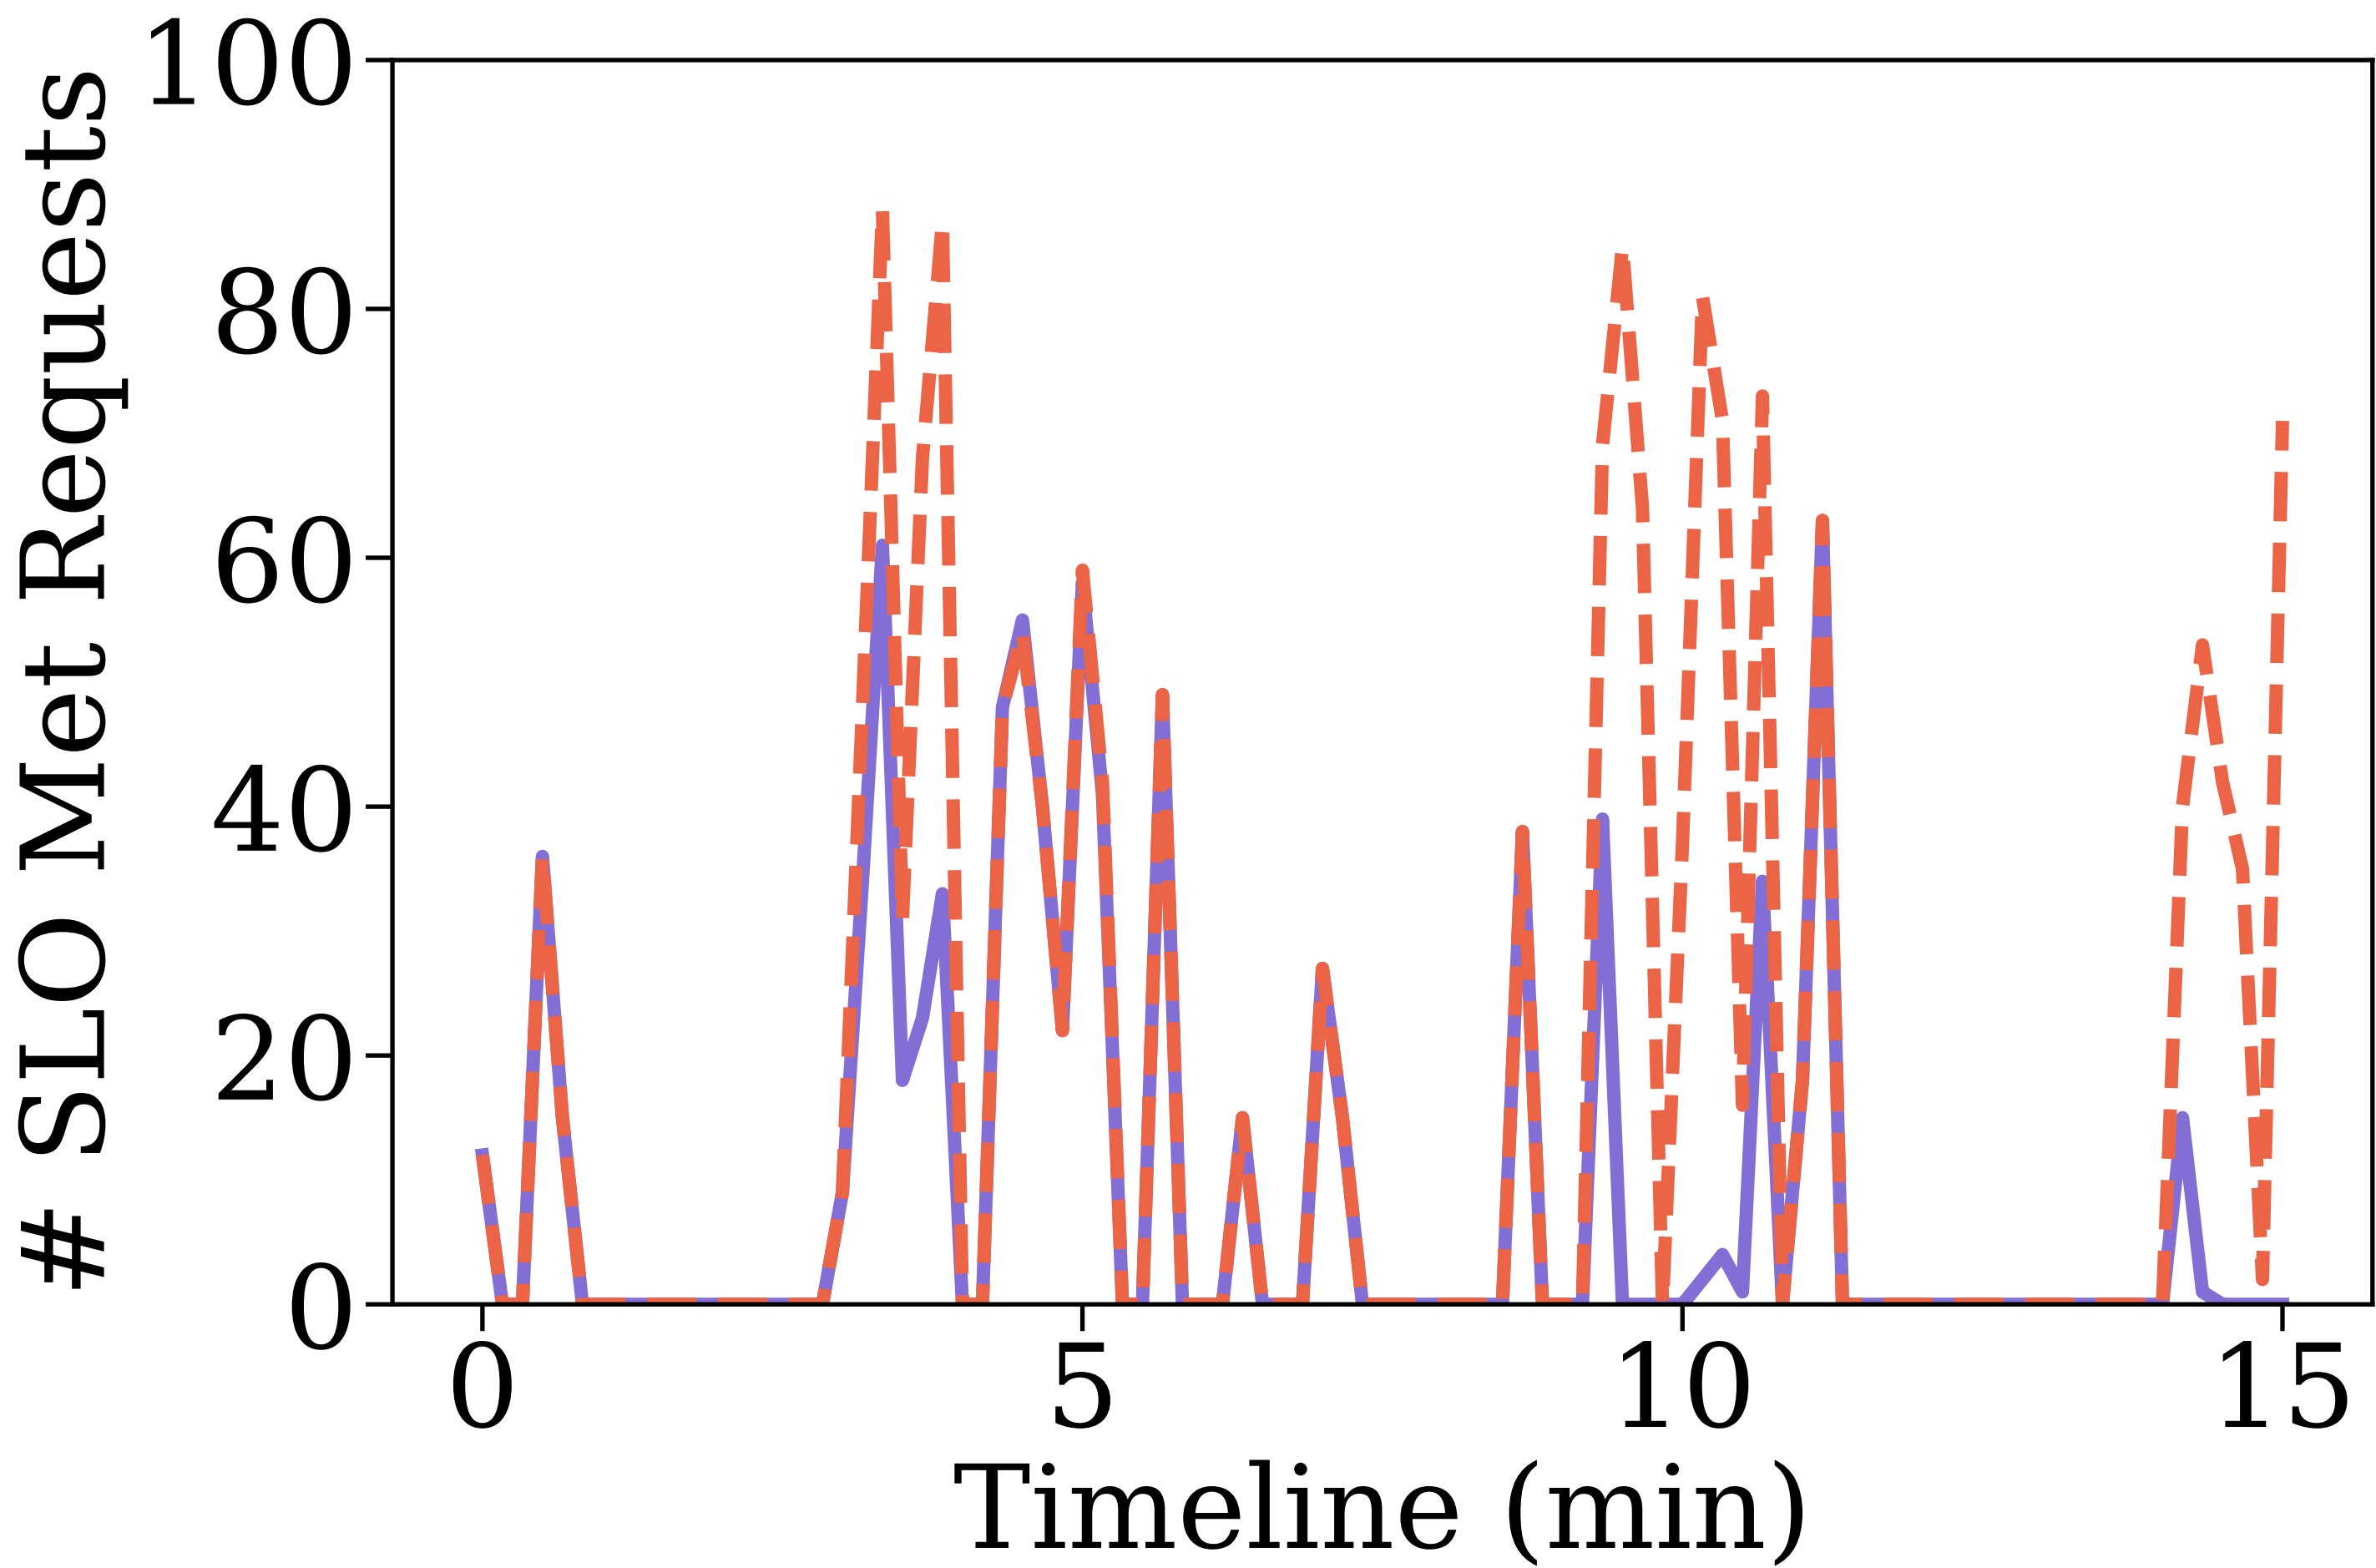

Supplement: supplementary_material [file r1_ssjf_pred_qps_inf.json_slo_met.pdf › scorpio/draw/llama8b-sharegpt/exp2_trace/r1_ssjf_pred_qps_inf.json_slo_met.pdf]

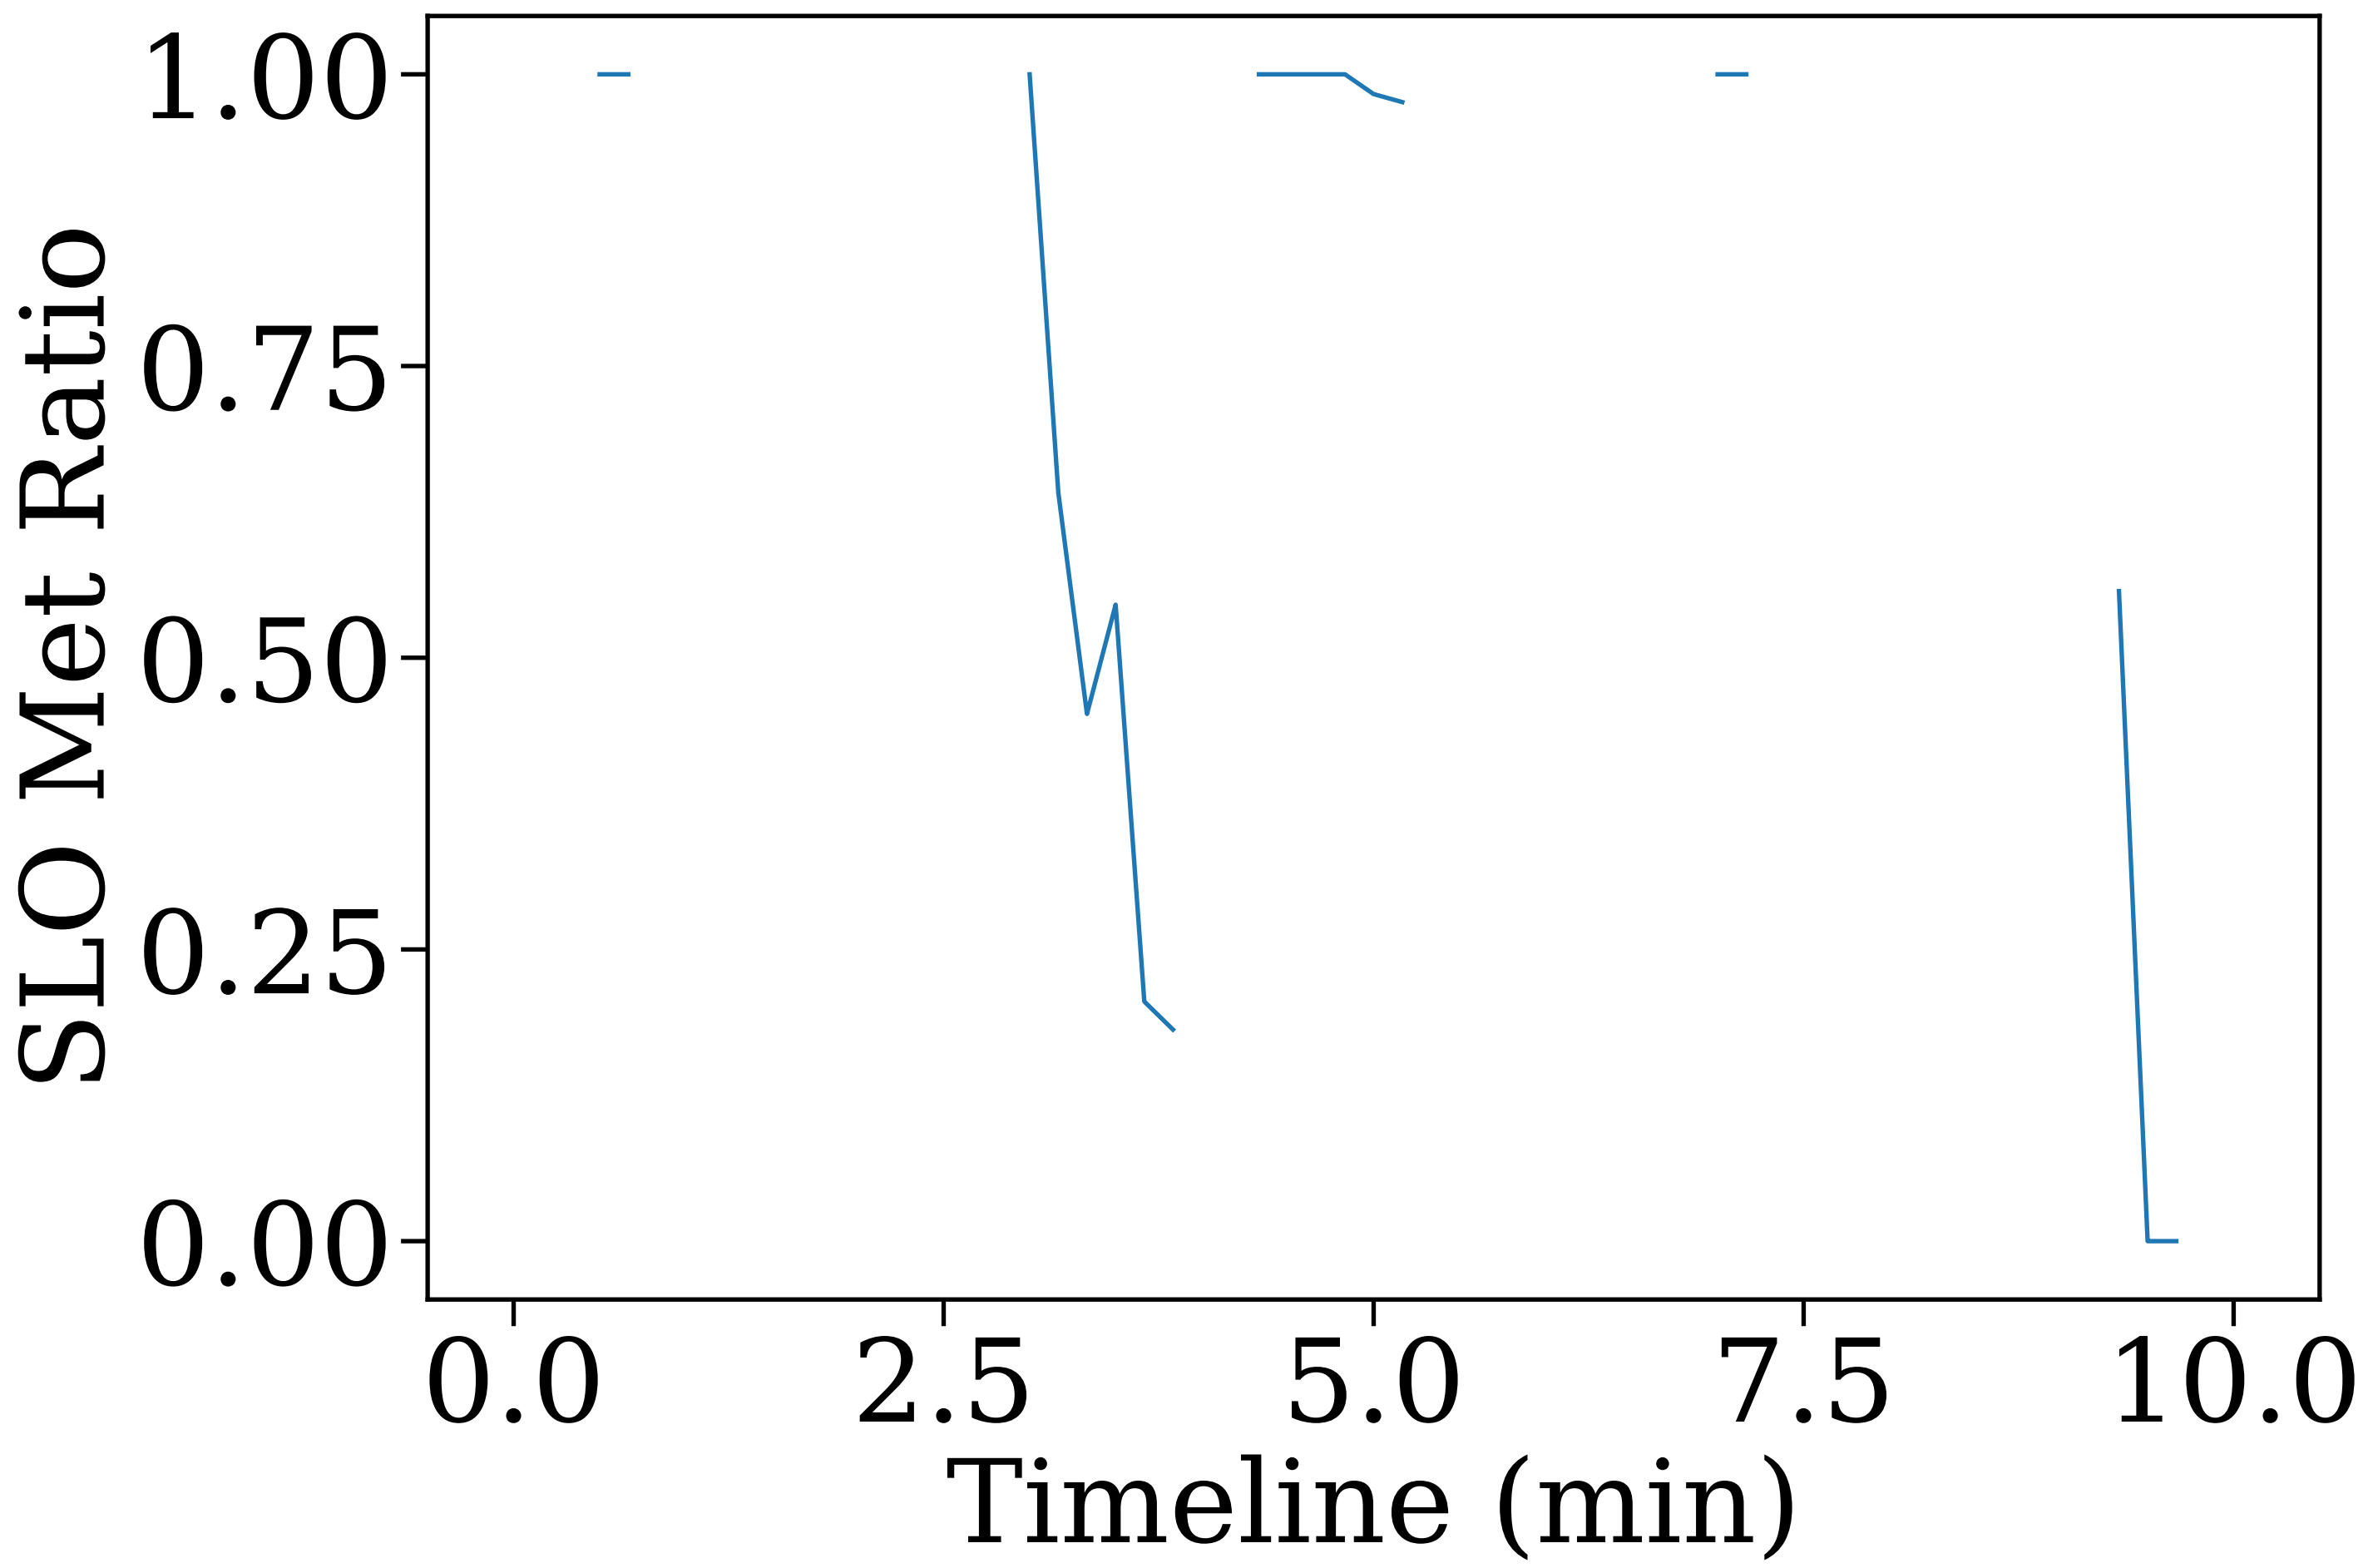

Supplement: supplementary_material [file r1_ssjf_pred_qps_inf.json_slo_met_ratio.pdf › scorpio/draw/llama8b-sharegpt/exp2_trace/r1_ssjf_pred_qps_inf.json_slo_met_ratio.pdf]

 Scorpio(Ours)     vLLM     Mooncake     S3

Supplement: supplementary_material [file slo_goodput_legend.pdf › scorpio/draw/llama8b-sharegpt/exp2_trace/slo_goodput_legend.pdf]

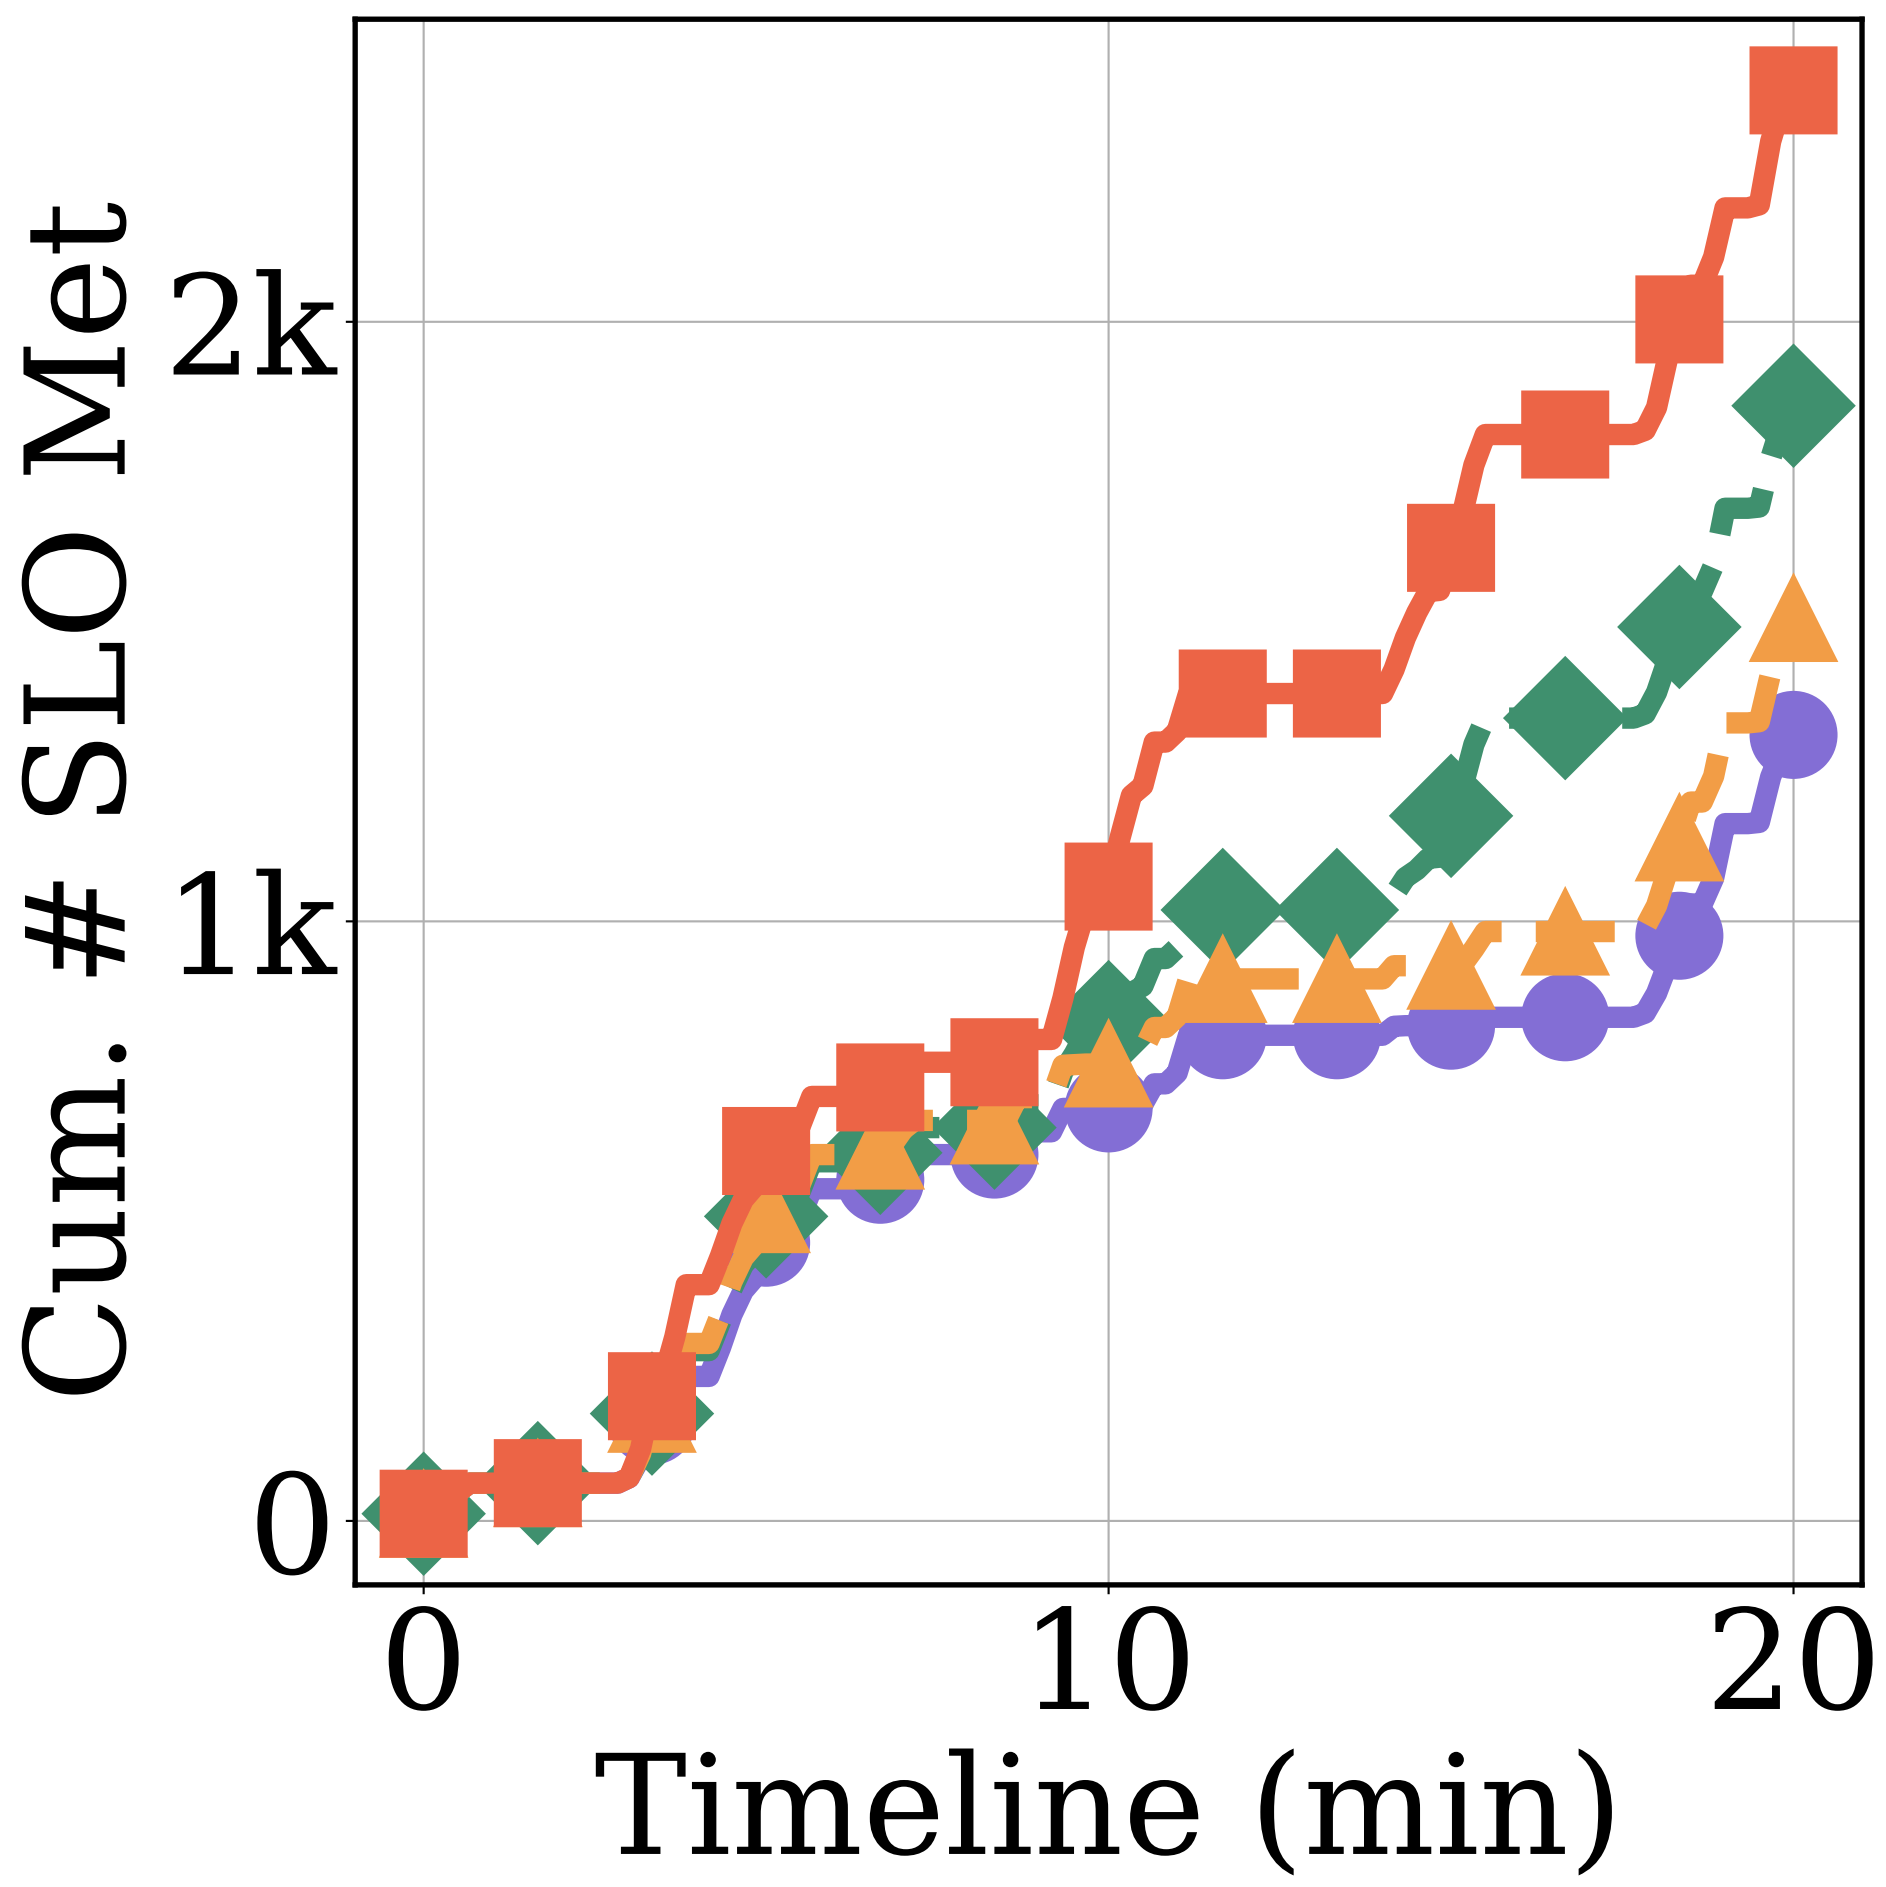

Supplement: supplementary_material [file slo_met_over_time_cdf.pdf › scorpio/draw/llama8b-sharegpt/exp2_trace/slo_met_over_time_cdf.pdf]

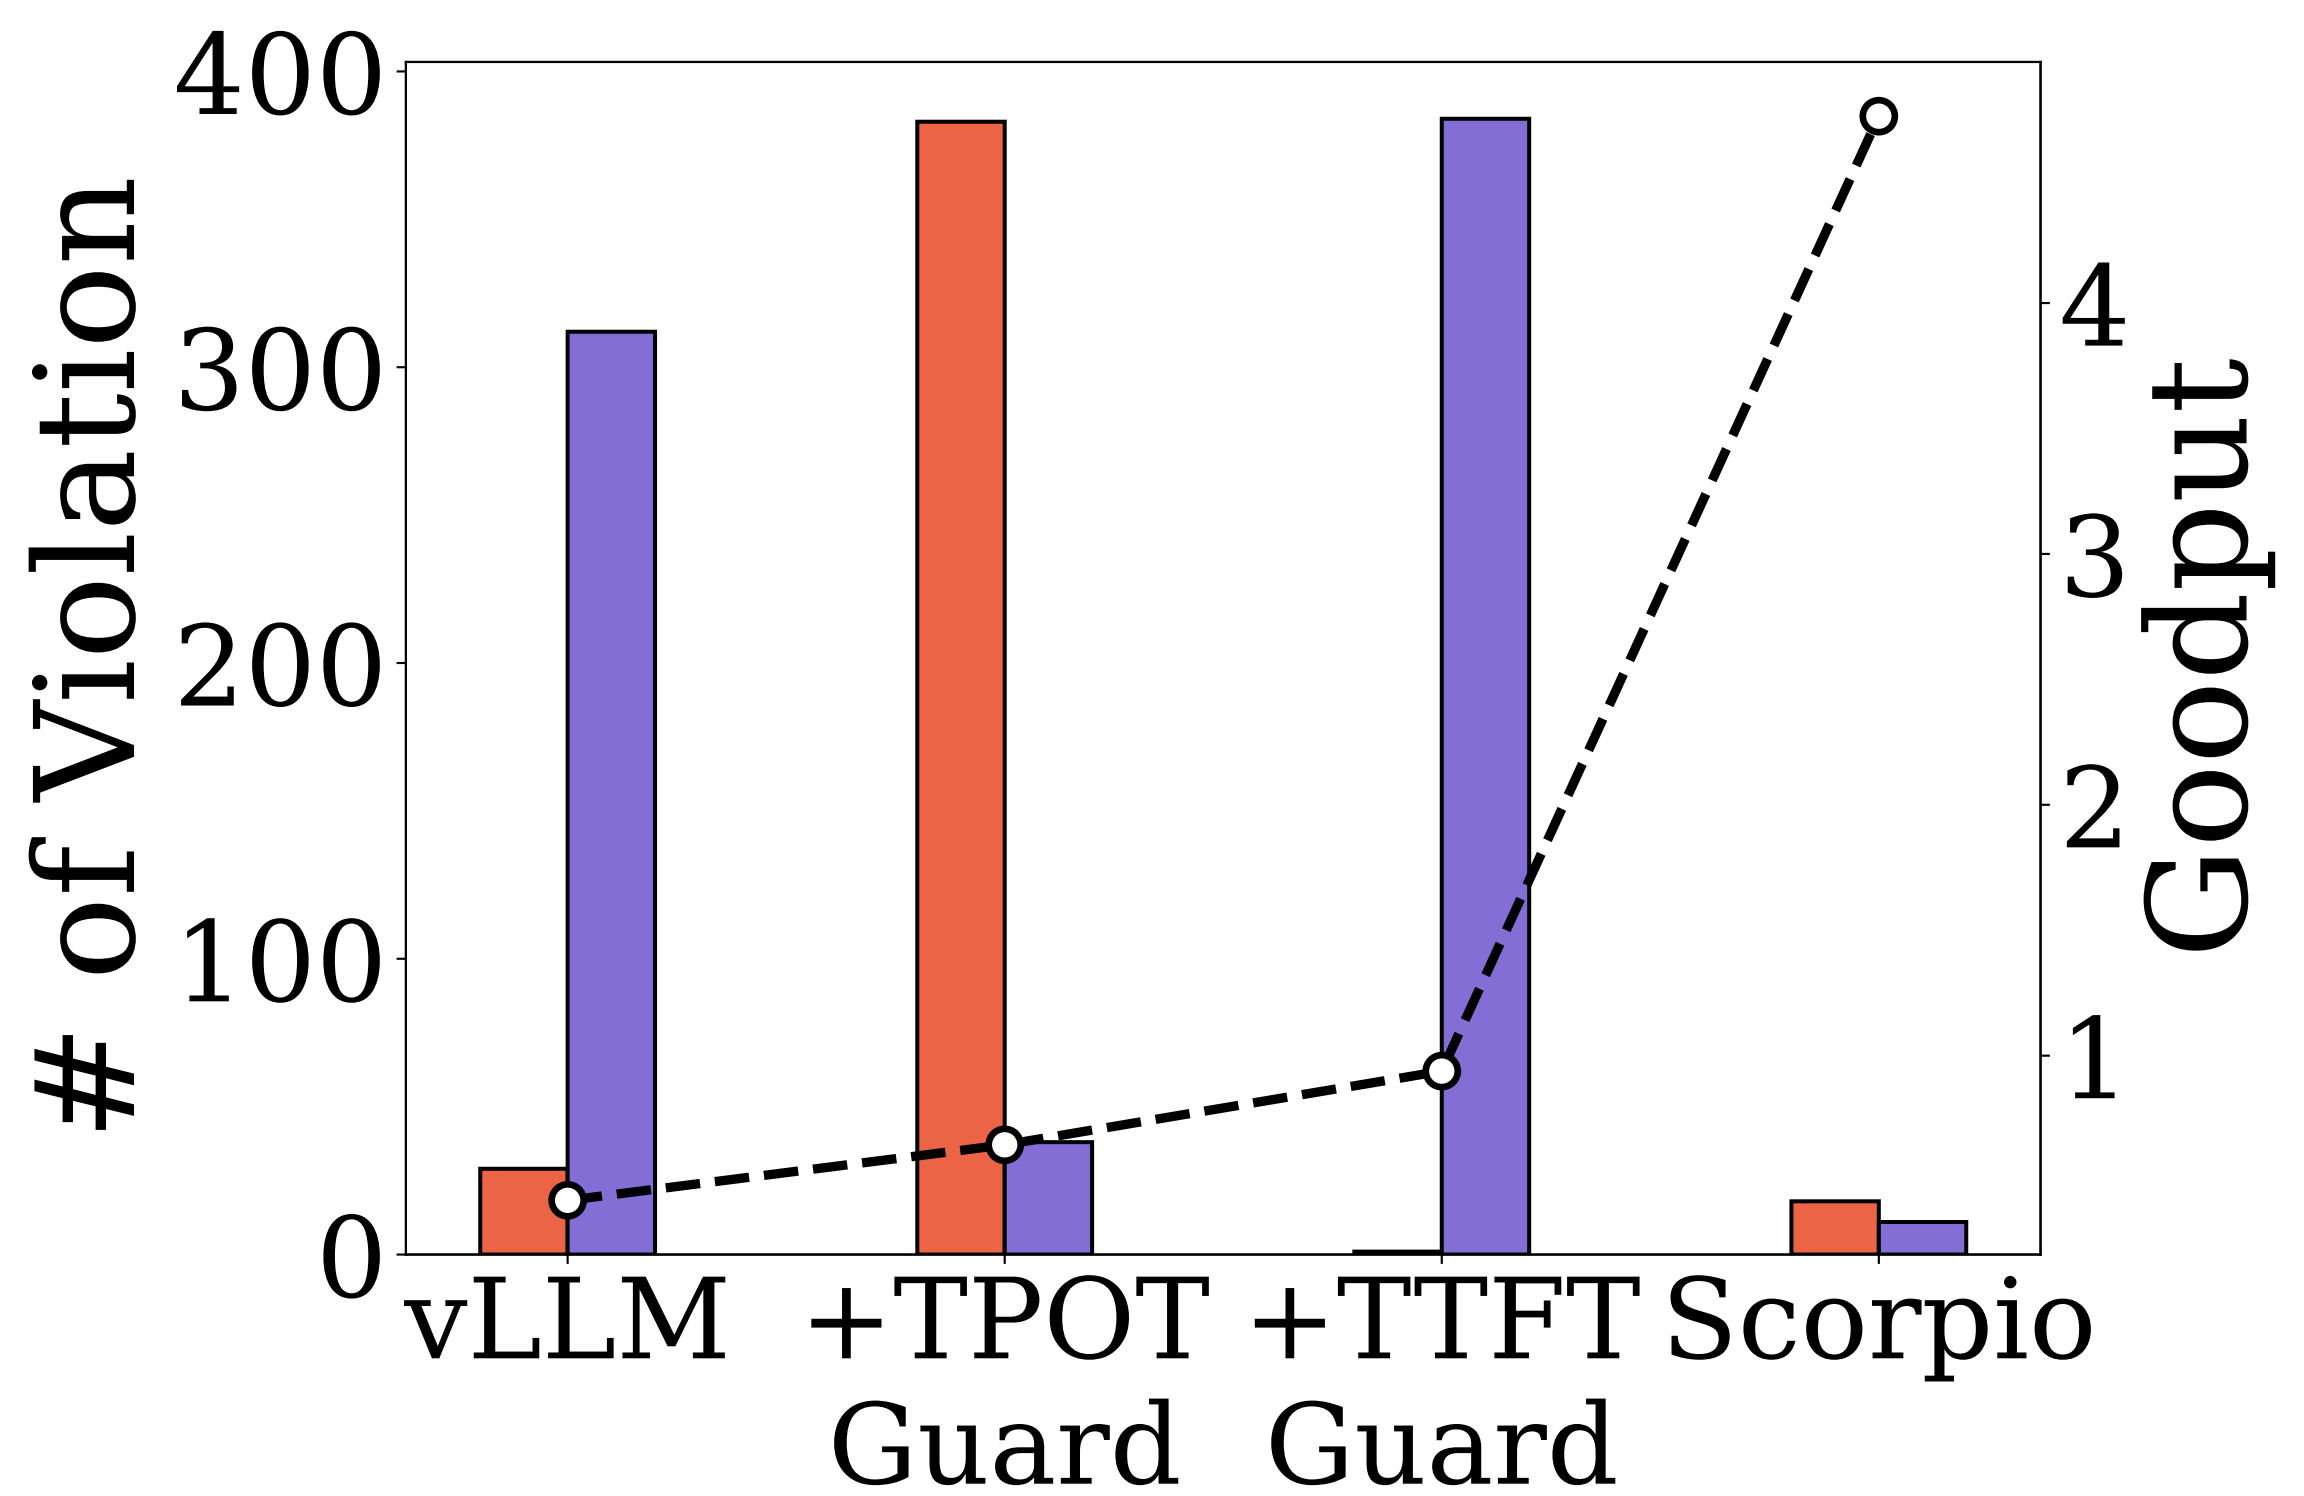

Supplement: supplementary_material [file ablation.pdf › scorpio/draw/llama8b-sharegpt/exp3_ablation/ablation.pdf]

# Gemma-27B LMSYS

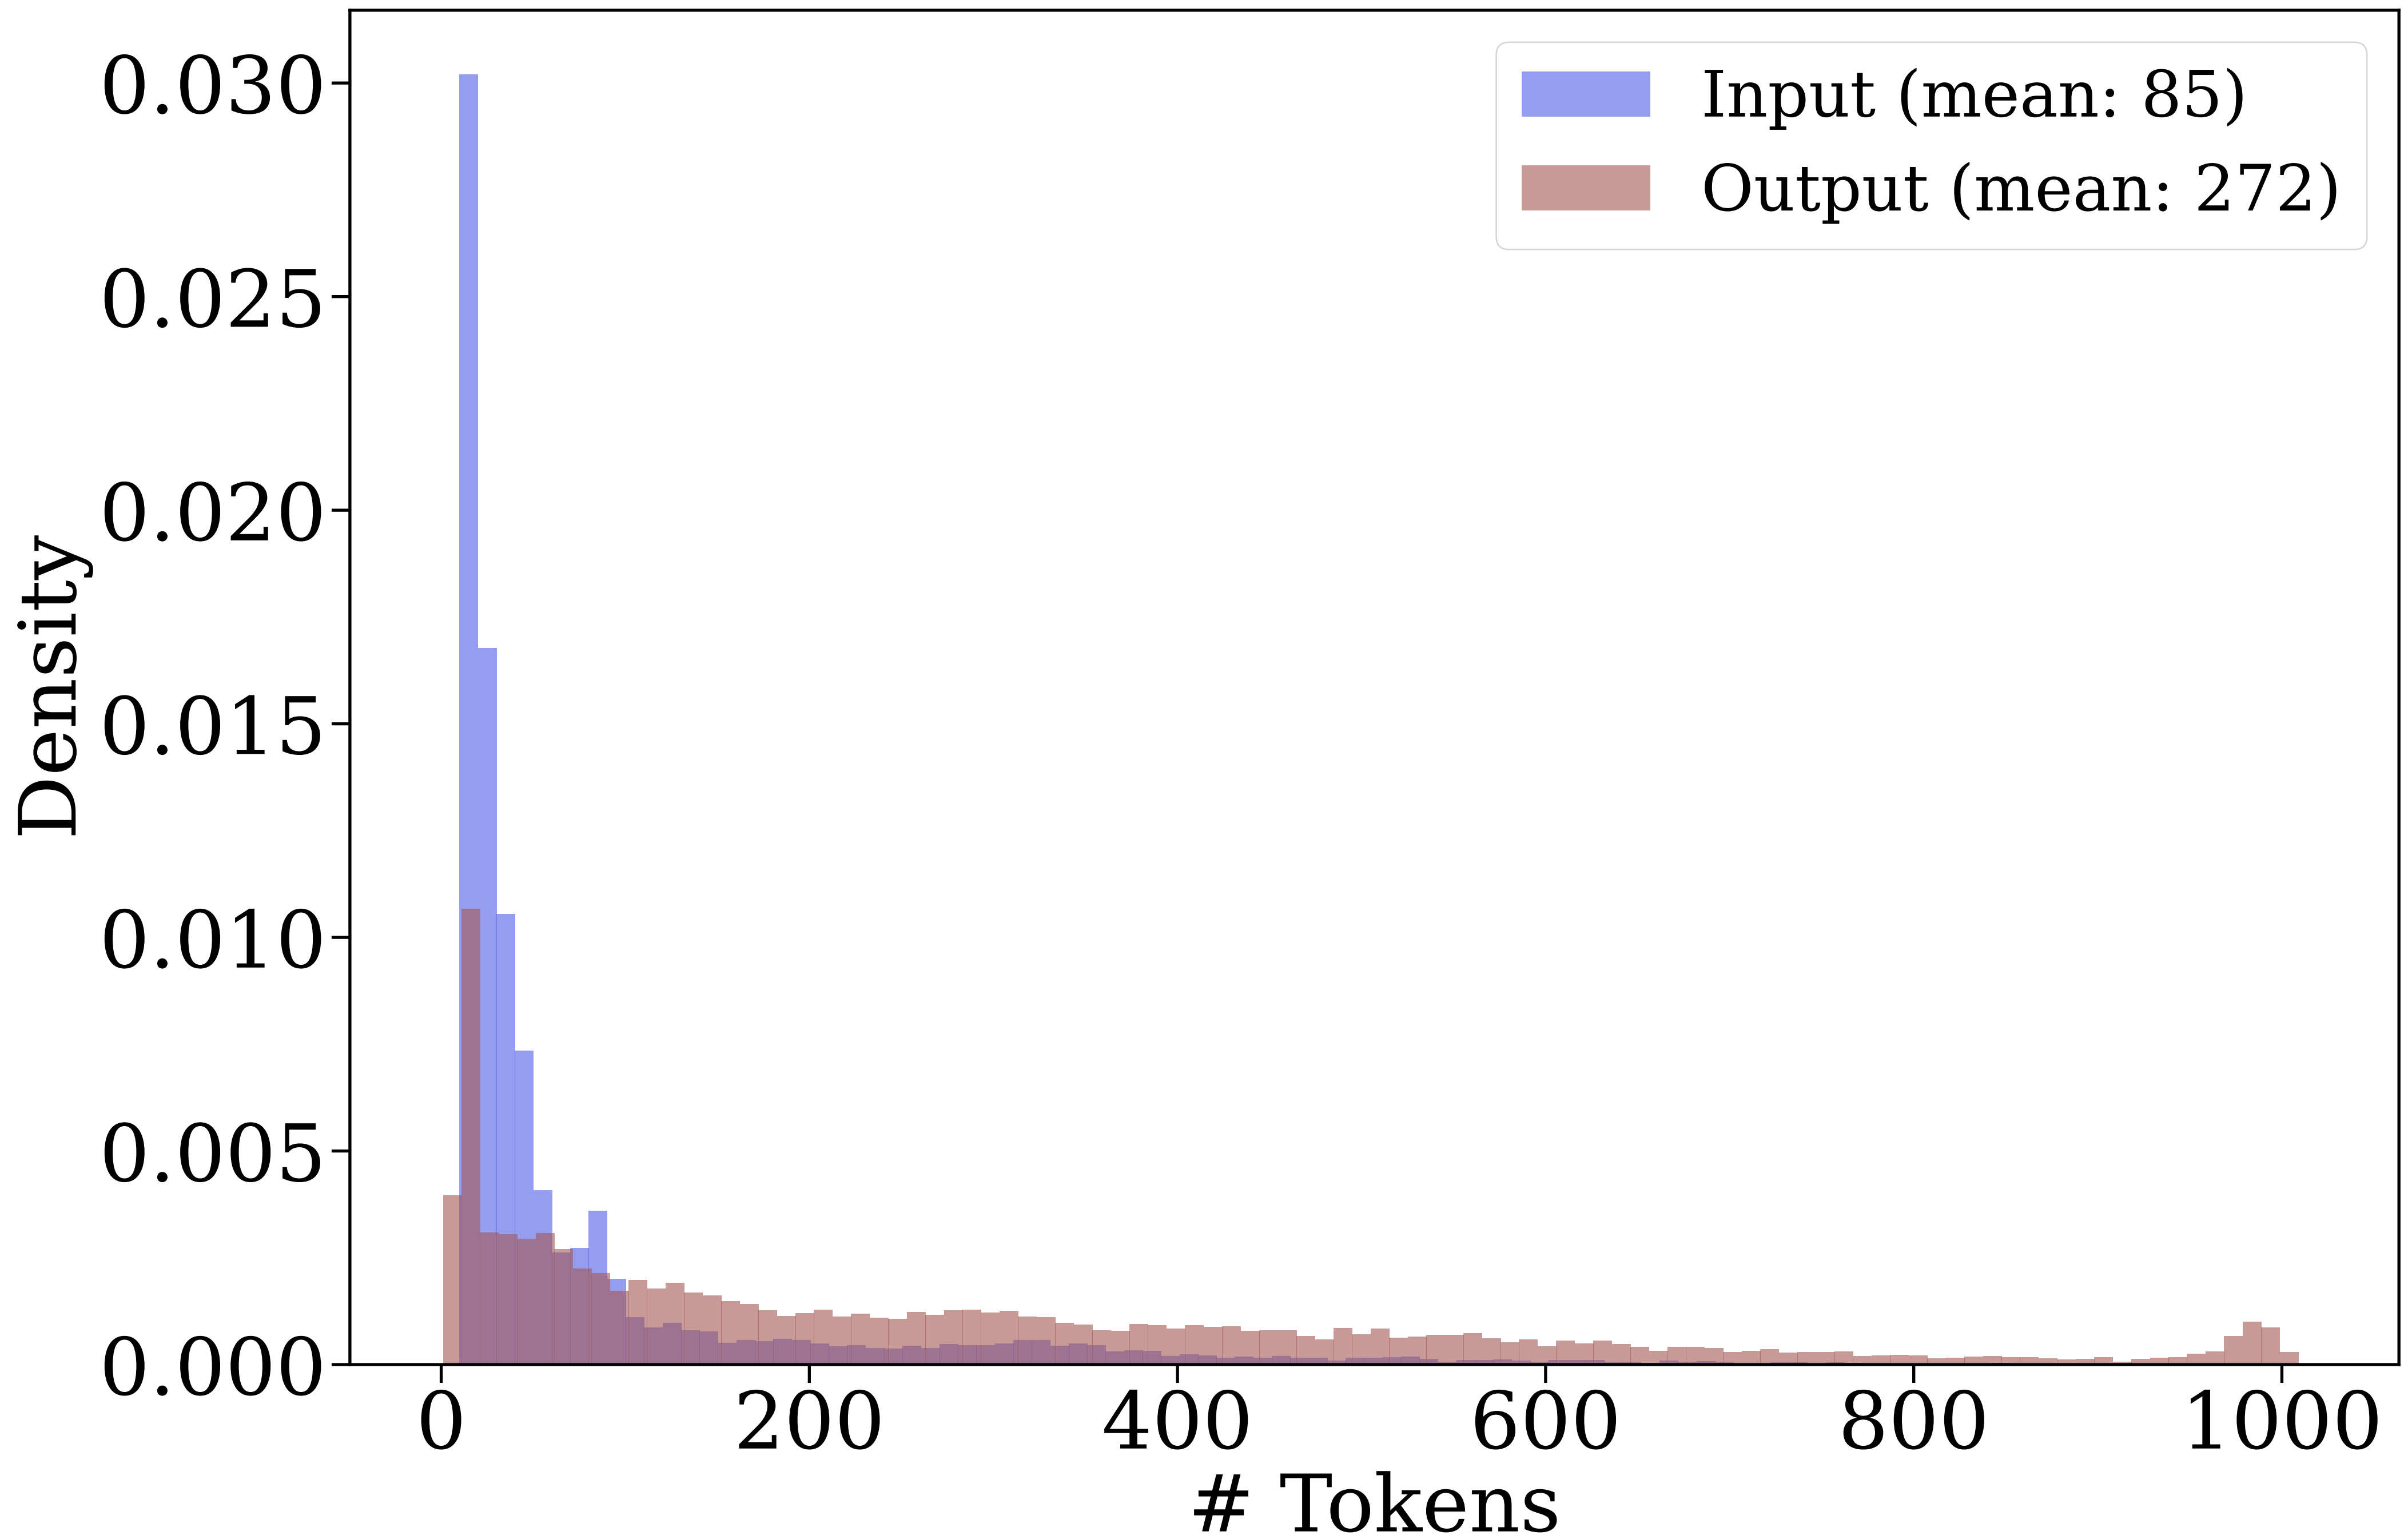

Supplement: supplementary_material [file gemma27b-lmsys-distribution.pdf › scorpio/draw/others/dataset_distribution/gemma27b-lmsys-distribution.pdf]

# Gemma-27B ShareGPT

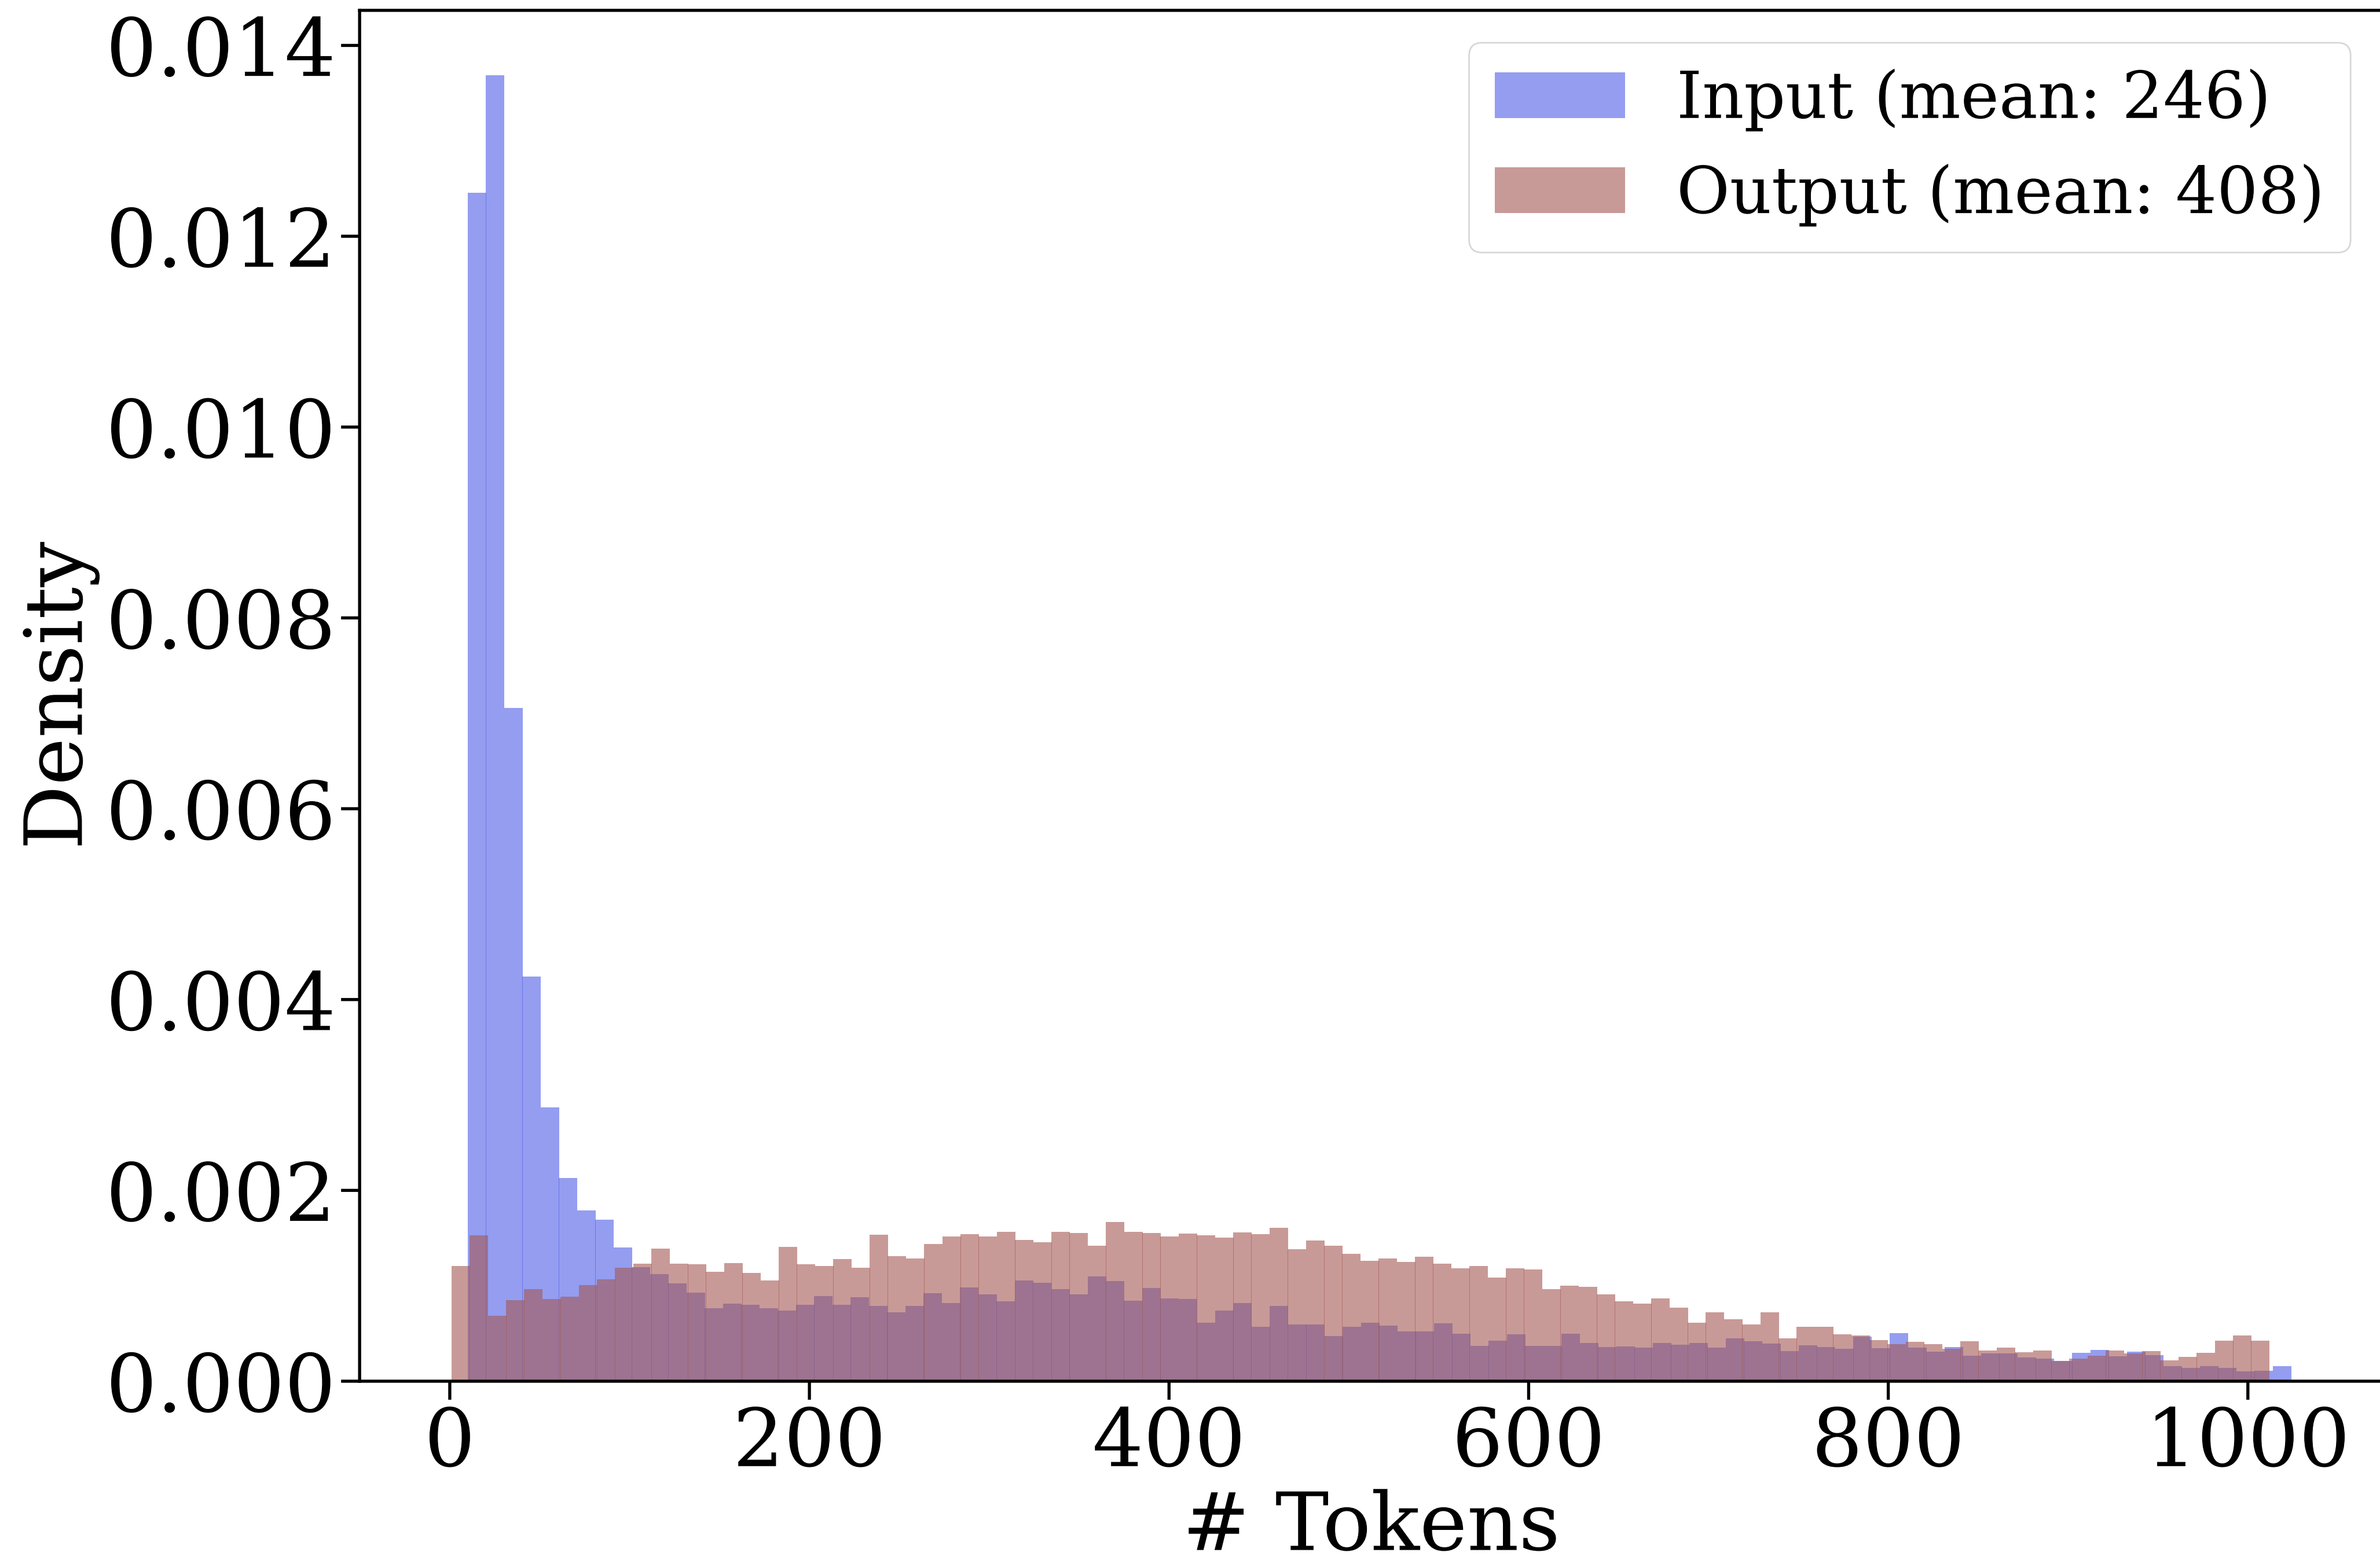

Supplement: supplementary_material [file gemma27b-sharegpt-distribution.pdf › scorpio/draw/others/dataset_distribution/gemma27b-sharegpt-distribution.pdf]

# LLaMA-8B LMSYS

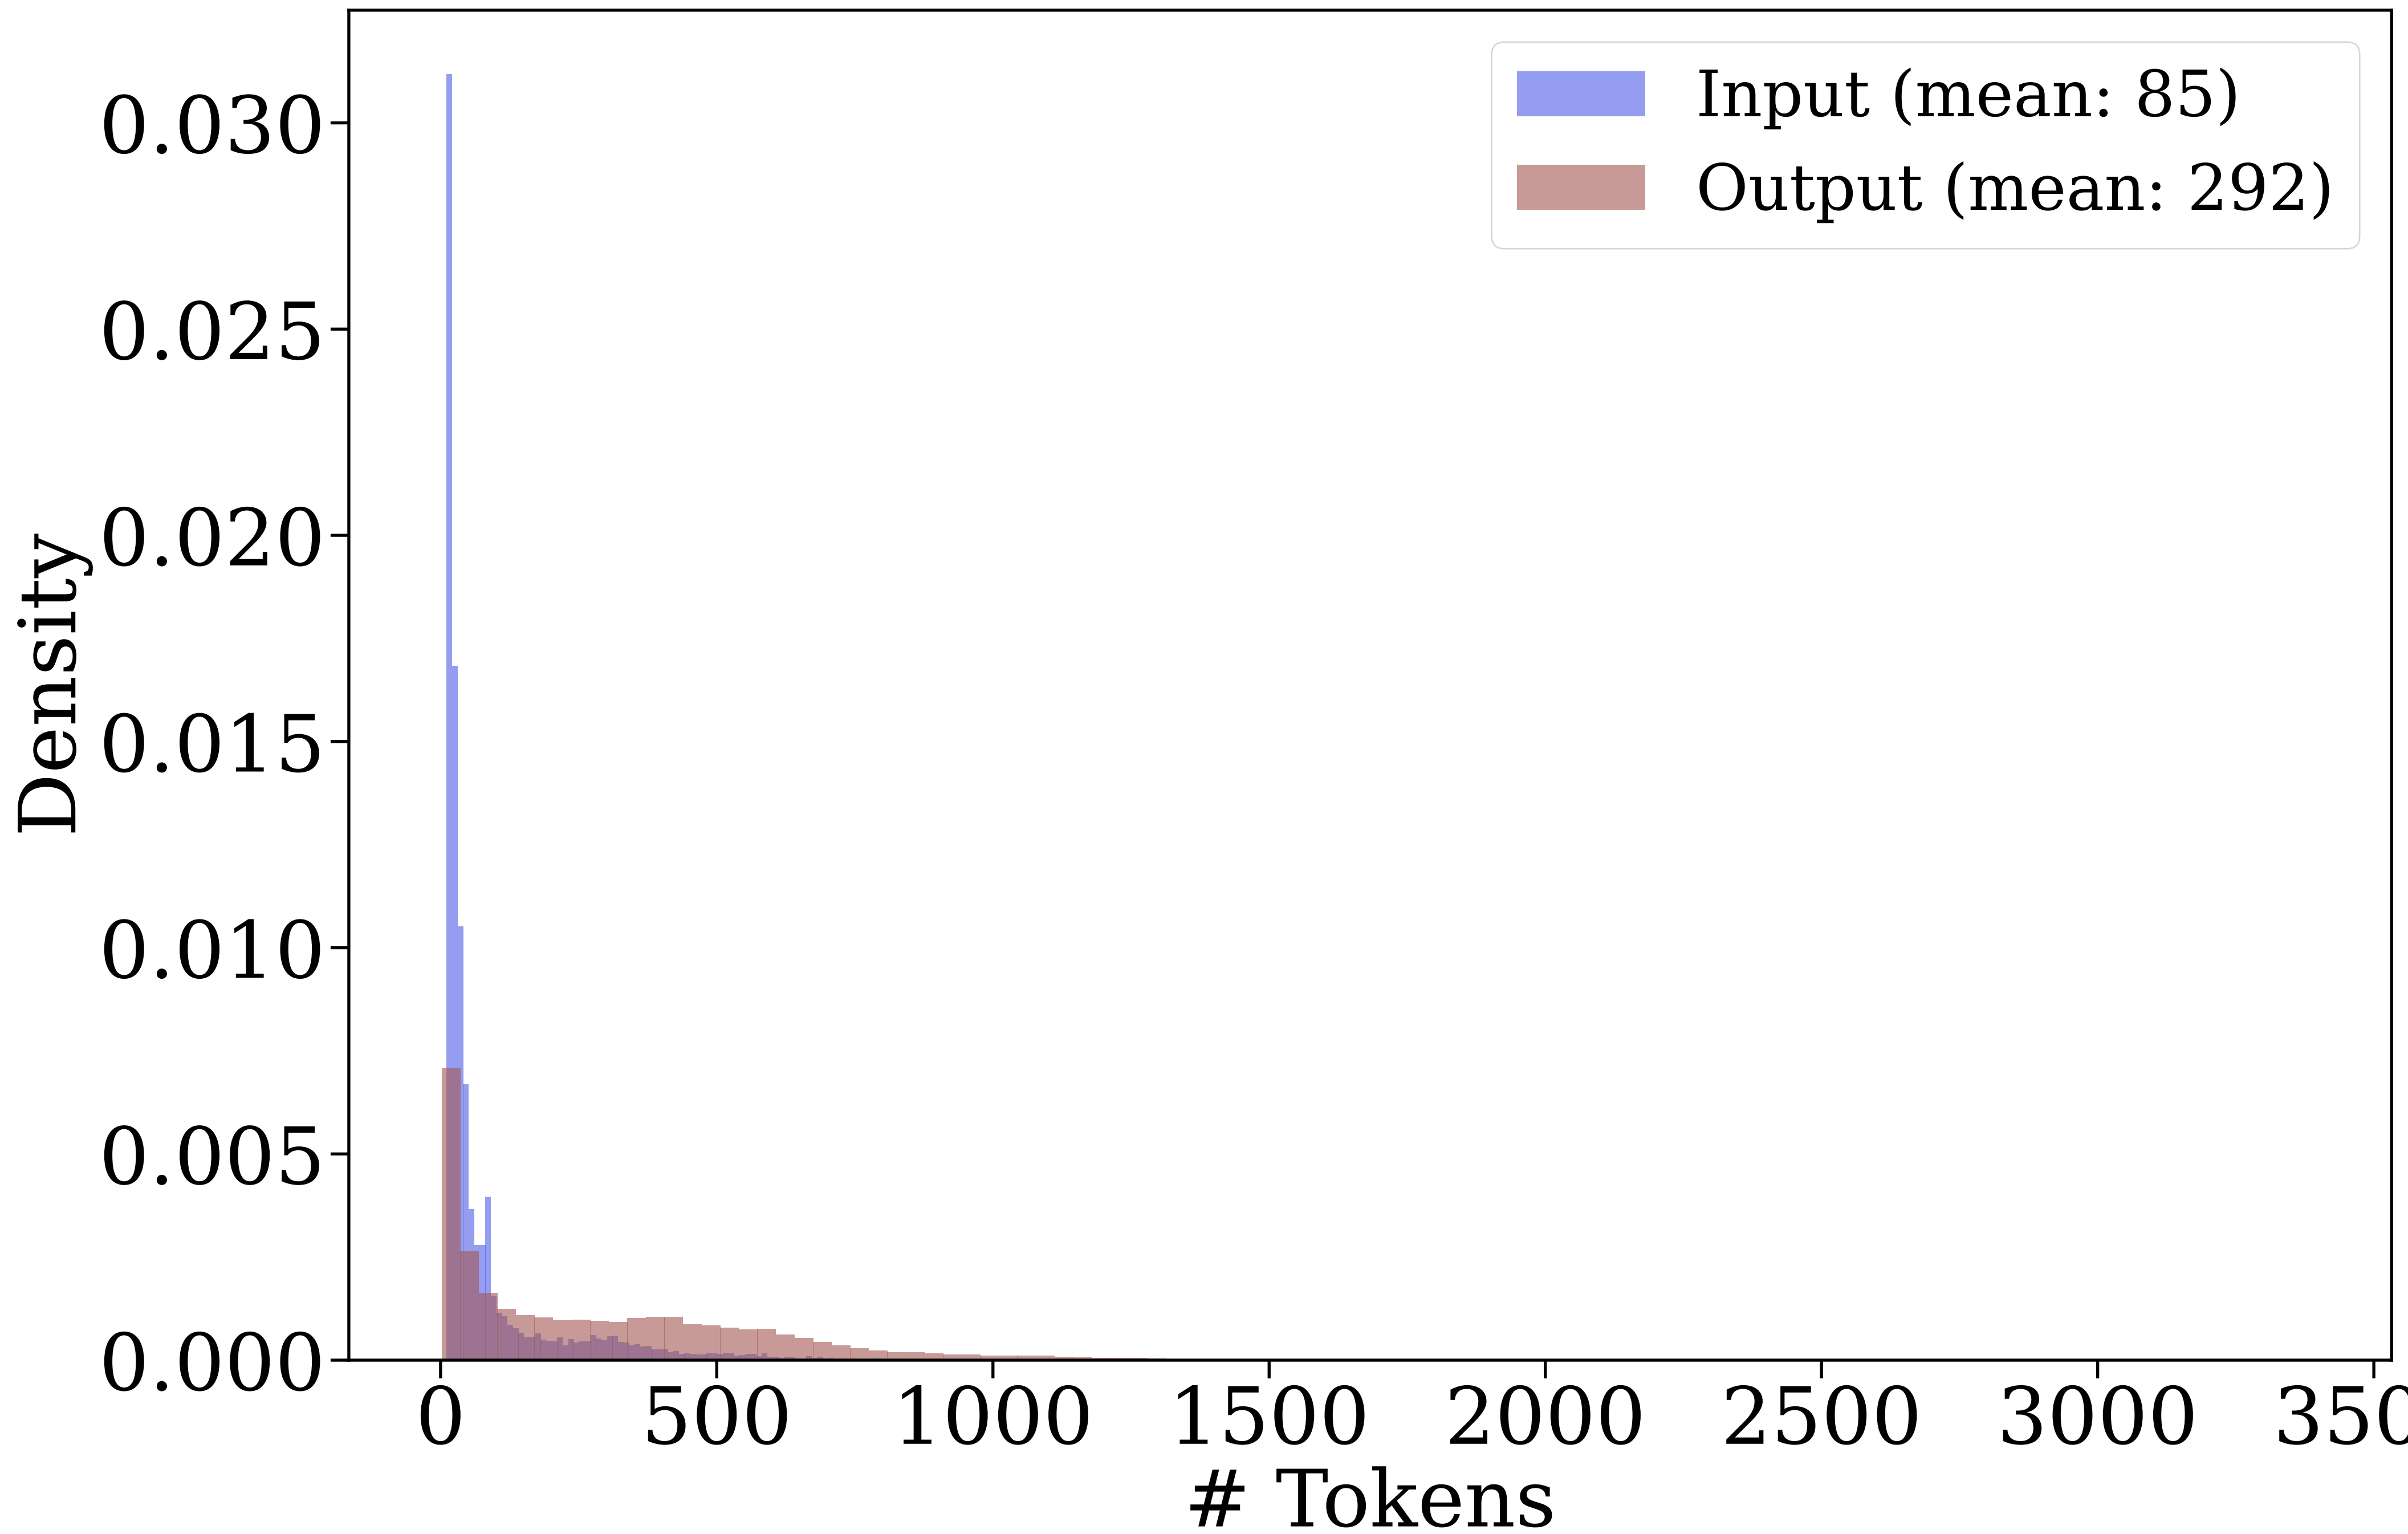

Supplement: supplementary_material [file llama8b-lmsys-distribution.pdf › scorpio/draw/others/dataset_distribution/llama8b-lmsys-distribution.pdf]

# LLaMA-8B ShareGPT

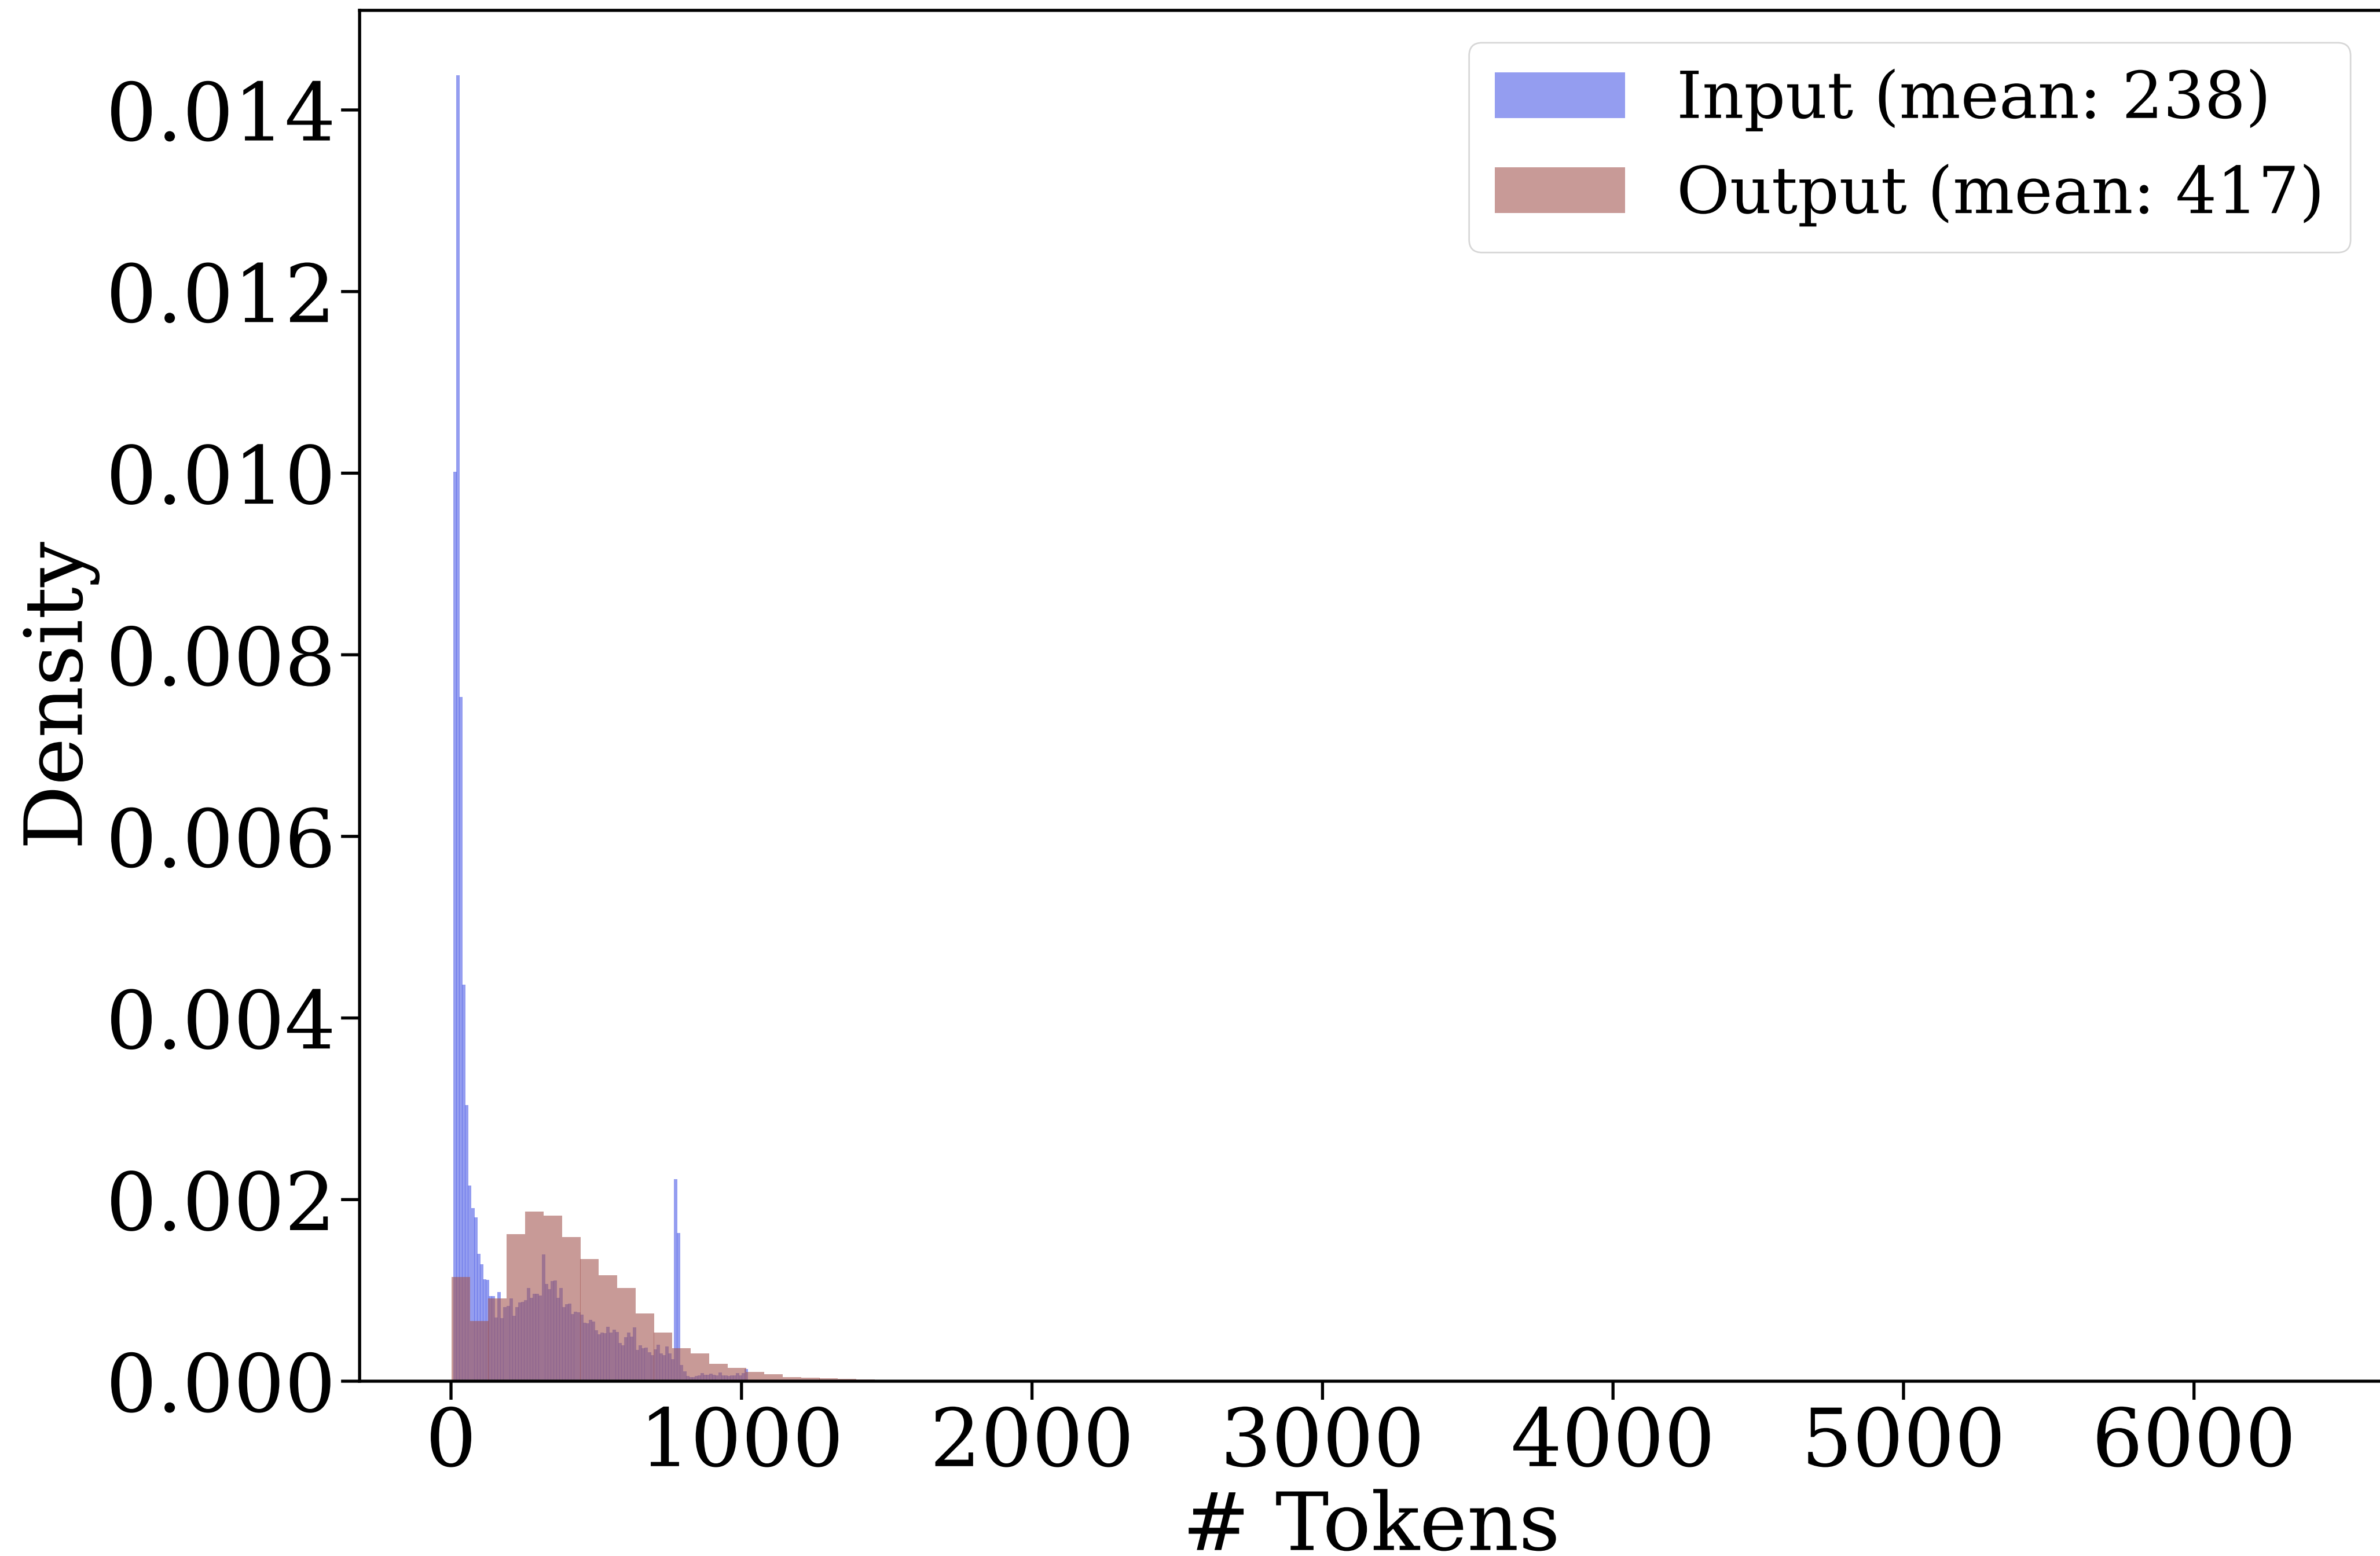

Supplement: supplementary_material [file llama8b-sharegpt-distribution.pdf › scorpio/draw/others/dataset_distribution/llama8b-sharegpt-distribution.pdf]

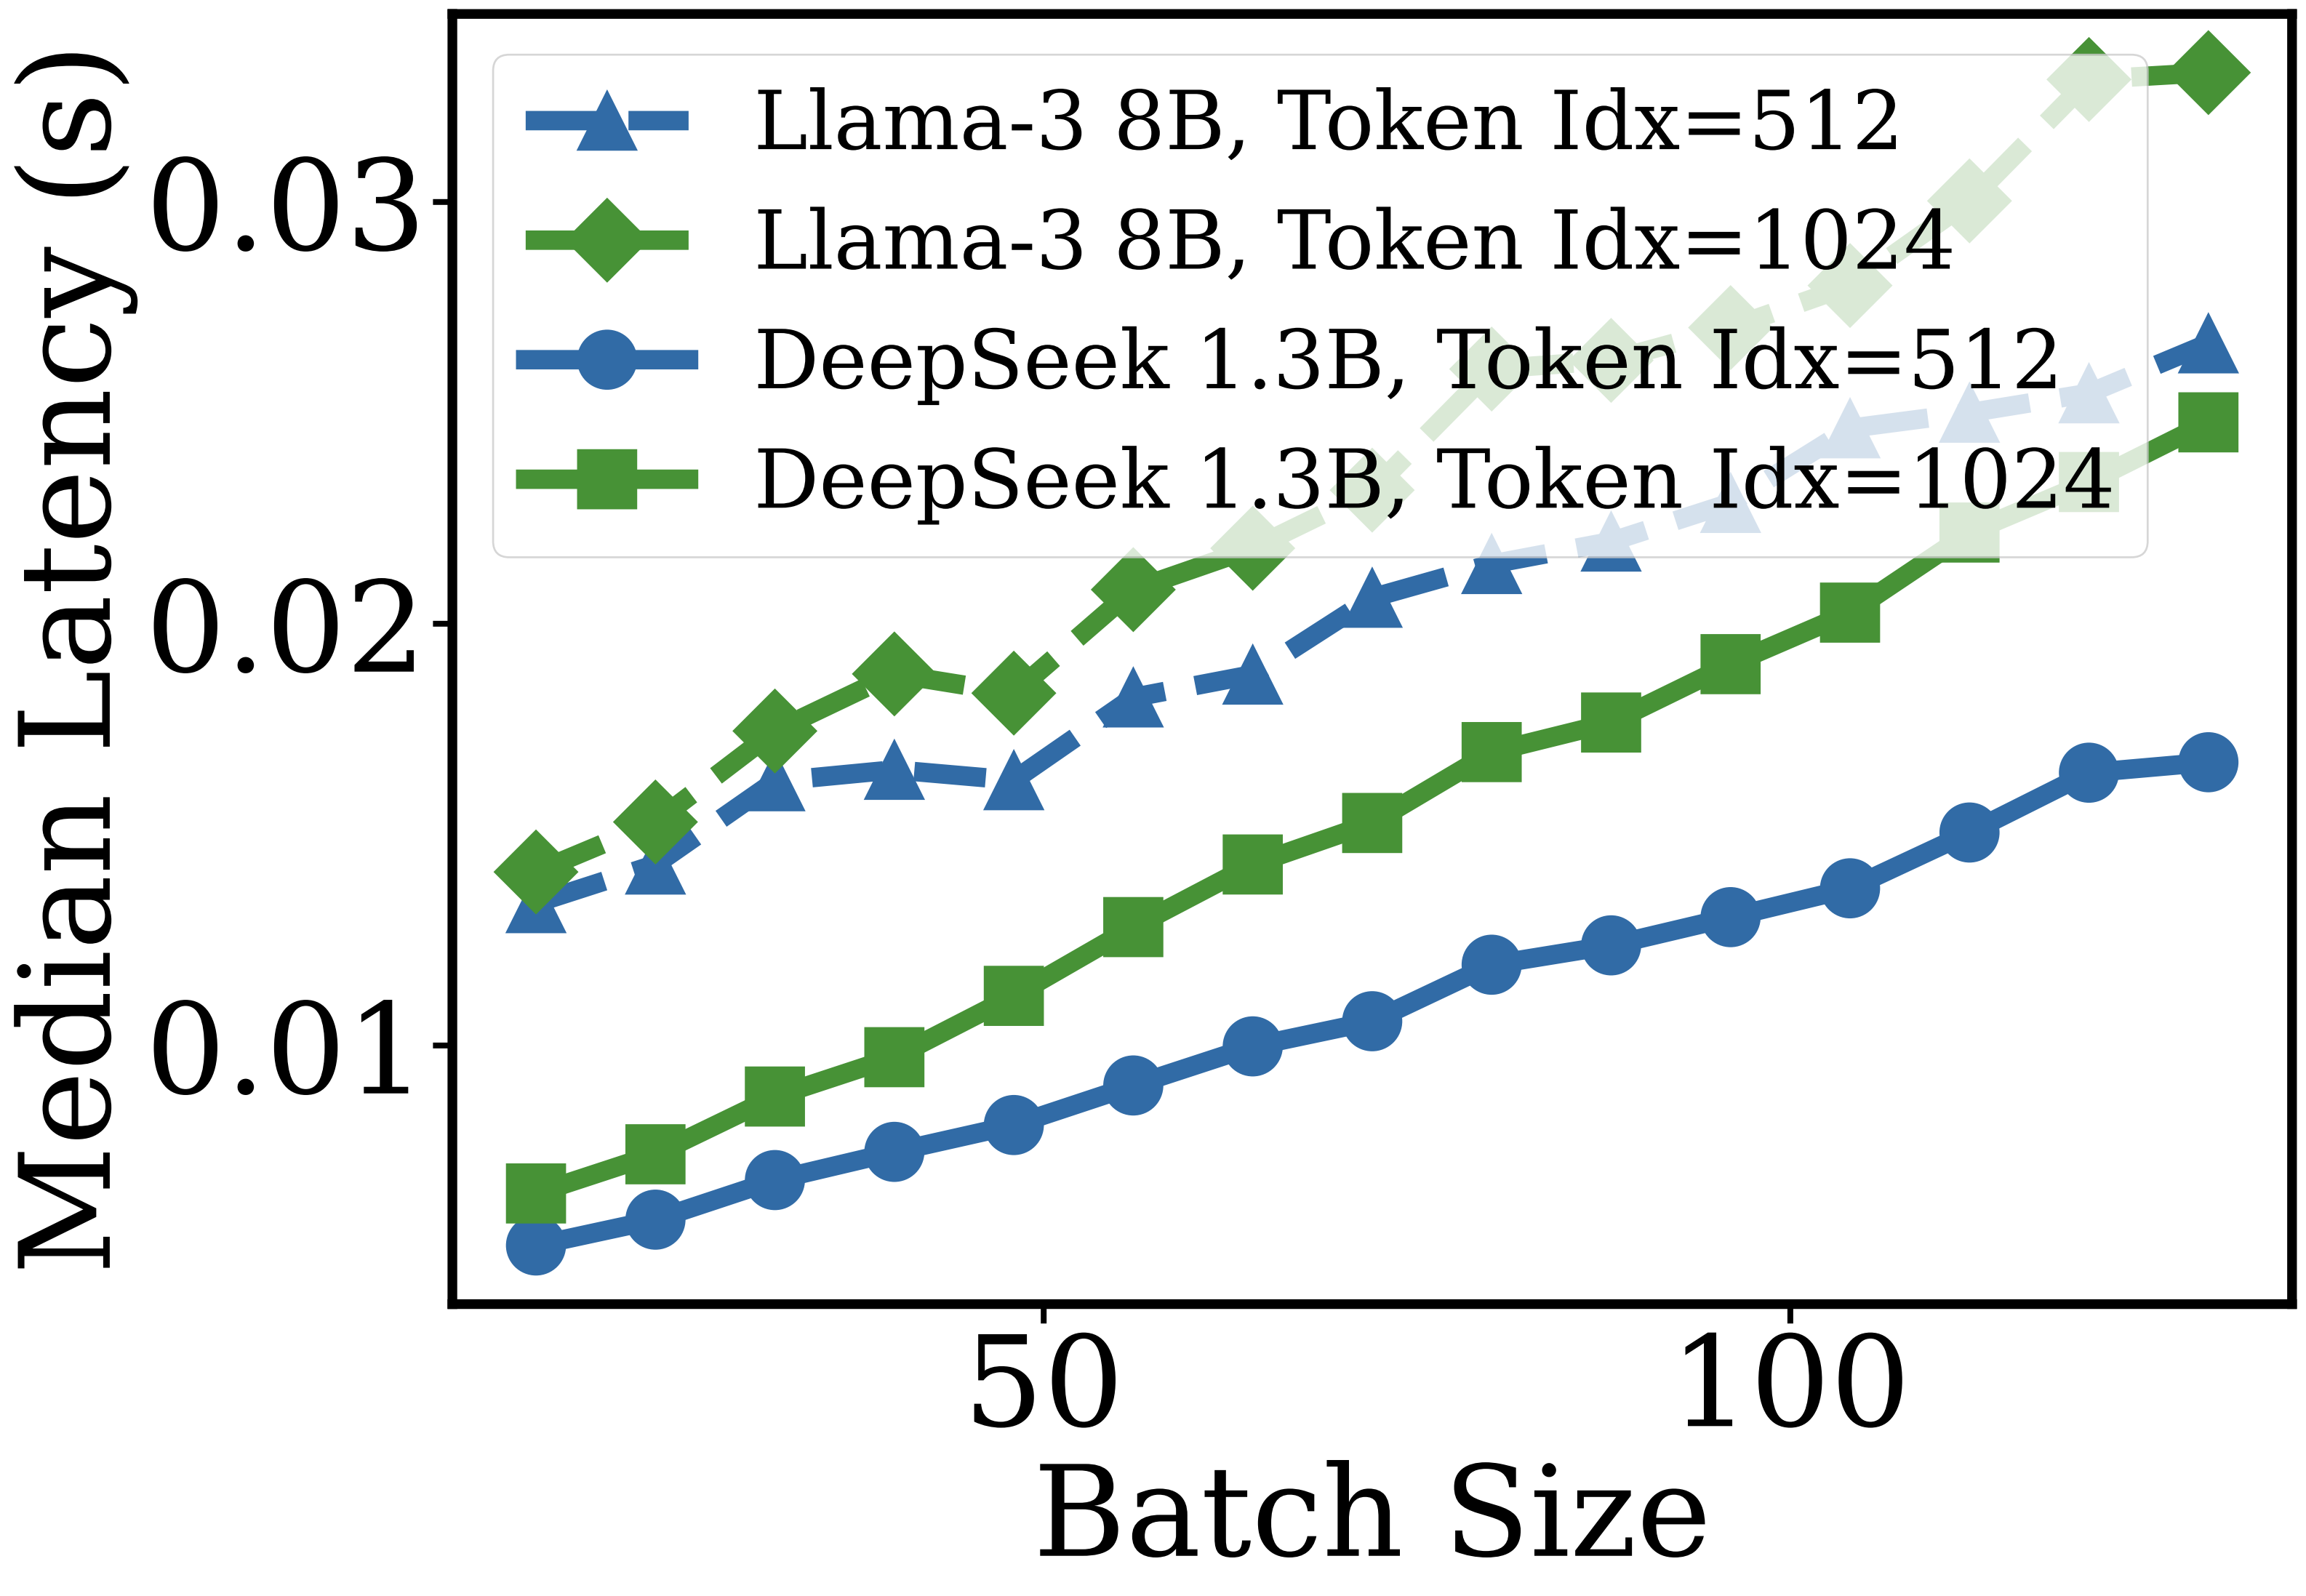

Supplement: supplementary_material [file decode_latency_vs_batch_size.pdf › scorpio/draw/others/prefill_decode_modeling/decode_latency_vs_batch_size.pdf]

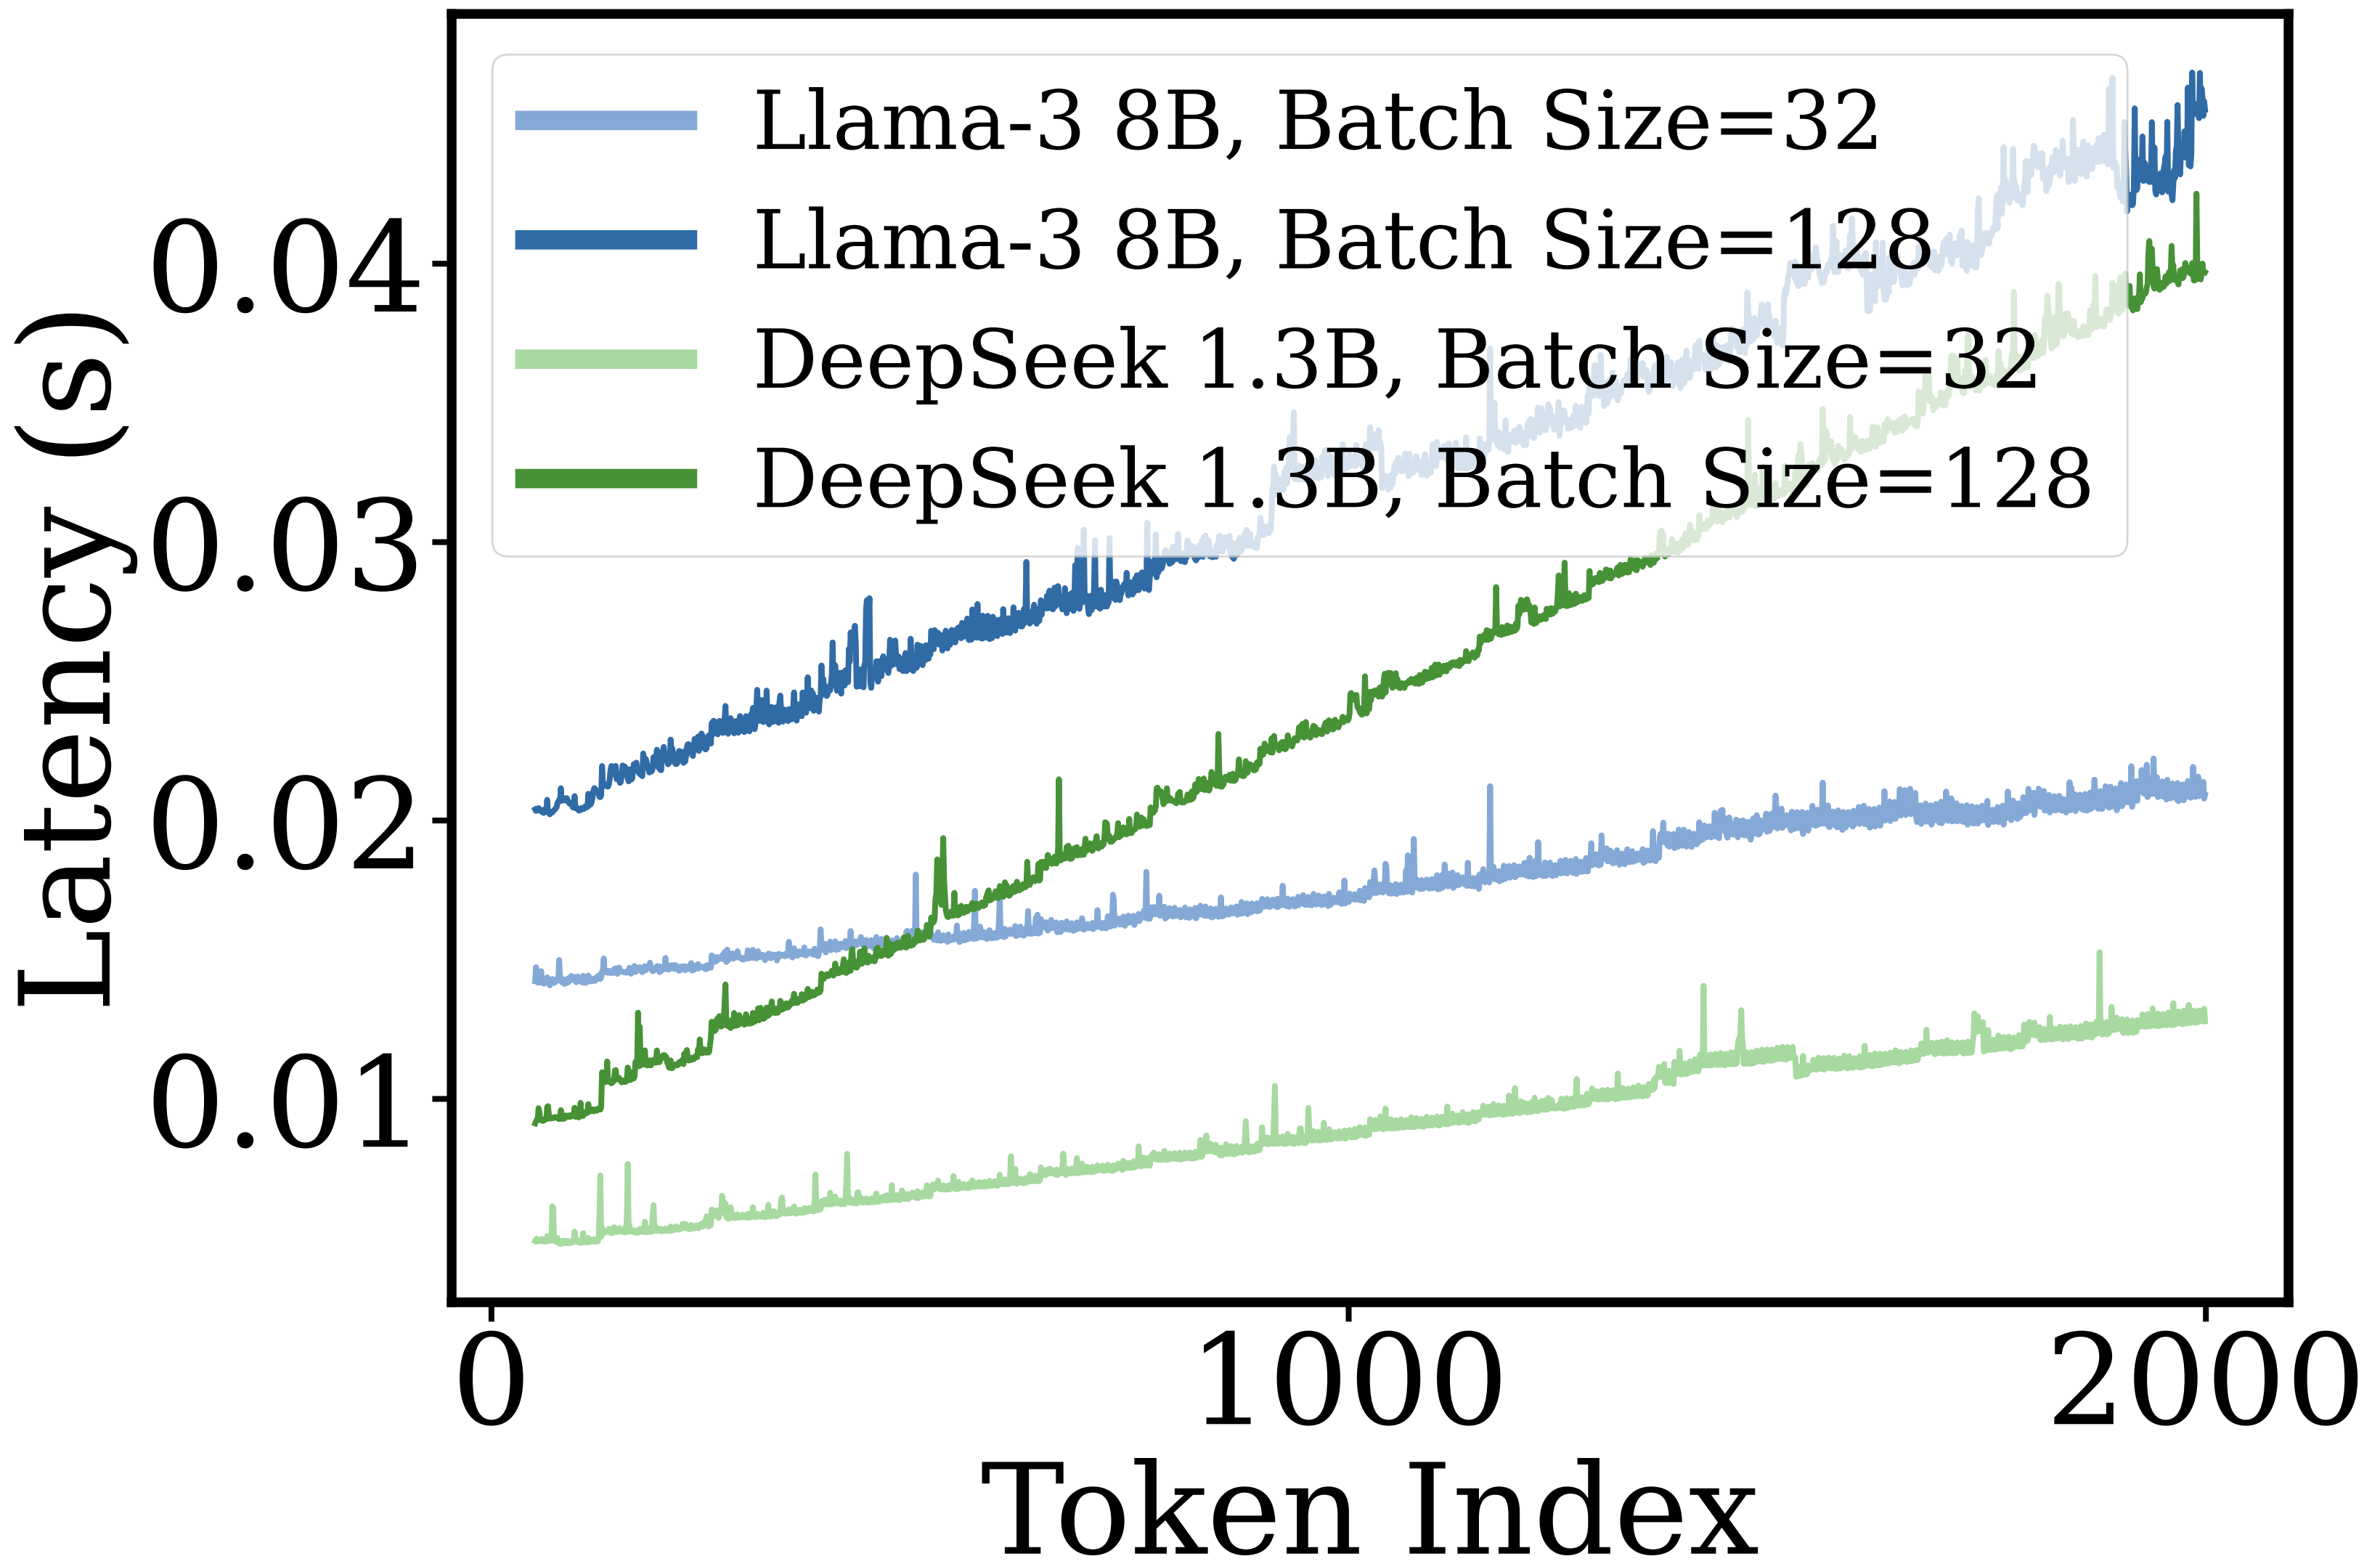

Supplement: supplementary_material [file decode_latency_vs_token_idx.pdf › scorpio/draw/others/prefill_decode_modeling/decode_latency_vs_token_idx.pdf]

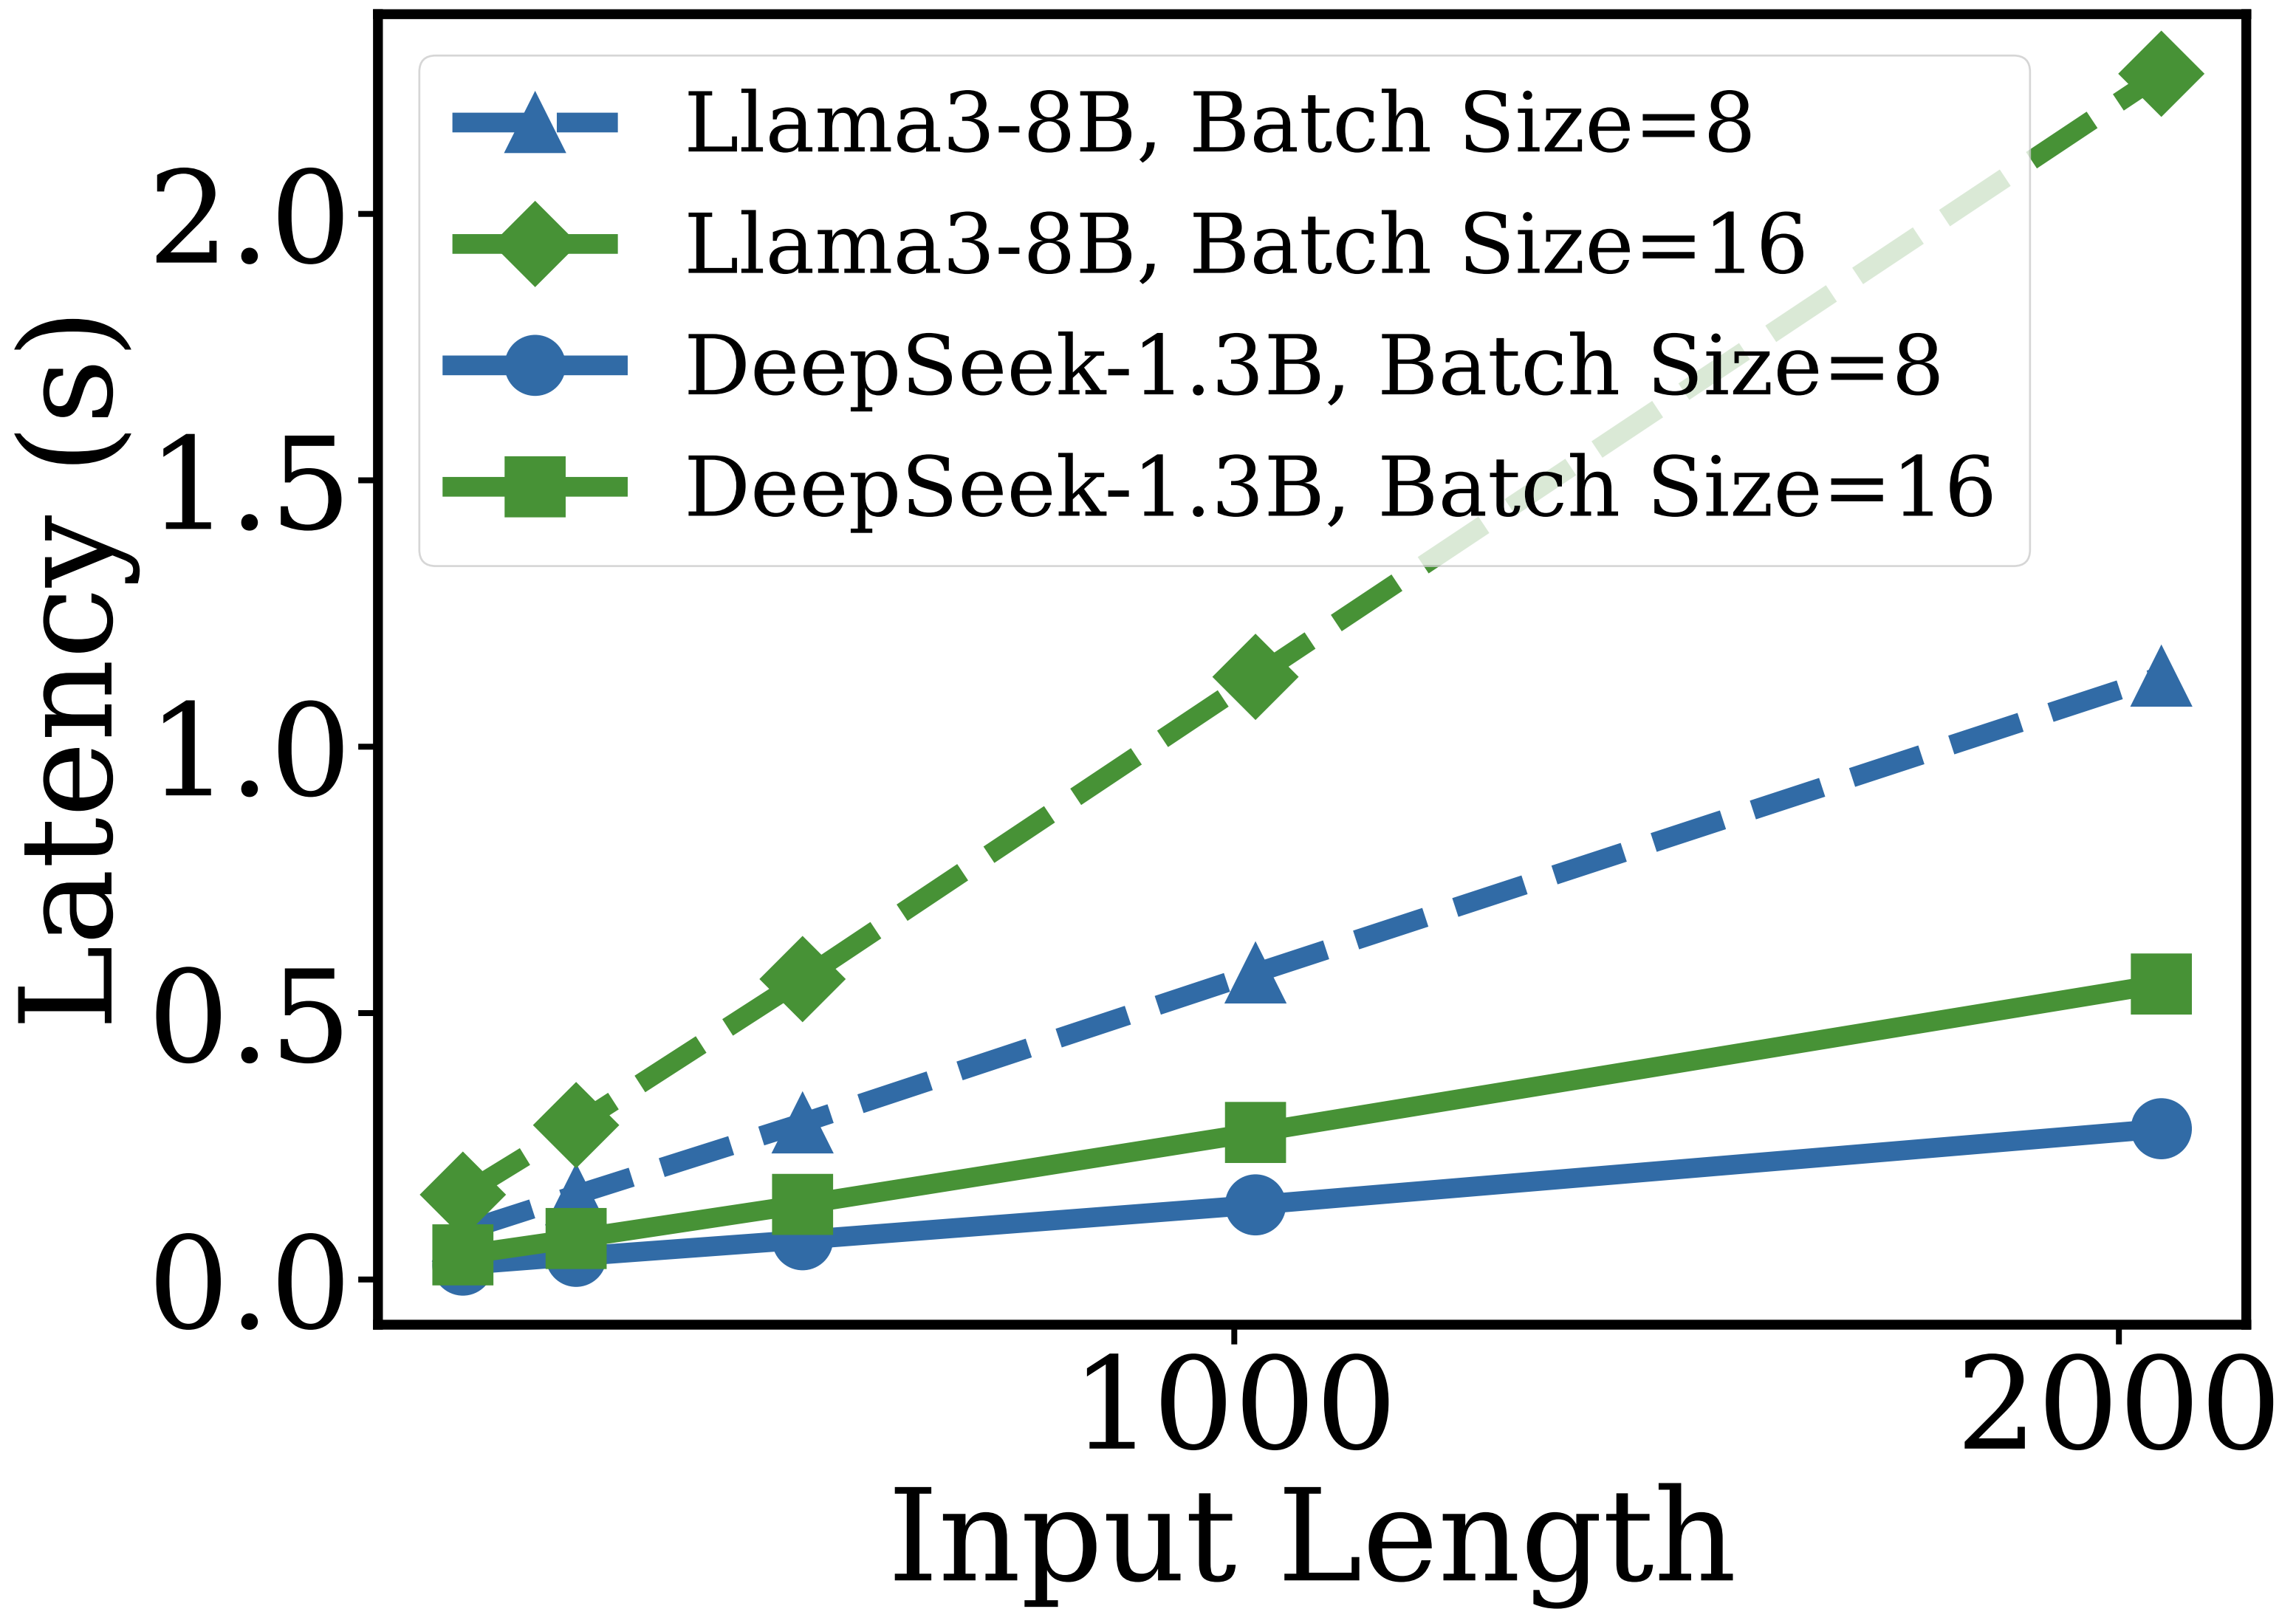

Supplement: supplementary_material [file prefill_latency_vs_input_length.pdf › scorpio/draw/others/prefill_decode_modeling/prefill_latency_vs_input_length.pdf]

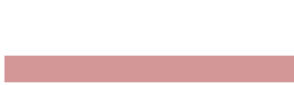

Token Idx=512

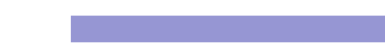

Token Idx=512

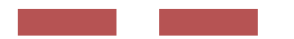

Token Idx=1024

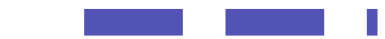

Token Idx=1024

Supplement: supplementary_material [file shared_legend_latency_groups.pdf › scorpio/draw/prefill_decode_modeling/picture/shared_legend_latency_groups.pdf]

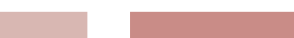

Llama-3.1 8B

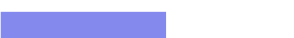

DeepSeek 1.3B

Supplement: supplementary_material [file shared_legend_llama_deepseek.pdf › scorpio/draw/prefill_decode_modeling/picture/shared_legend_llama_deepseek.pdf]

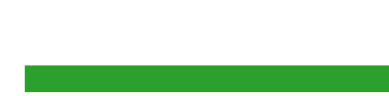

λScale-Net

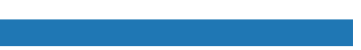

ServerlessLLM-SSD

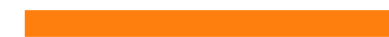

FaaSNet

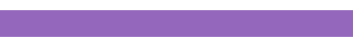

NCCL

Supplement: supplementary_material [file shared_legend_scaling_latency.pdf › scorpio/draw/prefill_decode_modeling/picture/shared_legend_scaling_latency.pdf]
